# Supplementary material for: MicroRNA expression and gene regulation drive breast cancer progression and metastasis in PyMT mice
Source: Breast Cancer Res. 2016 Jul 22;18:75. doi: 10.1186/s13058-016-0735-z (PMC4957901; doi:10.1186/s13058-016-0735-z)
Supplement: Additional file 2: — Supplementary tables. (XLSX 1081 kb) [file 13058_2016_735_MOESM2_ESM.xlsx]

## Sheet: ST1
Supplementary Table 1. Differentailly expressed miRNAs.
miRNA	logFC Week.6*	logFC Week.8*	logFC Week.10*	logFC Week.12*	* logFC equal to 0 if corresponding FDR >= 0/05
mmu-mir-196a	-7.03955	-1.82023	-2.28464	-2.58205
mmu-mir-92b	3.41973	3.21946	3.2643	3.44848
mmu-mir-146b	2.95766	3.22096	3.09304	3.24029
mmu-mir-1a	-2.82784	0	-1.75149	-7.1867
mmu-mir-31	2.67359	3.67915	3.21829	3.70237
mmu-mir-1983	2.59857	2.30616	3.07308	2.57446
mmu-mir-298	2.19625	1.6744	2.21095	2.61912
mmu-mir-200b	2.17512	2.25726	2.52394	3.00991
mmu-mir-3105	2.37259	2.27965	2.3134	4.09205
mmu-mir-196b	-2.16187	-1.95189	-2.37391	-2.30705
mmu-mir-133a	-2.11448	-2.38776	-1.44111	-5.89125
mmu-mir-133b	-2.133	0	-1.98323	-5.98542
mmu-mir-2137	2.33913	1.62655	0	0
mmu-mir-375	2.1471	1.94278	2.00113	2.96096
mmu-mir-6539	2.36964	2.73966	3.6832	3.36222
mmu-mir-429	1.98708	2.11193	2.13898	2.5957
mmu-mir-154	-2.05212	-1.55603	0	0
mmu-mir-183	1.89736	2.02356	2.07229	2.54649
mmu-mir-466b	2.11957	2.75941	3.54714	3.16463
mmu-mir-493	-3.57602	0	0	0
mmu-mir-377	-2.2402	0	0	0
mmu-mir-148a	1.79602	1.92048	1.65963	1.76368
mmu-mir-296	1.82708	1.48781	1.85459	2.15118
mmu-mir-200c	1.79353	2.16353	2.16895	2.36923
mmu-mir-539	-2.73631	0	0	0
mmu-mir-23b	1.72877	2.08242	2.11692	2.16856
mmu-mir-421	1.75087	1.78714	1.89871	1.94052
mmu-mir-672	1.91591	2.01386	2.72255	3.02406
mmu-mir-466c	2.19043	2.46776	2.79488	3.34214
mmu-mir-182	1.66417	1.90506	1.99253	2.34583
mmu-mir-380	-2.30494	0	0	0
mmu-mir-370	-2.03743	0	0	0
mmu-mir-200a	1.61882	1.98079	1.94153	2.42536
mmu-mir-653	-2.72503	0	0	-5.22206
mmu-mir-674	1.61109	1.57885	1.91454	1.85661
mmu-mir-376b	-1.84437	0	0	0
mmu-mir-410	-1.67639	0	0	0
mmu-mir-665	-2.06127	0	0	0
mmu-mir-322	-1.55349	-1.53611	0	0
mmu-mir-708	-1.56653	-2.787	-3.16732	-3.17299
mmu-mir-19a	1.53124	0	1.79771	1.91452
mmu-mir-8106	2.19039	0	0	0
mmu-mir-675	-3.56819	0	0	0
mmu-mir-369	-1.68722	0	0	0
mmu-mir-341	-1.6117	0	0	0
mmu-mir-466p	2.40179	2.73152	2.38729	3.86518
mmu-mir-337	-1.53804	0	0	0
mmu-mir-136	-1.50902	0	0	0
mmu-mir-434	-1.47191	0	0	0
mmu-mir-18a	1.47182	1.5159	2.02197	2.59777
mmu-mir-382	-1.96589	0	0	0
mmu-mir-130a	-1.45024	-1.82329	-1.86215	-1.5745
mmu-mir-18b	3.09901	0	2.96063	0
mmu-mir-300	-1.5713	0	0	0
mmu-mir-134	-1.47982	0	0	0
mmu-mir-666	-1.66194	0	0	0
mmu-mir-411	-1.43478	0	0	0
mmu-mir-34b	-1.48135	0	0	0
mmu-mir-381	-1.48392	0	0	0
mmu-mir-504	-1.63319	-2.48052	-2.40843	-2.73238
mmu-mir-363	1.58129	0	0	0
mmu-mir-329	-1.42703	0	0	0
mmu-mir-201	2.74818	0	0	0
mmu-mir-106a	2.22368	0	0	0
mmu-mir-673	-1.44319	0	0	0
mmu-mir-376a	-1.43716	0	0	0
mmu-mir-6909	3.21626	0	0	4.14311
mmu-mir-299a	-1.40133	0	0	0
mmu-mir-141	1.35356	1.55004	1.65202	1.88134
mmu-mir-484	1.33813	0	0	0
mmu-mir-466n	2.60354	3.02354	2.60047	0
mmu-mir-1955	2.55047	0	0	2.4815
mmu-mir-27b	1.32996	2.02059	2.13042	2.046
mmu-mir-96	1.35783	1.57656	1.79085	2.32843
mmu-mir-335	-1.32935	-1.95849	-1.97625	0
mmu-mir-211	-2.65833	-5.16628	0	0
mmu-mir-379	-1.33035	0	0	0
mmu-mir-135b	-4.9717	0	0	0
mmu-mir-145a	-1.28749	-1.88465	-1.92816	-1.4686
mmu-mir-195a	-1.26223	0	0	0
mmu-mir-702	1.57858	0	0	0
mmu-mir-127	-1.25034	0	0	0
mmu-mir-409	-1.27089	0	0	0
mmu-mir-129	-1.69128	-2.83749	-2.4423	-2.02725
mmu-mir-9	0	4.81173	2.51005	5.66672
mmu-mir-150	0	-2.31165	-2.66391	-2.34142
mmu-mir-10b	0	-2.04219	-1.95901	-2.348
mmu-mir-338	0	-2.00211	0	-2.4642
mmu-mir-5128	0	4.50025	0	5.291
mmu-mir-378b	0	-1.96286	-1.76598	-2.06862
mmu-mir-466a	0	2.76115	3.68914	2.65225
mmu-mir-378d	0	-1.82079	-1.59467	-1.73785
mmu-mir-451a	0	-1.78365	0	0
mmu-mir-215	0	-1.89514	-1.93696	-1.93883
mmu-mir-139	0	-1.60936	-1.66408	-1.52483
mmu-mir-466e	0	2.46095	3.05867	4.11412
mmu-mir-193a	0	-1.59655	0	0
mmu-mir-615	0	-1.6195	-1.93752	-1.80792
mmu-mir-144	0	-1.54184	0	0
mmu-mir-592	0	-3.52	-2.83417	-5.15476
mmu-mir-7a	0	1.6036	0	0
mmu-mir-184	0	-1.53358	0	0
mmu-mir-126a	0	-1.51093	-1.39456	0
mmu-let-7k	0	-1.89391	-2.36435	0
mmu-mir-29c	0	-1.45216	-1.35738	-1.4521
mmu-mir-3107	0	-1.43618	0	-1.46518
mmu-mir-486	0	-1.43581	0	-1.48421
mmu-mir-130b	0	1.46387	0	0
mmu-mir-7224	0	0	-3.39299	-1.93948
mmu-mir-20b	0	0	2.44532	0
mmu-mir-7043	0	0	2.15119	2.12732
mmu-mir-467a	0	0	1.85997	1.94489
mmu-mir-669d	0	0	2.33216	2.31341
mmu-mir-135a	0	0	2.24177	0
mmu-mir-1247	0	0	2.00228	0
mmu-mir-297c	0	0	2.42145	2.51729
mmu-mir-7648	0	0	5.61695	0
mmu-mir-877	0	0	1.65032	1.67523
mmu-mir-7081	0	0	2.71895	0
mmu-mir-669l	0	0	2.48482	2.66312
mmu-mir-466f	0	0	3.89723	0
mmu-mir-297a	0	0	1.83887	2.51857
mmu-mir-143	0	0	-1.47287	0
mmu-mir-1968	0	0	2.55489	0
mmu-mir-466d	0	0	1.67762	1.82931
mmu-mir-3066	0	0	2.08902	0
mmu-mir-7650	0	0	2.9886	0
mmu-mir-8103	0	0	3.23087	0
mmu-mir-5122	0	0	1.56352	0
mmu-mir-378c	0	0	-1.3545	-1.8713
mmu-mir-20a	0	0	1.35143	1.81477
mmu-mir-29b	0	0	-1.34404	-1.53921
mmu-mir-499	0	0	0	-3.33235
mmu-mir-206	0	0	0	-5.97664
mmu-mir-208b	0	0	0	-5.85462
mmu-mir-203	0	0	0	-1.91303
mmu-mir-187	0	0	0	1.82657
mmu-mir-181c	0	0	0	1.74127
mmu-mir-669a	0	0	0	1.8933
mmu-mir-149	0	0	0	-1.73568
mmu-mir-677	0	0	0	3.7522
mmu-mir-138	0	0	0	-1.78014
mmu-mir-17	0	0	0	1.67355
mmu-mir-467d	0	0	0	1.9155
mmu-mir-598	0	0	0	-3.65119
mmu-mir-467c	0	0	0	1.90398
mmu-mir-1963	0	0	0	-5.08436
mmu-mir-466h	0	0	0	2.30638
mmu-mir-378a	0	0	0	-1.48943
mmu-mir-669m	0	0	0	2.74479
mmu-mir-147	0	0	0	-2.04155
mmu-mir-7226	0	0	0	3.80487
mmu-mir-7228	0	0	0	2.86052
mmu-mir-181d	0	0	0	1.444

## Sheet: ST2
Supplementary Table 2. mRNA expression.
Gene Name	logFC Week.6*	logFC Week.8*	logFC Week.10*	logFC Week.12*	* logFC is equal to 0 if corresponging FDR >= 0.05
h19	3.18206	0	0	0
cav2	1.25011	1.25011	1.25011	1.25011
tbx2	2.73821	2.73821	0	2.73821
igsf5	-2.8901	-2.8901	-2.8901	-2.8901
ccnd2	2.04678	2.04678	2.04678	2.04678
hddc2	-1.73214	0	0	-1.73214
tpd52l1	-2.17158	0	-2.17158	-2.17158
comt	1.25309	1.25309	1.25309	1.25309
wap	-9.52417	-9.52417	-9.52417	-9.52417
pparg	2.20048	2.20048	2.20048	2.20048
pdgfb	2.63874	2.63874	0	2.63874
abhd15	2.71199	2.71199	2.71199	2.71199
btn1a1	-2.52616	0	0	0
serpinf1	2.13611	2.13611	2.13611	0
mmp14	1.352	0	1.352	1.352
wfdc18	-3.13702	0	-3.13702	-3.13702
s100a6	1.73963	0	0	1.73963
nhp2	-1.4585	0	0	0
col6a1	1.71342	0	1.71342	0
ramp2	3.6325	3.6325	3.6325	3.6325
lsr	-1.26893	-1.26893	-1.26893	-1.26893
acp5	1.3362	1.3362	1.3362	1.3362
cnn1	2.51922	2.51922	0	2.51922
ube2c	-2.11488	0	-2.11488	0
snd1	-0.99489	0	0	-0.99489
col18a1	2.16261	0	2.16261	2.16261
ell2	-1.35631	0	-1.35631	0
csn3	-5.10176	-5.10176	-5.10176	-5.10176
hoxc8	4.99302	0	4.99302	4.99302
marveld3	-1.4194	0	-1.4194	-1.4194
rin2	-0.995093	0	-0.995093	0
folr1	-5.3021	-5.3021	-5.3021	-5.3021
slc1a5	2.5545	2.5545	2.5545	2.5545
vwf	2.51195	2.51195	2.51195	2.51195
esam	1.97895	1.97895	1.97895	1.97895
gria3	2.05415	0	0	0
celf2	1.29796	1.29796	1.29796	1.29796
nr1h3	1.8731	1.8731	1.8731	1.8731
angptl4	1.60972	1.60972	1.60972	1.60972
axl	1.67513	1.67513	1.67513	1.67513
jag2	1.87956	0	1.87956	0
plin4	2.7855	2.7855	2.7855	2.7855
pla1a	2.49818	0	2.49818	2.49818
cd97	1.29487	0	1.29487	1.29487
lamb1	1.70664	1.70664	1.70664	1.70664
cd36	2.32189	2.32189	2.32189	2.32189
bcam	1.52264	1.52264	1.52264	1.52264
klf4	2.4215	2.4215	0	2.4215
lipe	2.40648	2.40648	2.40648	2.40648
tbc1d8	-1.19565	0	-1.19565	0
plag1	4.49016	0	0	4.49016
ap1m2	-1.76667	-1.76667	-1.76667	-1.76667
fkbp11	-2.17703	0	0	0
fcgrt	2.03769	2.03769	2.03769	2.03769
prodh	1.60813	1.60813	1.60813	1.60813
ier3	-2.42458	-2.42458	-2.42458	-2.42458
sec14l2	-2.04957	-2.04957	-2.04957	-2.04957
cp	-1.99503	-1.99503	-1.99503	-1.99503
rps6ka1	-1.87034	-1.87034	-1.87034	-1.87034
calr	-1.23516	0	-1.23516	0
nqo1	-2.1333	-2.1333	-2.1333	-2.1333
mmd	2.43727	2.43727	2.43727	2.43727
hlf	-1.6602	0	0	0
ssbp2	1.81235	0	1.81235	1.81235
ptrf	2.38033	2.38033	2.38033	2.38033
col5a3	2.78682	2.78682	2.78682	2.78682
dnmt1	-1.01562	0	-1.01562	-1.01562
angptl2	2.24782	2.24782	2.24782	2.24782
etv1	-2.92046	0	-2.92046	-2.92046
atn1	1.5241	0	0	0
ptpn6	-1.73656	0	0	0
clcn3	-1.04043	0	-1.04043	-1.04043
bid	-1.5932	0	0	-1.5932
sgce	2.20928	2.20928	2.20928	2.20928
chn2	-1.60675	0	0	-1.60675
aqp1	2.13971	2.13971	2.13971	2.13971
crabp2	-2.6524	-2.6524	-2.6524	-2.6524
thop1	-1.3746	0	0	-1.3746
slc2a9	-2.28741	-2.28741	-2.28741	-2.28741
slc1a3	1.94879	1.94879	1.94879	1.94879
nid1	2.29887	2.29887	2.29887	2.29887
mcm5	-1.60244	-1.60244	0	-1.60244
ddx39	-1.35724	0	0	0
por	1.71736	0	1.71736	1.71736
igf1r	1.71514	1.71514	1.71514	1.71514
sqrdl	2.13064	2.13064	2.13064	2.13064
ctns	-1.27475	0	0	0
clint1	-1.42615	-1.42615	-1.42615	-1.42615
htra1	2.35531	2.35531	2.35531	2.35531
fblim1	-2.25002	-2.25002	-2.25002	-2.25002
atp6v1b1	-2.05349	0	-2.05349	-2.05349
ggt1	-1.69998	-1.69998	-1.69998	0
tek	1.52758	1.52758	1.52758	1.52758
neu1	-1.34594	0	0	0
pcdha2	3.28288	0	0	0
cav1	2.52746	2.52746	2.52746	2.52746
twist2	Inf	0	0	0
cers4	4.6279	4.6279	0	4.6279
nfib	-0.883953	0	-0.883953	-0.883953
bmp7	2.64778	0	0	2.64778
tmem184b	1.7882	1.7882	1.7882	1.7882
derl3	-3.36283	0	-3.36283	0
rarres2	2.45066	2.45066	2.45066	0
nav1	1.87326	1.87326	1.87326	1.87326
g0s2	-1.48132	0	0	0
slc38a3	-2.48814	-2.48814	-2.48814	-2.48814
rassf1	-1.35471	0	0	0
eya4	5.56146	0	0	0
apol7a	-5.20087	0	-5.20087	-5.20087
slc5a1	-2.10662	-2.10662	-2.10662	-2.10662
gltp	2.27173	2.27173	2.27173	0
scarf2	3.02086	3.02086	0	3.02086
aim1l	-3.31765	-3.31765	0	-3.31765
ehf	-1.5286	0	-1.5286	-1.5286
steap4	1.24316	1.24316	1.24316	1.24316
retn	2.96638	2.96638	2.96638	2.96638
etv5	-1.99813	0	0	-1.99813
ptprs	1.54443	0	0	1.54443
zfp651	2.27124	0	0	2.27124
clip3	3.1583	3.1583	0	3.1583
bicc1	1.92072	0	1.92072	1.92072
surf4	-1.13621	0	-1.13621	-1.13621
ppp1cb	-0.975005	0	-0.975005	-0.975005
abca1	1.26599	0	1.26599	1.26599
2310057j18rik	-7.88281	0	-7.88281	-7.88281
lpl	2.52945	2.52945	2.52945	2.52945
eps8	2.00908	2.00908	2.00908	2.00908
adamtsl4	2.18623	0	0	2.18623
lbp	-3.03581	-3.03581	-3.03581	-3.03581
fli1	1.55353	1.55353	1.55353	1.55353
cd34	2.22666	2.22666	0	2.22666
dyrk3	-2.32529	-2.32529	0	-2.32529
cmah	2.02508	2.02508	0	0
plcg1	1.12354	0	0	0
cd300lg	2.90554	2.90554	2.90554	2.90554
aldoc	-1.80708	-1.80708	-1.80708	-1.80708
rarb	6.01617	0	0	6.01617
igfbp4	2.21221	2.21221	2.21221	2.21221
cdc6	-1.99323	0	0	0
rab11fip4	-1.89214	-1.89214	-1.89214	-1.89214
slc35c2	-1.47048	0	-1.47048	-1.47048
rhbdl3	4.17444	4.17444	0	4.17444
ada	-2.39052	0	0	0
serinc3	-1.03588	0	-1.03588	-1.03588
birc5	-2.09865	-2.09865	-2.09865	-2.09865
mmp9	4.31729	0	0	4.31729
pltp	1.94395	1.94395	1.94395	1.94395
slc12a4	1.58809	1.58809	1.58809	1.58809
eya2	-1.82305	-1.82305	-1.82305	-1.82305
mfng	2.05539	2.05539	2.05539	2.05539
uchl5	-1.73365	0	0	0
pmp22	2.1363	2.1363	2.1363	2.1363
shroom1	-2.02988	-2.02988	-2.02988	-2.02988
sparc	1.92611	1.92611	1.92611	0
tbx3	2.39042	2.39042	2.39042	2.39042
ikzf1	-1.81364	-1.81364	-1.81364	-1.81364
bc096441	3.02882	0	0	0
acsl1	1.81153	0	1.81153	1.81153
myh11	2.56424	2.56424	2.56424	2.56424
pank3	1.42991	1.42991	1.42991	1.42991
wwc1	-1.66792	-1.66792	-1.66792	-1.66792
alox12e	8.05026	0	0	0
arrb1	1.29445	1.29445	0	0
rab3d	-1.44288	-1.44288	-1.44288	-1.44288
rnf145	-1.25384	0	-1.25384	-1.25384
dpep1	2.08874	2.08874	2.08874	0
aoc3	2.82154	2.82154	2.82154	2.82154
sec14l4	3.07902	0	0	0
tlcd1	1.68238	0	0	1.68238
rcn3	1.88495	0	1.88495	0
cyb561	-1.58594	-1.58594	-1.58594	-1.58594
syne4	-1.88566	-1.88566	-1.88566	-1.88566
esr1	2.11518	2.11518	2.11518	2.11518
fuca2	-1.83126	-1.83126	0	-1.83126
slc16a10	2.21313	2.21313	2.21313	2.21313
rev3l	1.0223	0	0	1.0223
lama4	1.13004	1.13004	1.13004	1.13004
d10bwg1379e	-3.82439	-3.82439	-3.82439	-3.82439
aim1	-1.32945	-1.32945	-1.32945	-1.32945
lama2	1.82677	1.82677	1.82677	1.82677
dcn	2.36607	2.36607	2.36607	2.36607
cdk1	-1.67093	-1.67093	-1.67093	-1.67093
myb	2.64349	0	0	0
enpp3	-2.16443	-2.16443	-2.16443	-2.16443
map7	-1.56291	0	-1.56291	-1.56291
tmcc3	1.36416	1.36416	0	1.36416
timp3	1.77876	0	1.77876	1.77876
hsp90b1	-1.15781	0	-1.15781	0
igf1	2.21565	2.21565	2.21565	2.21565
dram1	2.26602	2.26602	2.26602	2.26602
slc5a8	-1.9116	0	-1.9116	-1.9116
aifm2	1.85352	1.85352	1.85352	1.85352
4632428n05rik	1.33306	0	0	0
egfr	1.05563	0	0	0
ptprb	2.17802	2.17802	2.17802	2.17802
rab36	5.92981	0	5.92981	5.92981
grb10	1.75387	1.75387	0	0
phlda1	-1.50022	0	-1.50022	-1.50022
col6a2	1.4284	0	1.4284	0
adarb1	1.85923	1.85923	1.85923	1.85923
appl2	-1.19662	0	-1.19662	-1.19662
lyrm7	Inf	0	0	0
shc2	2.87216	0	2.87216	0
sptbn1	1.09819	1.09819	1.09819	1.09819
phf15	2.86284	2.86284	2.86284	2.86284
gatsl3	4.98522	0	0	0
igfbp3	1.27414	0	1.27414	0
tcn2	-1.24093	0	-1.24093	-1.24093
xbp1	-2.4688	-2.4688	-2.4688	-2.4688
galnt10	-1.54457	-1.54457	-1.54457	-1.54457
srebf1	-1.44285	0	-1.44285	-1.44285
atp6v1c2	-1.96068	0	-1.96068	-1.96068
pdia6	-0.984364	-0.984364	0	0
fam49a	1.99985	1.99985	1.99985	1.99985
fam20a	-2.05278	-2.05278	-2.05278	-2.05278
abca8b	2.11189	2.11189	2.11189	2.11189
klhl29	2.51829	2.51829	2.51829	2.51829
rnf144a	2.13992	2.13992	2.13992	2.13992
id2	-2.47683	-2.47683	-2.47683	-2.47683
mboat2	-2.2384	-2.2384	-2.2384	-2.2384
rrm2	-2.56378	-2.56378	-2.56378	-2.56378
adcy3	2.30597	2.30597	2.30597	2.30597
grhl1	-1.24402	0	-1.24402	-1.24402
pxdn	1.26115	0	1.26115	0
ccl11	2.59267	0	2.59267	2.59267
mrc2	1.62161	1.62161	0	0
lig3	-1.26895	-1.26895	-1.26895	-1.26895
pecam1	1.95035	1.95035	1.95035	1.95035
cacng4	Inf	0	0	0
itgb4	-1.02816	0	-1.02816	-1.02816
aspa	1.87026	1.87026	1.87026	1.87026
acox1	1.1989	0	1.1989	1.1989
llgl2	-1.46477	0	-1.46477	-1.46477
cygb	2.46232	2.46232	2.46232	2.46232
cpd	-1.7058	0	-1.7058	-1.7058
cacna1g	2.05123	2.05123	0	2.05123
lrrc59	-1.24847	0	0	0
myh10	1.74041	0	0	1.74041
gstz1	1.72806	0	1.72806	1.72806
rab15	-2.17029	-2.17029	-2.17029	-2.17029
fut8	-1.38684	0	-1.38684	-1.38684
serpina3n	1.9872	0	1.9872	0
smoc1	1.2187	1.2187	1.2187	0
tc2n	-4.11406	0	-4.11406	-4.11406
net1	1.47372	1.47372	1.47372	1.47372
dcaf4	-1.73264	0	-1.73264	-1.73264
tgfb3	-1.39646	-1.39646	-1.39646	-1.39646
vash1	2.25767	0	0	0
hsp90aa1	-1.58066	-1.58066	-1.58066	-1.58066
tnfaip2	2.41527	0	2.41527	0
gli3	2.75959	2.75959	2.75959	2.75959
ogn	2.13883	2.13883	2.13883	2.13883
2010111i01rik	-1.47013	0	-1.47013	-1.47013
slc28a3	-3.5998	-3.5998	-3.5998	-3.5998
ocln	-1.76636	-1.76636	-1.76636	-1.76636
iqgap2	-1.17253	0	0	-1.17253
jmy	-1.12203	0	0	0
elovl7	-1.86122	-1.86122	0	0
plk2	1.29741	0	1.29741	1.29741
rasgrf2	2.6318	2.6318	2.6318	2.6318
fgf10	2.37436	2.37436	2.37436	2.37436
fam107a	Inf	Inf	0	Inf
acox2	-3.34152	-3.34152	-3.34152	0
il6st	1.10468	1.10468	1.10468	1.10468
bc067074	3.74248	3.74248	3.74248	3.74248
cdhr1	-4.80649	-4.80649	-4.80649	-4.80649
samd4	2.28329	2.28329	0	2.28329
peli2	2.03306	2.03306	2.03306	2.03306
rnase4	2.06116	2.06116	2.06116	2.06116
spata13	-1.1756	0	-1.1756	-1.1756
lcp1	-1.55943	-1.55943	-1.55943	-1.55943
tsc22d1	1.01981	0	1.01981	1.01981
rgcc	2.03223	2.03223	2.03223	2.03223
pbk	-2.69196	-2.69196	-2.69196	-2.69196
trim35	2.32666	2.32666	2.32666	2.32666
dpysl2	1.39139	1.39139	1.39139	1.39139
bmp1	1.83919	0	1.83919	1.83919
gfra2	3.04782	0	3.04782	3.04782
sema5a	1.97508	1.97508	1.97508	1.97508
cmbl	3.69275	3.69275	3.69275	3.69275
shcbp1	-2.14911	-2.14911	-2.14911	-2.14911
sqle	-1.56407	0	0	0
col14a1	1.77094	0	0	0
rangap1	-1.2616	0	0	-1.2616
enpp2	2.39569	2.39569	2.39569	2.39569
parvb	2.49312	0	0	0
c1qtnf6	2.34026	2.34026	0	0
adamts20	2.96695	0	2.96695	2.96695
slc38a4	3.31551	0	0	3.31551
rapgef3	1.46146	0	0	1.46146
hdac7	1.69677	1.69677	1.69677	0
litaf	-1.15067	-1.15067	-1.15067	-1.15067
cldn1	-2.34124	0	-2.34124	-2.34124
il1rap	-2.04549	-2.04549	-2.04549	-2.04549
gpt	1.73875	1.73875	1.73875	1.73875
dgat1	1.14077	0	1.14077	1.14077
gpihbp1	2.90378	2.90378	2.90378	2.90378
shank3	2.65962	2.65962	2.65962	2.65962
kif21a	-1.72878	-1.72878	0	-1.72878
alcam	1.52671	0	1.52671	1.52671
ccdc80	2.51006	2.51006	2.51006	2.51006
sidt1	-2.59673	-2.59673	-2.59673	-2.59673
zbtb20	1.26243	1.26243	1.26243	1.26243
sdf2l1	-2.39257	-2.39257	-2.39257	0
tfrc	-2.22419	-2.22419	-2.22419	-2.22419
arhgap31	1.2793	1.2793	0	0
osbpl11	1.21409	0	1.21409	1.21409
fstl1	1.60775	0	1.60775	1.60775
abcc5	1.82798	1.82798	1.82798	1.82798
mylk	1.97538	1.97538	1.97538	1.97538
adipoq	2.64063	2.64063	2.64063	2.64063
robo1	2.71287	2.71287	0	0
adamts1	1.34968	0	1.34968	1.34968
clic6	-3.25809	-3.25809	-3.25809	-3.25809
lalba	-6.21305	-6.21305	-6.21305	-6.21305
faim2	-4.89489	-4.89489	-4.89489	-4.89489
scn8a	-3.34574	0	0	-3.34574
krt18	-1.20532	0	-1.20532	0
abcc1	1.83899	1.83899	1.83899	1.83899
leprel2	2.05824	0	0	0
serinc2	-1.34609	-1.34609	-1.34609	0
parp3	2.04866	2.04866	2.04866	2.04866
nfatc4	3.12848	3.12848	3.12848	3.12848
slc22a3	2.43535	2.43535	2.43535	2.43535
igf2r	-1.20363	0	-1.20363	-1.20363
pde10a	3.07973	0	0	0
thbs2	1.49728	0	1.49728	1.49728
tnfrsf12a	-1.95651	-1.95651	0	-1.95651
slc29a1	-1.46183	0	-1.46183	-1.46183
trem2	-3.81259	0	0	0
epb4.1l3	2.34193	0	0	0
emilin2	2.09944	2.09944	0	2.09944
xdh	-1.44734	0	0	0
crim1	2.16293	2.16293	2.16293	2.16293
abca3	-1.05828	0	0	0
epas1	1.84724	1.84724	1.84724	1.84724
mcfd2	-1.32647	0	-1.32647	0
c3	1.83351	0	0	0
hn1l	-1.36306	-1.36306	-1.36306	-1.36306
tmem204	2.27112	0	2.27112	2.27112
pkdcc	2.77078	0	0	0
cdh2	2.61287	0	2.61287	0
dsc2	-1.81618	0	-1.81618	-1.81618
epb4.1l4a	-1.26594	0	-1.26594	-1.26594
lama3	1.80736	1.80736	1.80736	1.80736
arap3	1.79438	1.79438	1.79438	1.79438
gabbr1	2.17229	2.17229	0	2.17229
mal2	-1.7131	0	-1.7131	-1.7131
ppp2r2b	Inf	0	0	0
dpysl3	1.89073	0	1.89073	1.89073
sec11c	-1.97497	-1.97497	-1.97497	-1.97497
nars	-1.12332	0	0	0
pdgfrb	1.50752	1.50752	1.50752	1.50752
psat1	-1.69246	-1.69246	-1.69246	-1.69246
fads3	1.9352	1.9352	1.9352	1.9352
fen1	-1.99908	-1.99908	-1.99908	-1.99908
syt7	2.5204	0	0	0
aldh1a7	2.51967	2.51967	2.51967	2.51967
cdc42bpg	-1.27892	0	0	-1.27892
ankrd22	-6.51688	-6.51688	-6.51688	-6.51688
lipa	-2.05696	-2.05696	-2.05696	-2.05696
gldc	-5.59403	0	-5.59403	0
chka	-1.76345	-1.76345	-1.76345	-1.76345
acy3	4.97818	0	0	4.97818
pcx	2.15017	0	0	2.15017
lao1	-7.15838	-7.15838	-7.15838	-7.15838
lgals12	1.65739	1.65739	1.65739	1.65739
rbp4	3.10518	3.10518	3.10518	3.10518
plce1	1.90099	1.90099	1.90099	1.90099
sorbs1	2.50021	2.50021	2.50021	2.50021
gyk	-1.87108	0	0	0
col17a1	1.62651	0	0	0
ablim1	1.96666	1.96666	1.96666	1.96666
hspa12a	3.08869	3.08869	3.08869	3.08869
ppp1r27	Inf	0	0	0
p4hb	-1.10897	-1.10897	-1.10897	-1.10897
hexa	2.02693	2.02693	0	2.02693
zfhx4	2.35951	2.35951	2.35951	2.35951
pfkfb1	2.66197	0	2.66197	2.66197
flnb	-1.34142	-1.34142	-1.34142	-1.34142
sat1	-1.19679	-1.19679	-1.19679	-1.19679
ptprj	-1.17634	0	0	-1.17634
itga7	2.13559	2.13559	2.13559	2.13559
mmp19	2.13232	2.13232	2.13232	2.13232
esyt1	1.14192	0	1.14192	1.14192
aatk	2.0114	2.0114	0	2.0114
cyp2e1	2.52657	2.52657	2.52657	2.52657
hras	-1.91835	-1.91835	-1.91835	-1.91835
eps8l2	-1.71353	-1.71353	-1.71353	-1.71353
pde8a	1.59642	0	1.59642	1.59642
cpeb1	2.10639	2.10639	2.10639	2.10639
rps6ka6	-3.04034	-3.04034	-3.04034	-3.04034
crispld1	2.35943	0	2.35943	2.35943
itih5	2.0348	2.0348	2.0348	2.0348
rassf3	-1.41316	0	-1.41316	-1.41316
nrp1	1.51924	1.51924	1.51924	1.51924
pdia4	-1.10183	0	-1.10183	0
unc5a	5.53714	0	0	5.53714
sox17	2.45819	2.45819	2.45819	2.45819
gsta3	2.74888	2.74888	0	2.74888
tram1	-1.43315	-1.43315	-1.43315	-1.43315
adam23	2.737	2.737	2.737	2.737
nrp2	1.3008	1.3008	1.3008	1.3008
hspd1	-1.10047	0	0	0
col5a2	1.73334	0	1.73334	0
col3a1	1.99695	0	1.99695	0
ptpn18	-1.99324	0	-1.99324	-1.99324
col9a1	-4.34872	-4.34872	-4.34872	-4.34872
igfbp5	-1.88996	-1.88996	-1.88996	-1.88996
fn1	2.12645	0	2.12645	0
obsl1	2.38253	0	2.38253	0
tnfrsf11a	-2.38481	-2.38481	-2.38481	-2.38481
nr5a2	Inf	0	0	Inf
pigr	-5.39854	0	-5.39854	-5.39854
atp2b4	1.84263	1.84263	1.84263	1.84263
glul	2.28567	0	2.28567	2.28567
lamc1	1.7365	1.7365	1.7365	1.7365
rgl1	1.88465	1.88465	1.88465	1.88465
fam129a	1.57566	0	1.57566	1.57566
pycr2	-1.71588	-1.71588	-1.71588	-1.71588
mpzl1	-1.19414	0	-1.19414	-1.19414
dpt	2.36159	2.36159	2.36159	2.36159
prrx1	2.30347	2.30347	2.30347	2.30347
ptpn14	1.63408	0	1.63408	1.63408
esrrg	-1.80023	0	-1.80023	-1.80023
ppp2r5a	1.76064	0	1.76064	1.76064
plxna2	2.17902	0	2.17902	2.17902
olah	-6.10611	0	0	0
mcm10	-1.8901	-1.8901	0	-1.8901
ddr2	2.19206	2.19206	2.19206	2.19206
rgs5	1.95734	1.95734	1.95734	1.95734
vim	1.74248	1.74248	1.74248	1.74248
itga8	-1.15395	-1.15395	-1.15395	0
pfkfb3	2.31957	0	2.31957	2.31957
stxbp1	2.73231	0	0	0
st6galnac6	-1.55825	0	-1.55825	-1.55825
lcn2	-4.6112	-4.6112	-4.6112	-4.6112
dnm1	2.04378	2.04378	2.04378	2.04378
gbgt1	Inf	0	0	0
acvr1c	2.2408	2.2408	2.2408	2.2408
col5a1	2.10084	0	2.10084	0
lamc3	2.731	2.731	2.731	2.731
fam73b	1.36317	0	1.36317	1.36317
hspa5	-1.52369	-1.52369	-1.52369	-1.52369
zeb2	1.71734	1.71734	1.71734	1.71734
gsn	2.56298	2.56298	2.56298	2.56298
agpat2	2.07921	0	2.07921	2.07921
abca2	1.31041	0	0	0
galnt3	-2.90846	-2.90846	-2.90846	-2.90846
stk39	-2.10419	-2.10419	-2.10419	-2.10419
tfpi	2.28127	2.28127	2.28127	2.28127
prrg4	-2.02965	-2.02965	-2.02965	-2.02965
elf5	-2.40281	-2.40281	-2.40281	-2.40281
sema6d	1.11499	1.11499	1.11499	1.11499
fbn1	1.49471	0	0	0
meis2	2.6826	2.6826	2.6826	2.6826
tspan18	2.92877	0	2.92877	2.92877
slc28a2	2.42118	2.42118	0	2.42118
chst1	3.47772	3.47772	3.47772	3.47772
duoxa1	-3.29992	-3.29992	-3.29992	-3.29992
pdia3	-0.988314	0	-0.988314	0
map1a	3.41134	3.41134	3.41134	3.41134
jag1	1.79391	1.79391	1.79391	1.79391
4930402h24rik	1.44296	0	1.44296	1.44296
ivd	1.21656	0	1.21656	1.21656
rassf2	1.61584	0	1.61584	1.61584
pcna	-1.28408	0	0	0
slc20a1	-1.39716	0	0	-1.39716
cpxm1	2.15788	0	0	0
sec23b	-1.28492	-1.28492	0	-1.28492
cd93	1.92379	1.92379	1.92379	1.92379
acss1	-1.71836	-1.71836	-1.71836	-1.71836
fam110a	-2.08319	0	0	0
ccm2l	2.94573	0	2.94573	2.94573
pck1	2.44006	0	2.44006	2.44006
car3	2.96972	2.96972	2.96972	2.96972
car2	-1.982	-1.982	-1.982	-1.982
gss	-1.4987	0	0	0
ect2	-1.59532	0	-1.59532	-1.59532
bche	1.42839	0	1.42839	1.42839
dclk1	1.972	0	1.972	1.972
nbea	-1.40001	0	-1.40001	-1.40001
serp1	-1.86363	-1.86363	-1.86363	-1.86363
mme	1.78527	0	1.78527	1.78527
kcnab1	Inf	0	0	0
npr1	2.52553	2.52553	2.52553	2.52553
slc35a3	-1.16065	0	-1.16065	-1.16065
cyp2u1	3.83944	0	0	3.83944
ctso	1.66397	0	1.66397	0
enpep	2.85884	2.85884	2.85884	2.85884
papss1	-1.52301	-1.52301	-1.52301	-1.52301
ptgfr	3.0451	3.0451	3.0451	0
pear1	2.47093	2.47093	2.47093	2.47093
cd1d1	1.79574	1.79574	1.79574	1.79574
bnipl	-2.34947	-2.34947	-2.34947	-2.34947
tmem56	1.60684	1.60684	1.60684	1.60684
clca2	-3.12279	-3.12279	-3.12279	-3.12279
slc35a1	-1.81113	0	-1.81113	-1.81113
nans	-2.0386	-2.0386	-2.0386	-2.0386
svep1	1.29186	1.29186	1.29186	0
bspry	-2.43488	-2.43488	-2.43488	-2.43488
ptprd	3.79284	3.79284	3.79284	3.79284
mpdz	1.6044	1.6044	1.6044	1.6044
b4galt1	-1.20875	0	-1.20875	-1.20875
aqp7	3.41344	3.41344	3.41344	3.41344
unc13b	-1.17998	0	-1.17998	-1.17998
bnc2	2.38913	2.38913	2.38913	2.38913
ppap2b	1.5593	1.5593	1.5593	1.5593
dnajc6	-2.57407	-2.57407	-2.57407	0
slc5a9	-2.17245	-2.17245	-2.17245	-2.17245
eps15	0.984387	0	0	0
ttc39a	-3.04909	-3.04909	-3.04909	-3.04909
hook1	-1.54483	-1.54483	-1.54483	-1.54483
kcnq4	2.40559	2.40559	2.40559	2.40559
lepre1	1.63726	0	0	0
slc2a1	-2.03132	-2.03132	-2.03132	-2.03132
mycl	4.01434	4.01434	0	0
kif2c	-2.15035	0	-2.15035	-2.15035
pik3r3	-1.74993	0	0	0
tspan1	-2.29964	0	-2.29964	0
cyp4b1	2.6286	2.6286	2.6286	2.6286
hspg2	2.10998	2.10998	2.10998	2.10998
sema3c	1.96748	0	0	0
slc30a2	-6.52975	-6.52975	-6.52975	-6.52975
cdca8	-2.24649	0	-2.24649	-2.24649
arhgef19	-1.52282	0	-1.52282	-1.52282
cdk14	1.63438	1.63438	0	1.63438
padi2	-1.9463	-1.9463	-1.9463	-1.9463
per3	1.7104	1.7104	1.7104	1.7104
abcb1b	3.31909	0	0	3.31909
car6	-9.7111	0	-9.7111	-9.7111
nos3	1.76373	1.76373	1.76373	1.76373
h6pd	2.28356	2.28356	2.28356	2.28356
rbp7	1.94516	0	1.94516	0
mxra8	2.34433	2.34433	2.34433	2.34433
prom1	-1.27457	0	0	0
htra3	2.60131	2.60131	2.60131	0
pcdh7	2.50263	2.50263	2.50263	2.50263
pi4k2b	-1.35361	0	0	0
slc34a2	-4.99492	-4.99492	-4.99492	-4.99492
klb	2.61458	2.61458	2.61458	2.61458
pdgfra	2.01464	2.01464	2.01464	2.01464
tgfbr3	1.15011	1.15011	1.15011	1.15011
spp1	-5.74816	-5.74816	-5.74816	-5.74816
agpat9	2.03484	2.03484	2.03484	2.03484
antxr2	1.23371	0	1.23371	0
alb	Inf	Inf	0	Inf
areg	3.34777	3.34777	0	0
pitpnm2	1.67234	0	1.67234	1.67234
naaa	1.59261	0	1.59261	1.59261
cxcl9	5.53082	0	0	5.53082
aacs	1.1848	0	1.1848	1.1848
mad1l1	-1.38164	0	0	-1.38164
lfng	1.97816	1.97816	0	1.97816
rasal1	-2.78553	0	-2.78553	-2.78553
col1a2	1.96104	0	1.96104	0
fam3c	-2.48829	-2.48829	-2.48829	-2.48829
limk1	1.87422	0	0	0
aass	-4.06712	-4.06712	-4.06712	-4.06712
ahcyl2	1.02789	1.02789	1.02789	1.02789
adcyap1r1	1.73675	1.73675	1.73675	1.73675
fkbp9	1.76062	0	1.76062	1.76062
trim24	1.4329	0	0	0
ptn	2.72861	2.72861	2.72861	2.72861
trpv6	Inf	0	0	0
adamts9	2.1229	2.1229	2.1229	2.1229
rpn1	-1.12378	-1.12378	-1.12378	-1.12378
foxp1	1.0972	0	1.0972	1.0972
chl1	-1.97864	-1.97864	-1.97864	-1.97864
aldh1l1	2.29313	0	2.29313	2.29313
a2m	#NAME?	#NAME?	#NAME?	0
plxnd1	1.76601	1.76601	1.76601	1.76601
adipor2	1.39356	0	1.39356	1.39356
8430419l09rik	-1.78863	0	-1.78863	-1.78863
srgap3	-1.24918	-1.24918	-1.24918	-1.24918
lrmp	2.52138	0	0	0
bcat1	3.64625	0	0	0
etnk1	-1.4891	0	-1.4891	-1.4891
cidec	2.47991	2.47991	2.47991	2.47991
cmas	-1.72943	-1.72943	-1.72943	-1.72943
timp4	3.345	0	3.345	0
scnn1a	2.76703	2.76703	0	0
cd9	-1.04786	-1.04786	-1.04786	0
pglyrp1	-2.99851	0	-2.99851	-2.99851
rhpn2	-2.2928	-2.2928	-2.2928	-2.2928
slc7a10	2.19898	2.19898	2.19898	2.19898
iqgap1	-1.03815	0	-1.03815	-1.03815
plin1	2.42333	2.42333	2.42333	2.42333
nr2f2	2.70214	2.70214	2.70214	2.70214
lrrc28	2.77025	0	0	0
anapc15	-1.55852	0	-1.55852	0
tmc5	-3.77694	-3.77694	-3.77694	-3.77694
pde2a	1.86475	1.86475	1.86475	1.86475
nucb2	-3.07815	-3.07815	-3.07815	-3.07815
pde3b	1.91101	1.91101	1.91101	1.91101
sult1a1	2.6286	2.6286	2.6286	2.6286
pgm2l1	-1.73194	-1.73194	0	-1.73194
chrdl2	-7.25654	0	0	0
slco2b1	1.64102	1.64102	1.64102	1.64102
dgat2	2.63277	0	2.63277	2.63277
tgfb1i1	2.44005	2.44005	2.44005	2.44005
dkkl1	-4.43278	-4.43278	-4.43278	-4.43278
fgfr2	2.10629	2.10629	2.10629	2.10629
plk1	-1.7299	0	-1.7299	-1.7299
chst15	2.85259	0	2.85259	2.85259
acsm5	4.49269	0	4.49269	4.49269
rrm1	-1.34008	-1.34008	-1.34008	-1.34008
mki67	-1.60071	-1.60071	-1.60071	-1.60071
ano1	-1.14082	-1.14082	-1.14082	-1.14082
slc6a14	-3.32252	-3.32252	0	-3.32252
dock11	2.37604	2.37604	2.37604	2.37604
smarca1	2.3859	0	2.3859	2.3859
2610018g03rik	-3.0808	-3.0808	-3.0808	-3.0808
arhgef6	-1.73659	0	0	-1.73659
fgf13	3.50613	3.50613	3.50613	3.50613
aff2	Inf	0	0	0
stard8	1.82715	1.82715	0	0
magt1	-1.01189	0	0	0
srpx2	2.45986	2.45986	2.45986	0
col4a5	-1.21071	0	-1.21071	-1.21071
acsl4	-3.44705	0	-3.44705	-3.44705
zfp275	1.86442	1.86442	1.86442	1.86442
pir	Inf	0	Inf	Inf
figf	3.61101	3.61101	3.61101	3.61101
rnf128	-2.51632	-2.51632	-2.51632	-2.51632
mcf2l	1.21526	1.21526	0	1.21526
rasa3	2.2354	0	2.2354	2.2354
gpr124	1.52042	1.52042	0	1.52042
dlc1	2.30667	2.30667	2.30667	2.30667
plat	1.56346	0	0	1.56346
tenm3	2.68355	2.68355	0	0
galnt7	-2.07331	-2.07331	-2.07331	-2.07331
scrg1	#NAME?	#NAME?	#NAME?	0
sorbs2	-1.78126	0	-1.78126	-1.78126
cdh11	1.71647	0	0	0
ces1f	2.25075	2.25075	2.25075	2.25075
mmp2	2.32454	2.32454	2.32454	0
st3gal2	2.86063	0	2.86063	2.86063
il34	2.59214	2.59214	0	2.59214
slc27a1	2.21494	2.21494	2.21494	2.21494
crispld2	-1.86082	-1.86082	-1.86082	-1.86082
cdh13	2.61897	2.61897	2.61897	2.61897
car7	Inf	0	0	Inf
smpd3	Inf	0	0	Inf
4931406c07rik	-1.3067	0	0	0
taf1d	-1.60162	-1.60162	-1.60162	-1.60162
bmper	2.55412	2.55412	2.55412	0
jam3	3.30099	0	0	3.30099
st14	-1.72963	-1.72963	-1.72963	-1.72963
aplp2	0.926412	0.926412	0.926412	0.926412
thy1	1.98237	0	0	1.98237
trim29	1.8998	0	0	0
oaf	2.24192	0	2.24192	2.24192
clmp	2.31079	2.31079	2.31079	2.31079
st3gal4	2.08655	2.08655	2.08655	2.08655
dixdc1	-2.08503	-2.08503	-2.08503	-2.08503
1600029d21rik	-4.08159	-4.08159	-4.08159	-4.08159
tmprss4	-3.35253	0	0	-3.35253
hyou1	-0.997617	0	-0.997617	0
mcam	1.42712	1.42712	1.42712	1.42712
tmod2	2.36109	2.36109	2.36109	2.36109
gnb5	1.8718	0	0	1.8718
myo1e	-1.14183	0	-1.14183	0
sh3bgrl2	-2.18437	-2.18437	-2.18437	-2.18437
nrg4	2.9016	0	2.9016	2.9016
loxl1	1.89265	1.89265	1.89265	1.89265
car12	-5.61598	-5.61598	-5.61598	-5.61598
rbpms2	3.03845	3.03845	3.03845	3.03845
lctl	3.14812	3.14812	0	0
cmtm6	-1.13388	0	-1.13388	0
pth1r	1.99318	1.99318	1.99318	1.99318
ltf	-3.36346	-3.36346	-3.36346	-3.36346
trib1	-1.40546	-1.40546	-1.40546	-1.40546
arpp21	Inf	0	0	0
scn5a	-2.0049	0	0	0
amotl2	1.39	0	1.39	1.39
abhd5	-2.07236	-2.07236	-2.07236	0
trf	-2.90224	-2.90224	-2.90224	-2.90224
qars	-1.08736	0	-1.08736	-1.08736
colgalt2	3.35685	3.35685	0	3.35685
1700025g04rik	-1.21902	0	0	-1.21902
syde1	3.04912	3.04912	3.04912	3.04912
mansc1	-1.97326	-1.97326	-1.97326	-1.97326
ablim3	2.50011	2.50011	2.50011	2.50011
alas1	1.59155	0	1.59155	1.59155
ank2	2.74685	2.74685	2.74685	2.74685
abcc4	1.75165	1.75165	1.75165	1.75165
pkd1	1.18592	0	0	1.18592
arhgef17	1.21762	0	0	0
rims3	-2.95596	-2.95596	-2.95596	-2.95596
cspg4	1.92327	0	1.92327	1.92327
rasgrp2	2.34263	2.34263	2.34263	2.34263
sox10	-1.6521	-1.6521	-1.6521	-1.6521
nfatc1	1.82478	0	1.82478	1.82478
cdo1	2.66399	0	2.66399	2.66399
gas7	2.06615	2.06615	0	2.06615
atp1a1	-1.1937	0	-1.1937	-1.1937
mgll	1.64458	1.64458	1.64458	1.64458
tie1	1.58483	1.58483	1.58483	1.58483
lpcat2	-2.42959	-2.42959	-2.42959	-2.42959
ttc28	1.94224	1.94224	1.94224	1.94224
shf	-2.3441	-2.3441	-2.3441	-2.3441
duox1	-4.51759	-4.51759	-4.51759	-4.51759
ptprm	2.13479	2.13479	2.13479	2.13479
kctd17	1.78543	1.78543	0	1.78543
ptprf	-1.13727	-1.13727	-1.13727	-1.13727
frrs1	-1.6057	-1.6057	0	-1.6057
antxr1	1.94548	1.94548	1.94548	1.94548
ttc7b	1.52466	0	1.52466	0
arhgef5	-1.26636	-1.26636	-1.26636	-1.26636
rbfox2	1.20341	0	0	0
apol6	1.78382	1.78382	1.78382	1.78382
ndn	2.14741	2.14741	2.14741	2.14741
myo5c	-2.20786	-2.20786	-2.20786	-2.20786
ucp2	-1.57754	0	0	0
b3galt2	2.77169	2.77169	2.77169	2.77169
lgals3bp	2.09797	0	2.09797	0
9430020k01rik	1.79395	1.79395	1.79395	1.79395
slc16a2	-1.3253	0	0	-1.3253
kcnk1	-1.645	-1.645	-1.645	-1.645
fgd5	1.61964	1.61964	1.61964	1.61964
wbscr17	3.65793	0	0	0
tpst1	2.32861	2.32861	0	2.32861
loxl2	2.31713	0	2.31713	0
iqsec1	1.05284	0	0	0
slc26a2	-1.08137	0	-1.08137	-1.08137
plcg2	-1.95697	-1.95697	-1.95697	-1.95697
scara3	2.24329	2.24329	0	2.24329
hdx	Inf	0	0	0
tiparp	2.13763	2.13763	2.13763	2.13763
lrrn1	3.57838	0	0	3.57838
dbn1	1.89374	0	0	1.89374
ttyh2	1.93537	1.93537	1.93537	1.93537
dgkh	2.26367	2.26367	0	2.26367
dusp5	-3.04656	0	-3.04656	-3.04656
scn7a	2.28517	2.28517	2.28517	2.28517
art3	2.92676	2.92676	2.92676	2.92676
fam214a	1.35082	0	0	1.35082
pygo1	4.25231	4.25231	0	4.25231
ushbp1	2.42827	2.42827	2.42827	2.42827
rtkn	-1.34533	0	-1.34533	-1.34533
cebpa	2.06825	2.06825	2.06825	2.06825
secisbp2l	-1.74886	-1.74886	-1.74886	-1.74886
abi3bp	2.13877	2.13877	2.13877	2.13877
foxa1	2.84257	2.84257	2.84257	2.84257
acta2	2.13953	2.13953	2.13953	2.13953
bc005764	-1.78612	-1.78612	0	0
palm	2.83572	2.83572	2.83572	2.83572
zhx3	1.25401	1.25401	1.25401	1.25401
cerk	2.3423	0	0	0
acss3	2.2493	2.2493	2.2493	2.2493
rusc2	1.91336	1.91336	1.91336	1.91336
fam65b	2.28775	2.28775	0	2.28775
meox2	2.71816	2.71816	2.71816	2.71816
znrd1as	Inf	0	0	0
igfbp7	1.80326	1.80326	1.80326	1.80326
slc2a13	3.41012	3.41012	3.41012	0
igsf10	1.90889	1.90889	0	1.90889
glb1l2	2.61897	2.61897	2.61897	2.61897
arsi	4.73863	0	0	0
calm2	-1.17944	-1.17944	-1.17944	-1.17944
lum	2.25163	2.25163	2.25163	2.25163
arhgap26	1.46085	1.46085	1.46085	0
adamts2	2.25816	0	2.25816	0
sh3tc1	1.87041	1.87041	1.87041	1.87041
tmem184a	-1.71457	0	-1.71457	-1.71457
rps27l	-2.10658	0	-2.10658	-2.10658
wnt4	3.50943	3.50943	3.50943	0
dchs1	1.76137	0	1.76137	1.76137
tenc1	2.57946	0	2.57946	2.57946
hk1	-1.86931	-1.86931	-1.86931	-1.86931
frem2	3.48472	3.48472	0	3.48472
tspan15	-1.49938	0	0	0
prkcdbp	2.16018	0	2.16018	2.16018
scd1	2.47406	2.47406	2.47406	2.47406
lrg1	-2.16845	0	-2.16845	-2.16845
sik2	2.1503	0	2.1503	2.1503
tmprss13	-1.82416	-1.82416	-1.82416	-1.82416
aff3	2.66716	2.66716	0	2.66716
islr	2.62664	2.62664	0	0
fgf2	2.14006	2.14006	2.14006	2.14006
spon2	2.79044	2.79044	0	2.79044
cnnm4	-1.62239	0	-1.62239	-1.62239
tbc1d2b	1.5186	1.5186	1.5186	1.5186
pkd2l1	#NAME?	0	0	0
kcnk2	3.54144	0	3.54144	3.54144
cdkn1c	2.48855	2.48855	0	2.48855
inf2	1.51986	1.51986	1.51986	1.51986
esyt3	-2.62128	-2.62128	-2.62128	-2.62128
ppp1r16b	2.74552	0	2.74552	2.74552
tgm2	1.14935	0	1.14935	1.14935
ssh2	1.19676	0	1.19676	1.19676
fgd3	-3.04651	-3.04651	-3.04651	0
wnk2	-1.09432	-1.09432	0	-1.09432
igsf8	-1.33705	0	0	0
cntln	2.26551	2.26551	2.26551	2.26551
cdon	1.88173	1.88173	1.88173	1.88173
snrk	1.75579	1.75579	1.75579	1.75579
sobp	3.96235	3.96235	0	3.96235
kcnh2	3.58402	3.58402	0	3.58402
dennd2a	2.5754	2.5754	2.5754	2.5754
olfml2b	2.29841	0	0	0
c1s	2.34853	2.34853	2.34853	2.34853
cyp24a1	-7.13281	-7.13281	-7.13281	0
capn8	4.34582	4.34582	0	4.34582
fam65a	1.85613	1.85613	0	1.85613
dock10	1.56151	1.56151	0	1.56151
lpar1	1.77506	1.77506	1.77506	1.77506
trps1	-1.35203	-1.35203	-1.35203	-1.35203
dsel	1.21053	0	1.21053	0
lmx1b	1.62221	0	0	0
rap1gap2	-1.89673	0	0	-1.89673
st6galnac5	3.40261	3.40261	3.40261	0
anpep	-1.70874	-1.70874	-1.70874	-1.70874
f13a1	1.58763	0	1.58763	0
gpr126	-1.73261	-1.73261	-1.73261	-1.73261
prune2	2.66273	0	2.66273	2.66273
eltd1	1.7842	1.7842	0	1.7842
1110008p14rik	-1.46639	0	0	0
orm1	1.96137	1.96137	1.96137	1.96137
tgfb2	-1.66668	0	-1.66668	-1.66668
lgi2	4.70345	0	0	4.70345
megf9	1.56883	0	1.56883	1.56883
c130074g19rik	1.30522	1.30522	1.30522	1.30522
prss23	2.25684	0	0	2.25684
dse	1.58619	1.58619	1.58619	1.58619
myo9a	1.03516	0	1.03516	0
rbms3	2.40093	2.40093	2.40093	2.40093
zer1	1.50154	0	0	1.50154
usp53	-1.43201	0	0	0
ldb2	3.44787	0	3.44787	3.44787
arhgap29	1.40978	1.40978	1.40978	1.40978
lrrc17	1.71025	1.71025	1.71025	1.71025
tmem120a	1.80478	1.80478	1.80478	1.80478
cited2	-1.45414	-1.45414	-1.45414	0
dag1	1.02657	0	1.02657	0
mrap	3.39678	0	3.39678	3.39678
hip1	2.04189	2.04189	2.04189	2.04189
tbc1d16	1.57349	1.57349	1.57349	1.57349
slc7a5	-2.45473	-2.45473	-2.45473	-2.45473
ptger3	2.83466	2.83466	2.83466	2.83466
saa3	#NAME?	0	0	0
negr1	2.92796	0	2.92796	2.92796
bmf	-1.94944	0	-1.94944	-1.94944
fmo2	2.89047	2.89047	2.89047	2.89047
fmo1	1.84383	1.84383	1.84383	1.84383
lrp1	1.7956	1.7956	1.7956	1.7956
sema3d	4.54452	0	0	0
ndufa4l2	6.94786	0	0	0
btnl9	2.78069	0	2.78069	2.78069
hey1	-2.48373	-2.48373	-2.48373	-2.48373
alx4	2.5185	2.5185	0	2.5185
cul9	2.07098	2.07098	2.07098	2.07098
5330417c22rik	-4.38728	-4.38728	-4.38728	-4.38728
timd2	-2.62542	-2.62542	-2.62542	-2.62542
plekha4	2.96549	0	2.96549	0
spns2	-1.5267	-1.5267	-1.5267	-1.5267
gstm2	1.95058	1.95058	1.95058	1.95058
abcb1a	2.76534	2.76534	2.76534	2.76534
plekhg1	1.6698	0	0	0
oaz2	1.43769	0	0	0
hmgn1	-1.02116	-1.02116	-1.02116	-1.02116
sh3pxd2b	1.27645	0	0	0
klc3	-1.71824	-1.71824	-1.71824	-1.71824
esrp1	-1.30699	-1.30699	-1.30699	-1.30699
arhgef38	-1.62803	-1.62803	-1.62803	-1.62803
igsf21	Inf	0	0	Inf
npnt	-3.60697	-3.60697	-3.60697	-3.60697
ccdc8	2.81708	0	0	0
cyyr1	1.84097	1.84097	1.84097	1.84097
gpr110	-5.1434	0	0	0
ssr2	-1.12492	0	-1.12492	0
4930506m07rik	-1.68853	0	-1.68853	-1.68853
ccnb1	-2.15861	-2.15861	-2.15861	-2.15861
mfsd6	-1.95694	-1.95694	-1.95694	-1.95694
gk5	-1.76623	-1.76623	-1.76623	-1.76623
mmrn2	2.24975	2.24975	2.24975	2.24975
stx3	-1.65301	0	0	0
sdk2	2.15448	0	0	2.15448
gucy1a2	2.2642	2.2642	2.2642	2.2642
pnpla3	2.37358	0	2.37358	2.37358
slc39a11	-1.49113	-1.49113	0	0
rasl12	2.14838	0	0	0
pgm5	2.62274	0	0	0
kirrel	2.4912	2.4912	2.4912	2.4912
tmem45b	3.01419	3.01419	3.01419	3.01419
pde3a	3.13076	3.13076	0	3.13076
enc1	1.68446	0	0	1.68446
abca9	2.15214	2.15214	2.15214	2.15214
phlda3	1.86635	1.86635	1.86635	1.86635
abca8a	2.17995	2.17995	2.17995	2.17995
fhdc1	-1.43402	0	-1.43402	-1.43402
tmcc2	2.18527	0	0	2.18527
kank3	1.45725	1.45725	0	1.45725
uggt2	1.59411	0	1.59411	0
rassf4	-2.00305	-2.00305	-2.00305	-2.00305
dzip1	2.55995	2.55995	0	2.55995
cmklr1	1.41126	1.41126	1.41126	0
ammecr1	-1.61389	-1.61389	-1.61389	-1.61389
slc26a9	-3.11716	0	-3.11716	-3.11716
itga1	1.61614	1.61614	1.61614	1.61614
stab1	1.28976	0	1.28976	0
sgsm3	-1.34453	0	0	-1.34453
osbpl6	3.46733	0	0	0
adora1	1.84405	0	1.84405	0
clspn	-1.67847	0	0	0
golga7b	Inf	0	0	0
itpr3	-1.45029	-1.45029	-1.45029	-1.45029
wdr55	-1.72703	0	0	-1.72703
garem	-2.67877	-2.67877	-2.67877	-2.67877
wbp5	-1.7457	-1.7457	-1.7457	-1.7457
map3k9	-1.59364	0	-1.59364	-1.59364
id1	2.2263	0	2.2263	2.2263
gpr153	1.84855	0	0	0
synpo	1.20481	0	0	0
tuba1c	-1.80554	-1.80554	-1.80554	-1.80554
a530016l24rik	3.56838	0	3.56838	3.56838
b3galnt1	2.62769	0	0	2.62769
pgp	-1.58633	-1.58633	-1.58633	0
kcns3	3.77285	3.77285	3.77285	3.77285
col6a6	2.58608	0	0	0
ccdc64b	-4.09476	-4.09476	-4.09476	0
mgat2	-1.18089	-1.18089	-1.18089	-1.18089
gpr133	1.76431	1.76431	0	1.76431
fmn1	-1.20672	-1.20672	-1.20672	-1.20672
eml6	2.59986	0	0	0
aqp5	-4.45834	-4.45834	-4.45834	-4.45834
rin3	1.83722	1.83722	0	0
shisa2	1.43671	0	0	0
liph	-3.41942	-3.41942	0	0
fzd1	1.71195	0	0	0
defb1	Inf	Inf	0	Inf
wdr72	-2.68781	-2.68781	-2.68781	-2.68781
prkce	1.87849	0	1.87849	1.87849
s1pr1	2.30285	2.30285	2.30285	2.30285
asxl3	3.09077	3.09077	0	0
insig1	1.12029	0	0	0
sowahb	-2.46643	0	0	-2.46643
zfp423	2.52125	2.52125	2.52125	0
epcam	-1.66828	-1.66828	-1.66828	-1.66828
kcna5	2.4457	2.4457	0	0
basp1	-1.65664	0	-1.65664	-1.65664
a430105i19rik	2.63406	0	2.63406	2.63406
adra1a	3.01942	3.01942	3.01942	3.01942
paip2b	-1.51361	-1.51361	-1.51361	-1.51361
sdpr	2.16331	2.16331	2.16331	2.16331
stard5	-1.63349	0	-1.63349	-1.63349
igfals	-1.7446	0	0	-1.7446
chrm3	-3.45662	-3.45662	-3.45662	-3.45662
tusc5	2.13425	2.13425	2.13425	2.13425
she	2.07826	0	0	2.07826
gjb2	-2.2709	0	-2.2709	-2.2709
kcnk6	-2.04132	0	0	0
sox18	2.4502	0	2.4502	2.4502
kctd4	3.11677	0	3.11677	3.11677
gm5424	-6.03703	-6.03703	-6.03703	-6.03703
cdc42se1	-1.25153	0	-1.25153	-1.25153
fat4	1.9855	1.9855	1.9855	1.9855
fam83h	-1.18298	0	-1.18298	-1.18298
rhoj	1.7529	0	1.7529	1.7529
ttc6	2.99705	2.99705	2.99705	2.99705
fam211b	-1.66948	-1.66948	-1.66948	-1.66948
ckap4	1.50273	0	0	0
cd24a	-1.54341	-1.54341	-1.54341	-1.54341
cdh19	-3.02469	-3.02469	-3.02469	-3.02469
cldn2	-7.41692	-7.41692	-7.41692	-7.41692
kcne4	6.1303	0	0	0
arl4a	1.20406	0	1.20406	1.20406
adamts12	2.5383	2.5383	2.5383	2.5383
cldn4	-1.29476	0	0	0
ust	2.55753	0	0	0
foxi1	-3.50519	-3.50519	0	-3.50519
tshz2	1.91512	1.91512	1.91512	1.91512
arxes2	2.50757	2.50757	2.50757	2.50757
entpd1	1.49357	0	0	0
col6a3	1.53474	0	1.53474	0
dmrt2	5.133	0	5.133	5.133
efcab4a	-1.4056	-1.4056	-1.4056	-1.4056
bdnf	3.56079	3.56079	3.56079	3.56079
8430408g22rik	2.72308	2.72308	2.72308	2.72308
phldb1	1.68197	1.68197	1.68197	1.68197
igf2	5.28083	0	0	5.28083
myof	-0.997638	0	-0.997638	-0.997638
rnf24	1.79116	0	1.79116	1.79116
prex2	1.5038	1.5038	1.5038	1.5038
oxtr	2.82546	2.82546	2.82546	2.82546
gpr81	2.99177	2.99177	2.99177	2.99177
lix1l	1.78841	1.78841	0	1.78841
tenm2	2.81258	2.81258	2.81258	2.81258
krt8	-1.24678	0	-1.24678	0
tsku	2.64331	0	0	0
nckap5	3.50417	0	0	3.50417
rpl36al	-1.56185	0	0	0
armcx4	2.53557	0	2.53557	2.53557
suox	2.22332	0	0	0
apol10b	5.23985	0	0	0
agmo	2.22835	2.22835	2.22835	2.22835
evc2	3.19702	3.19702	0	3.19702
d8ertd82e	1.92036	0	0	0
foxc1	-2.18265	-2.18265	-2.18265	-2.18265
fam228b	Inf	0	0	0
kcnb1	2.9686	0	2.9686	2.9686
trhde	3.77488	3.77488	3.77488	3.77488
hist2h2bb	-1.70567	-1.70567	-1.70567	-1.70567
gja1	1.31066	0	0	1.31066
cited1	3.3225	3.3225	3.3225	3.3225
plcb1	1.75915	1.75915	1.75915	1.75915
msrb3	1.86313	1.86313	1.86313	1.86313
pcdh19	2.06546	2.06546	2.06546	2.06546
ncald	-1.58919	0	-1.58919	-1.58919
cd14	-1.56024	0	0	0
kctd14	-2.35767	0	-2.35767	-2.35767
nlgn2	1.8824	0	0	0
cxx1c	Inf	0	0	0
pard3b	1.73615	1.73615	1.73615	1.73615
dock8	-2.02962	-2.02962	-2.02962	-2.02962
ppap2c	-1.83949	-1.83949	-1.83949	-1.83949
cd177	-4.04054	-4.04054	0	0
bhlha15	-6.52368	-6.52368	-6.52368	-6.52368
mpp3	5.17558	0	0	0
bmpr1b	3.19182	0	0	0
nav2	1.16952	0	0	1.16952
map1b	1.32634	1.32634	1.32634	1.32634
lamb2	1.37949	0	0	1.37949
prkg1	3.24778	3.24778	0	3.24778
arhgef15	2.05044	2.05044	0	2.05044
arhgap20	3.94234	3.94234	3.94234	0
ndfip2	-1.17259	0	0	0
sec61b	-1.51009	0	0	-1.51009
adamts19	3.27191	3.27191	0	0
tnfaip6	4.89157	0	0	0
tcf4	1.38172	1.38172	1.38172	1.38172
sh3pxd2a	1.79379	1.79379	1.79379	1.79379
dusp7	-1.7726	-1.7726	-1.7726	-1.7726
ndst1	-0.930295	0	-0.930295	-0.930295
syne3	2.22993	2.22993	0	2.22993
ceacam10	-4.2733	0	0	-4.2733
msi1	Inf	0	0	Inf
kcnn4	-3.7863	-3.7863	-3.7863	-3.7863
slfn5	1.79456	1.79456	1.79456	1.79456
tmem120b	1.75228	0	1.75228	1.75228
ugt1a6a	2.42419	2.42419	2.42419	2.42419
adam12	2.82842	2.82842	2.82842	2.82842
pla2r1	2.60712	2.60712	2.60712	2.60712
gbp10	3.98219	0	3.98219	3.98219
mettl7a1	1.73816	1.73816	1.73816	1.73816
1600014c10rik	2.05165	2.05165	2.05165	2.05165
emcn	1.49685	1.49685	1.49685	1.49685
lrrc8c	1.97045	1.97045	1.97045	1.97045
actn4	-1.29962	0	-1.29962	-1.29962
cntn1	3.46123	3.46123	0	0
klf2	2.9548	0	0	0
ntrk2	1.81709	1.81709	1.81709	1.81709
tead1	1.28015	1.28015	0	1.28015
tns1	2.45485	2.45485	2.45485	2.45485
maf	2.13395	2.13395	0	2.13395
soga1	1.29077	1.29077	1.29077	1.29077
zcchc24	2.3971	2.3971	2.3971	2.3971
timd4	Inf	0	0	0
gpc3	2.24328	0	0	0
kbtbd11	2.46796	2.46796	2.46796	2.46796
ghr	2.22148	2.22148	2.22148	2.22148
ldoc1l	3.53278	0	0	0
abcd2	2.09451	2.09451	2.09451	2.09451
s100a8	-8.08194	-8.08194	0	-8.08194
st3gal5	-1.95116	0	0	0
b4galt6	-1.45327	0	0	-1.45327
slit3	2.14157	2.14157	2.14157	2.14157
cd248	2.13294	2.13294	2.13294	2.13294
gpr116	2.24334	2.24334	2.24334	2.24334
gulp1	1.73442	1.73442	1.73442	1.73442
ces1d	2.41079	0	2.41079	2.41079
inca1	4.77	0	0	0
slc35f3	3.79065	0	0	0
ero1lb	-1.76165	0	0	0
fxyd3	-1.36953	0	-1.36953	-1.36953
ebf1	2.83369	2.83369	2.83369	2.83369
arhgap24	1.61479	0	1.61479	1.61479
saa2	-8.16716	-8.16716	-8.16716	-8.16716
ece1	1.68417	1.68417	1.68417	1.68417
gnai1	2.68485	2.68485	2.68485	2.68485
megf6	-1.42431	0	0	-1.42431
sema3b	2.80497	2.80497	0	2.80497
palld	1.8587	1.8587	1.8587	1.8587
eml1	1.87737	0	0	1.87737
abce1	-0.97398	0	0	0
scp2-ps2	2.12511	0	0	0
gpc6	1.873	1.873	1.873	1.873
thra	2.01486	2.01486	2.01486	2.01486
cds2	1.26496	1.26496	1.26496	1.26496
mfsd4	-2.7853	-2.7853	-2.7853	-2.7853
pde1a	1.96456	0	1.96456	1.96456
mamld1	2.98201	0	0	0
actg2	3.31747	3.31747	0	0
calcrl	2.00592	2.00592	2.00592	2.00592
dbp	3.05564	3.05564	3.05564	0
ntng1	3.29247	3.29247	0	0
pla2g16	1.20769	1.20769	1.20769	1.20769
b2m	1.75791	0	1.75791	1.75791
mcpt4	7.61911	7.61911	7.61911	0
blnk	-3.0642	-3.0642	-3.0642	-3.0642
cxcl12	1.75195	1.75195	1.75195	1.75195
hipk2	1.40217	1.40217	1.40217	1.40217
kalrn	2.01031	2.01031	2.01031	2.01031
cfd	2.05069	0	2.05069	2.05069
csn1s2a	-5.91185	0	-5.91185	0
qk	1.37952	0	1.37952	1.37952
i830012o16rik	Inf	0	0	0
fabp4	2.21715	2.21715	2.21715	2.21715
rpl7a	-1.21629	0	-1.21629	-1.21629
cav3	Inf	0	0	0
kdr	1.95628	0	1.95628	1.95628
cped1	2.10924	2.10924	2.10924	2.10924
ica1	-2.02163	0	0	-2.02163
csn2	-5.36022	0	-5.36022	0
numbl	3.12019	3.12019	0	3.12019
syne2	0.93665	0	0.93665	0.93665
aox1	1.69361	0	1.69361	1.69361
col23a1	3.37453	0	0	0
rnf183	-5.68572	-5.68572	0	0
fbln2	1.1871	0	1.1871	0
hist1h2bh	-1.53794	-1.53794	-1.53794	-1.53794
ano6	1.10892	0	0	0
chi3l1	-4.83038	-4.83038	-4.83038	-4.83038
mt-nd5	1.1775	0	0	1.1775
sepp1	0.940144	0.940144	0.940144	0.940144
gm22973	-3.8614	-3.8614	0	-3.8614
tacc1	1.04916	0	1.04916	1.04916
dhrs3	1.29834	0	1.29834	1.29834
slc31a2	-1.78095	0	-1.78095	-1.78095
serpina3c	2.7252	2.7252	2.7252	2.7252
scgb2b27	-6.07387	0	-6.07387	-6.07387
zbtb16	1.90713	0	0	0
hmcn1	1.54303	1.54303	1.54303	1.54303
s1pr3	2.41023	2.41023	0	2.41023
pi15	2.36929	2.36929	2.36929	2.36929
myl9	2.72219	2.72219	2.72219	2.72219
sptbn2	-1.26855	-1.26855	-1.26855	-1.26855
lgals1	1.82973	1.82973	1.82973	1.82973
celsr2	-1.32482	0	-1.32482	-1.32482
hist1h2ac	-2.70127	-2.70127	0	-2.70127
marcks	1.06061	0	1.06061	1.06061
ahnak	1.26092	1.26092	1.26092	1.26092
mpzl3	-1.41354	0	0	-1.41354
cyp3a57	3.82617	3.82617	3.82617	3.82617
serpinh1	1.43222	1.43222	1.43222	0
rbm47	-1.60415	-1.60415	-1.60415	-1.60415
cited4	-2.01366	-2.01366	-2.01366	-2.01366
rasgrp3	3.04209	0	3.04209	3.04209
arhgef10	1.91231	1.91231	1.91231	1.91231
sowahc	1.67357	0	1.67357	1.67357
hist1h2ai	-2.03925	-2.03925	-2.03925	-2.03925
bscl2	1.38052	0	1.38052	1.38052
apcdd1	3.5297	3.5297	3.5297	3.5297
tuba1a	1.22831	0	1.22831	0
fam84b	-1.50824	-1.50824	-1.50824	-1.50824
gm10384	-3.85321	-3.85321	-3.85321	-3.85321
sod3	2.11983	2.11983	2.11983	2.11983
ripply1	-7.32283	-7.32283	-7.32283	0
xlr3b	7.35052	0	0	7.35052
h2-d1	1.03214	0	1.03214	1.03214
hbb-bt	2.88509	0	0	2.88509
ttpa	-1.43431	0	0	-1.43431
saa1	-11.0297	-11.0297	-11.0297	-11.0297
adh1	4.35449	4.35449	4.35449	4.35449
spint2	-1.34816	-1.34816	-1.34816	-1.34816
amy1	2.43291	2.43291	2.43291	2.43291
ceacam1	-1.44654	0	-1.44654	0
c5ar2	-3.62624	-3.62624	0	-3.62624
ehd2	2.89167	2.89167	2.89167	2.89167
2610203c20rik	1.88263	0	0	1.88263
bglap3	-3.2576	0	0	0
pdzd8	-1.08954	0	0	0
ankef1	2.37646	0	2.37646	2.37646
hspa12b	2.73297	0	2.73297	2.73297
arrdc3	-0.904453	-0.904453	0	-0.904453
b3galt5	-4.99004	-4.99004	-4.99004	-4.99004
fibin	2.97029	0	0	2.97029
4631405j19rik	-7.29	0	0	0
heg1	1.21408	1.21408	1.21408	1.21408
gm10863	-2.20344	-2.20344	-2.20344	-2.20344
nynrin	3.04586	0	3.04586	3.04586
acsf2	1.87978	1.87978	0	1.87978
ass1	-3.54817	-3.54817	-3.54817	-3.54817
ighm	1.76949	0	0	1.76949
gm16485	2.60369	2.60369	2.60369	0
dnm3os	2.48867	2.48867	2.48867	2.48867
a930039a15rik	3.48331	0	3.48331	3.48331
bnip3	2.27538	2.27538	2.27538	2.27538
1810010h24rik	Inf	0	0	0
1700024p16rik	-2.75875	-2.75875	-2.75875	-2.75875
c030006k11rik	1.91174	0	1.91174	0
ly6c1	2.07176	2.07176	2.07176	2.07176
prnp	2.00436	2.00436	2.00436	2.00436
cyp4v3	2.21474	2.21474	2.21474	2.21474
gm5077	5.44438	0	0	0
gbp4	2.74679	2.74679	0	2.74679
nhsl2	1.82473	1.82473	1.82473	1.82473
muc4	-2.17801	0	0	0
ntn3	4.72733	0	0	0
vamp7-ps	-2.04451	0	-2.04451	0
ai838599	Inf	0	0	Inf
gm12750	-2.98031	0	-2.98031	-2.98031
gm12724	#NAME?	0	0	#NAME?
gm14236	3.63535	0	0	0
1300015d01rik	3.102	0	3.102	3.102
srpx	1.71529	0	1.71529	0
gm3739	Inf	0	0	0
neat1	-1.73887	-1.73887	-1.73887	0
gm20554	-1.0397	0	-1.0397	-1.0397
gnai3	0	0	0	0
pbsn	0	0	0	0
cdc45	0	-1.46126	0	0
scml2	0	0	0	0
apoh	0	0	0	0
narf	0	-0.785171	-0.785171	-0.785171
klf6	0	0	0	0
scmh1	0	0	0	0
cox5a	0	0	0	0
tbx4	0	0	0	0
zfy2	0	0	0	0
ngfr	0	0	2.99283	0
wnt3	0	0	0	0
wnt9a	0	0	0	0
fer	0	0	0	0
xpo6	0	0	0	0
tfe3	0	0	0	0
axin2	0	2.49468	2.49468	2.49468
brat1	0	0	0	0
gna12	0	0	0	0
slc22a18	0	0	0	0
itgb2l	0	0	0	0
pih1d2	0	0	0	0
dlat	0	0	0	0
sdhd	0	0	0	0
fgf23	0	0	0	0
fgf6	0	0	0	0
gpr107	0	0	0	0
nalcn	0	0	0	2.95913
btbd17	0	0	0	0
slfn4	0	0	0	0
th	0	0	0	0
ins2	0	0	0	0
scnn1g	0	0	0	0
drp2	0	0	0	2.99766
tspan32	0	0	0	0
lhx2	0	0	0	0
clec2g	0	0	0	0
gmpr	0	0	0	0
glra1	0	0	0	0
mid2	0	0	0	0
trim25	0	0	0	0
dgke	0	0	0	0
scpep1	0	0	0	0
mnt	0	0	0	0
itgb2	0	0	0	0
pemt	0	0	0	0
cdh1	0	-0.912453	-0.912453	-0.912453
cdh4	0	0	0	0
ckmt1	0	-1.38177	-1.38177	-1.38177
bcl6b	0	2.45498	0	2.45498
clec10a	0	1.60197	1.60197	0
alox12	0	2.3407	0	0
arvcf	0	0	0	0
rtca	0	0	0	0
dbt	0	0	0	0
dazap2	0	0	0	0
mcts1	0	0	0	0
rem1	0	0	0	0
rnf17	0	0	0	0
trappc10	0	0	0	0
ccm2	0	0	0	0
tbrg4	0	0	0	0
tmprss2	0	0	0	0.879426
mx1	0	0	0	0
fap	0	1.75316	1.75316	1.75316
gcg	0	0	0	0
ndufa9	0	0	0	0
egfl6	0	0	0	0
lck	0	0	0	0
tssk3	0	0	0	0
cttnbp2	0	0	0	0
galnt1	0	0	0	0
myf5	0	0	0	0
mkrn2	0	0	0	0
raf1	0	0	0	0
sept1	0	0	0	0
acvrl1	0	0	0	0
grasp	0	0	0	0
acvr1b	0	0	0	0
tom1l2	0	0	0	0
gpa33	0	0	0	0
zfp385a	0	3.03685	3.03685	3.03685
itga5	0	1.20784	0	1.20784
gabra2	0	0	0	0
wdr77	0	0	0	0
adora3	0	0	0	0
atp5f1	0	0	0	0
sox9	0	0	0	0
hnrnpd	0	0	0	0
dynlt1c	0	0	0	0
c1d	0	0	0	0
gm2a	0	0	0	0
krit1	0	0	0	0
clcn4-2	0	0	0	0
vmn2r88	0	0	0	0
grm6	0	0	0	0
sema4f	0	0	0	0
hk2	0	0	0	0
myo18a	0	0	0	0
sez6	0	0	0	0
haao	0	0	0	0
cd52	0	0	0	0
hoxb6	0	0	0	0
loxl3	0	0	0	0
tcl1b5	0	0	0	0
kat2b	0	0	0	0
rab5b	0	0	0	0
cryba1	0	0	0	0
dnmt3l	0	0	0	0
aire	0	0	0	0
icosl	0	0	0	0
spg7	0	0	0	0
sult5a1	0	0	0	0
rpl13	0	0	0	0
chmp1a	0	0	0	0
rpa1	0	0	0	0
tubgcp3	0	0	0	0
oprm1	0	0	0	0
polr3d	0	0	0	0
tcf7	0	0	0	0
ddx3x	0	0	0	0
il12rb1	0	0	0	0
slc5a5	0	0	0	1.23632
kcnn3	0	2.96566	0	2.96566
usp32	0	0	0	0
car4	0	2.47412	2.47412	2.47412
txnrd3	0	0	0	0
fasl	0	0	0	0
znf512b	0	0	0	0
dnajc5	0	0	0	0
tpd52l2	0	0	0	0
fmr1	0	0	0.937	0
bcl11a	0	0	0	-0.75859
il4	0	0	0	0
pxmp4	0	0	0	0
dlg3	0	0	0	0
gnb1l	0	0	0	0
dbh	0	0	0	0
mmp11	0	0	0	0
smarcb1	0	0	0	0
vpreb3	0	0	0	0
hip1r	0	0	0	0
nsun5	0	0	0	0
top1mt	0	0	0	0
hoxa10	0	0	0	0
hoxa4	0	0	Inf	Inf
snrpn	0	0	0	0
slc7a7	0	0	0	0
oxa1l	0	0	0	0
heatr6	0	0	0	0
ccl3	0	0	0	0
icam4	0	0	0	0
ilf2	0	0	0	0
chtop	0	0	0	0
snapin	0	0	0	0
s100a4	0	0	0	0
s100a3	0	0	0	0
s100a5	0	0	0	0
scn4a	0	0	0	0
icam2	0	0	0	2.96297
mapk7	0	0	0	0
epn2	0	0	0	0
b9d1	0	0	0	0
sec24b	0	0	0	0
n4bp3	0	-0.50587	0	0
rmnd5b	0	0	0	0
vps9d1	0	0	0	0
zfp276	0	0	0	0
c1ql4	0	0	0	0
mfsd10	0	0	0	0
luzp1	0	0	0	0
slc13a2	0	0	0	0
kctd10	0	0	0	0
poldip2	0	0	0	0
sebox	0	0	0	0
ift20	0	0	0	0
pcbp3	0	0	0	0
lgals9	0	0	0	0
araf	0	0	0	0
cfp	0	0	0	1.83645
timp1	0	0	0	0
uxt	0	0	0	0
cnnm3	0	0	0	0
lman2l	0	0	0	0
mcm3ap	0	0	0	0
pcnt	0	0	0	0
ftcd	0	0	0	0
mxd1	0	0	0	0
gmcl1	0	0	0	0
snrnp27	0	0	0	0
oas1c	0	0	0	0
oas1h	0	0	0	0
ocrl	0	0	0	0
calm1	0	0	0	0
agpat3	0	0	1.1513	1.1513
slc26a3	0	0	0	0
sema6b	0	0	0	0
uhrf1	0	-1.24724	-1.24724	-1.24724
dpp9	0	0	0	0
gramd1a	0	0	0	0
hpn	0	0	0	0
gabrg1	0	0	0	0
ckb	0	0	0	0.856553
sp1	0	0	0	0
itgb7	0	0	0	2.1345
myg1	0	0	0	0
rarg	0	0	0	0
pfdn5	0	0	0	0
efnb2	0	2.00561	0	0
rrp15	0	0	0	0
rnd2	0	0	0	0
srr	0	0	0	0
sync	0	0	0	0
fndc5	0	0	0	0
fbxo9	0	0	0	0
ccdc132	0	0	0	0
apbb3	0	0	0	0
hars	0	0	0	0
zmat2	0	0	0	0
smg5	0	0	0	0
cct3	0	0	0	0
rhbg	0	0	0	0
0610031j06rik	0	0	0	0
mef2d	0	0	0	0
tmem79	0	0	0	0
slc19a1	0	0	0	0
kpnb1	0	0	0	0
npepps	0	0	0	0
tbx21	0	0	0	0
mrpl10	0	0	0	0
cyp51	0	0	0	0
tcf25	0	0	0	0
tubb6	0	0	0	0
def8	0	0	0	0
meox1	0	0	0	0
sost	0	0	0	0
nkx2-1	0	0	0	0
pax9	0	0	0	0
irx2	0	0	0	0
col1a1	0	0	2.03357	0
itga3	0	0	0	0
sgca	0	0	0	0
dlx3	0	0	0	0
foxm1	0	0	0	0
itfg2	0	0	0	0
nrip2	0	0	2.80094	2.80094
tulp3	0	0	0	0
gtf2h4	0	0	0	0
tubb5	0	0	0	0
jup	0	0	0	0
fkbp10	0	0	0	1.69026
klhl10	0	0	0	0
mnx1	0	0	0	0
nom1	0	0	0	0
ergic1	0	0	0	0
tnk1	0	0	0	-1.23095
acap1	0	0	0	0
tcea3	0	0	0	0
ifrd1	0	0	0	0
stk38l	0	0	0	0
brpf1	0	0	0	0
akr1b3	0	0	0	0
hoxc13	0	0	0	0
hoxc11	0	0	0	0
hoxc6	0	0	2.49802	2.49802
gstt1	0	0	0	0
gstt3	0	0	0	-0.866093
ddt	0	0	0	0
tat	0	0	0	0
ddx18	0	0	0	0
ubl3	0	0	0	0
gramd3	0	0	0	0
eef1e1	0	0	0	0
akt1	0	0	0	0
cldn15	0	0	0	2.49273
il16	0	0	0	0.822765
tcirg1	0	0	0	0
naglu	0	0	0	0
coasy	0	0	0	0
smo	0	0	0	0
tspan33	0	0	0	0
crnkl1	0	0	0	0
folh1	0	0	0	0
chordc1	0	0	0	0
rtcb	0	0	-0.56158	0
pwp1	0	0	0	0
fbxo7	0	0	0	0
capns1	0	0	0	0
lrp3	0	2.50429	2.50429	2.50429
dsg4	0	0	0	0
evx2	0	0	0	0
hoxd13	0	0	0	0
hoxd12	0	0	0	0
clpb	0	0	0	0
sept7	0	0	0	0
zdhhc4	0	0	0	0
rac1	0	0	0	0
nup214	0	0	0	0
aif1l	0	1.97287	0	1.97287
cpa3	0	4.01581	4.01581	0
ltbp1	0	0	0	0
ugp2	0	0	0	0
kcnh6	0	0	0	0
trmt1	0	0	0	0
nacc1	0	0	0	0
nfix	0	0	0	0
uba1	0	0	0	0
siae	0	0	0	0
vsig2	0	0	0	6.58027
spa17	0	0	0	0
fam50a	0	0	0	0
emd	0	0	0	0
taco1	0	0	0	0
grik3	0	0	0	0
npas1	0	0	0	0
sipa1l2	0	0	0	0
ap4e1	0	0	0	0
blvra	0	0	0	0
pdzd4	0	0	0	0
srpk3	0	0	0	0
idh3g	0	0	0	0
pnck	0	0	0	0
ssr4	0	0	0	0
bcap31	0	0	0	0
fam98a	0	0	0	0
ltbp2	0	0	0	-0.413304
kmt2a	0	0	0	0
ift46	0	0	0	0
tmem25	0	0	0	0
cd3g	0	0	0	0
trappc6a	0	0	0	0
supt6	0	0	0	0
spag5	0	-1.22081	-1.22081	-1.22081
foxn1	0	0	0	0
unc119	0	0	0	0
rab34	0	0	0	0
sdf2	0	0	0	0
ccne1	0	0	0	0
hsf2bp	0	0	0	0
bbc3	0	0	0	0
mybpc3	0	0	0	0
psmc3	0	0	0	0
acp2	0	0	0	0.777315
rapsn	0	0	0	0
slc39a13	0	0	0	0
ddb2	0	0	0	0
spi1	0	0	0	0
sf3a1	0	0	0	0
stat6	0	0	0	0
clgn	0	0	0	0
napsa	0	0	0	0
vrk3	0	0	0	0
smg9	0	0	0	0
paxip1	0	0	0	0
rmnd5a	0	0	0	0
mov10	0	0	0	0
ppm1j	0	0	0	0
rhoc	0	0	0	0
4930432k09rik	0	0	0	0
tead3	0	0	0	0
ppard	0	0	0	0
def6	0	0	0	0
peg3	0	0	0	0
zim1	0	2.81084	0	0
metrn	0	0	0	0
lmf1	0	0	0	0
narfl	0	0	0	0
dbf4	0	0	0	-1.49871
daxx	0	0	0	0
cd320	0	0	0	0
ipo4	0	0	0	0
tm9sf1	0	0	0	0
rec8	0	0	0	0
irf9	0	0	0	0
gmpr2	0	0	0	0
mdp1	0	0	0	0
dhrs1	0	0	0	0
ncan	0	0	0	0
tmem161a	0	0	0	0
armc6	0	0	0	0
2310045n01rik	0	0	0	0
slc25a42	0	0	0	0.879068
snx9	0	0	0	0
ranbp3	0	0	0	0
ndufa11	0	0	0	0
bmp8b	0	0	0	0
nr2f6	0	0	0	0
use1	0	0	0	0
ocel1	0	0	0	0
dyrk1b	0	0	0	0
braf	0	0	0	0
ndufb2	0	0	0	0
hltf	0	0	0	0
prpf6	0	0	0	0
rgs19	0	0	0	0
rgs20	0	0	-1.58401	-1.58401
abhd3	0	0	0	0
snrpd1	0	0	0	0
tchp	0	0	0	0
tiam1	0	0	0	-0.630207
tsc2	0	0	0	0
rpl3l	0	0	0	0
slc9a3r2	0	0	0	0
puf60	0	0	0	0
golga2	0	0	0	0
uck1	0	0	0	0.853494
scin	0	0	0	0
ikzf4	0	0	0	0
mien1	0	0	-0.650147	0
pon1	0	0	0	0.447248
tgfb1	0	0	0	0
ccdc97	0	0	0	0
zfp40	0	0	0	0
akap8l	0	0	0	0
shh	0	0	0	0
pdcd2l	0	0	0	0
gtf2f1	0	0	0	0
clpp	0	0	0	0
alkbh7	0	0	0	0
pspn	0	0	0	0
dennd1c	0	0	0	0
med6	0	0	0	0
prkd1	0	0	0	1.57293
lcp2	0	0	0	0
cse1l	0	0	0	0
naa20	0	0	0	0
prkra	0	0	0	0
fkbp7	0	0	0	0
plekha3	0	0	0	0
ykt6	0	0	0	0
baz1b	0	0	0	0
pex6	0	0	0	0
mrpl2	0	0	0	0
mea1	0	0	0	0
gnmt	0	0	0	0
grin2d	0	0	0	0
kdelr1	0	0	0	0
tmem143	0	0	1.69584	0
pdxk-ps	0	0	0	0
ggct	0	0	0	0
btbd6	0	0	0	0
nudt14	0	0	0	0
epdr1	0	0	0	0
flii	0	0	0	0
top3a	0	0	0	0
atg4d	0	0	0	0
qtrt1	0	-0.687748	0	-0.687748
hdgfrp2	0	0	0	0
chaf1a	0	0	0	-1.37789
adprh	0	0	0	0
tmem39a	0	0	0	0
timmdc1	0	0	0	0
mcm2	0	-1.27159	0	-1.27159
tpra1	0	0	0	0
nab1	0	0	0	0
il17ra	0	0	0	0
kcnn1	0	0	0	0
arrdc2	0	0	0	0
ppp1r17	0	0	0	0
map2k7	0	0	0	0
timm44	0	0	0	0
ap2a2	0	0	0	0
pnkp	0	0	0	0
med25	0	0	0	0
clptm1	0	0	0	0
relb	0	0	0	0
tomm40	0	0	0	0
apoe	0	0	0	0
apoc2	0	0	0	0
hbp1	0	0	0	0
prkar2b	0	0	1.78546	1.78546
cdkn1b	0	0	0	0
ap1m1	0	0	0	0
rab8a	0	0	0	0
hmgn2	0	0	0	0
fam32a	0	0	0	0
elf3	0	0	0	0
cyp2c29	0	0	0	0
stard3nl	0	0	0	0
stk11	0	0	0	0
efna2	0	0	0	0
atp5d	0	0	0	0
ppp5c	0	0	0	0
cdk12	0	0	0	0
pafah1b2	0	0	0	0
cnot11	0	0	0	0
slc2a3	0	0	0	0
foxj2	0	0	0	0.924636
sri	0	0	0	0
dgcr2	0	0	0	0
mical3	0	0	0	0
irf3	0	0	0	0
bcl2l12	0	0	0	0
zfp959	0	0	0	0
mpnd	0	0	0	0
sh3gl1	0	0	0	0
ebi3	0	0	0	0
ccdc94	0	0	0	0
ranbp2	0	0	0	0
edar	0	0	0	0
grk5	0	0	0	0
dvl3	0	0	0	0
abcf3	0	0	0	0
eif2b5	0	0	0	0
cyth2	0	0	0	0
sult2b1	0	0	0	0
car11	0	0	0	0
dlgap1	0	0	0	0
hck	0	0	0	0
mrpl4	0	0	0	0
keap1	0	0	0	0
glg1	0	0	0	0
atp8b3	0	0	0	0
btbd2	0	0	0	0
csnk1g2	0	0	0	0
abhd17a	0	0	0	0
mob3a	0	0	0	0
cacnb3	0	0	0	0
ccdc65	0	0	0	0
ddx23	0	0	0	0
pld3	0	0	0	0
grik5	0	2.24608	2.24608	0
cd79a	0	0	0	0
rabac1	0	0	0	0
etv3	0	0	0	0
prkcsh	0	0	0	0
elavl3	0	0	0	0
rab3b	0	0	0	0
st8sia6	0	0	0	0
nosip	0	0	0	0
pih1d1	0	0	0	0
rps11	0	0	0	0
supt5	0	0	0	0
dll3	0	0	0	0
paf1	0	0	0	0
timm50	0	0	0	0
med29	0	0	0	0
bicd1	0	0	0	0
ncstn	0	0	0	0
pex19	0	0	0.965391	0.965391
phyhip	0	0	0	0
crhr2	0	0	0	0
inmt	0	Inf	0	Inf
cyp4f18	0	0	0	0
impdh1	0	0	0	0
psg18	0	0	0	0
dusp3	0	0	0.988373	0.988373
dgcr14	0	0	0	0
slc25a1	0	0	0	0
dgcr6	0	0	0	0
ddr1	0	0	0	0
fosb	0	0	0	0
klc4	0	0	0	0
ercc1	0	0	0	0
cyp17a1	0	0	0	0
as3mt	0	0	0	0
homer3	0	0	0	0
crtc1	0	0	0	0
rnf215	0	0	0	0
aven	0	0	0	0
crot	0	0	0	0
calb2	0	0	0	0
snrnp200	0	0	0	0
ciao1	0	0	0	0
has1	0	0	0	0
taf6l	0	0	0	0
insig2	0	0	0	0
kpna6	0	0	0	0
man1a	0	1.25769	1.25769	1.25769
itpkc	0	0	0	0
adck4	0	0	0	0
brd8	0	0	0	0
kif20a	0	0	-1.19773	-1.19773
farsa	0	0	0	0
gcdh	0	0	0	0
mast2	0	0	0	0
dnase2a	0	0	0	0
rad23a	0	0	0	0
syce2	0	0	0	0
nfat5	0	0	0	0
nob1	0	0	0	0
ppfia3	0	0	0	0
gys1	0	0	0	0
ruvbl2	0	0	0	0
lin7b	0	0	0	0
bax	0	0	0	0
il7r	0	0	0	0
tfam	0	0	0	0
zfp81	0	0	0	0
efnb3	0	0	0	0
fam162a	0	0	0	0
rpl8	0	0	-0.533079	0
grm3	0	0	0	0
fancl	0	0	0	0
brinp2	0	0	0	0
gstm5	0	0	0	0
gstm7	0	0	0	0
gstm3	0	0	0	0
stat3	0	0	-0.359187	0
stat5a	0	0	0	0
map3k11	0	0	0	0
akt2	0	0	1.07199	1.07199
dnaja3	0	0	0	0
hmox2	0	0	0	0
cdip1	0	0	0	0
zak	0	1.62162	0	1.62162
cwc15	0	0	0	0
ppan	0	0	0	0
cacna1e	0	0	0	0
cacna1b	0	0	0	0
trmt10a	0	0	0	0
kifc2	0	0	0	0
psap	0	0	0	0
ikbkg	0	0	0	0
pax2	0	0	0	0
wars2	0	0	0	0
phb2	0	0	0	0
eno2	0	0	0	0
emg1	0	0	0	0
lpcat3	0	0	0	0
atp6v1f	0	0	0	0
il12b	0	0	0	0
clcn5	0	0	0	0
hif3a	0	0	0	0
gpx6	0	0	0	0
gpx5	0	0	0	0
pde1c	0	0	0	0
utp20	0	0	0	0
spic	0	0	0	0
9330159f19rik	0	0	0	0
cul3	0	0	0	0
sst	0	0	0	0
il11	0	0	0	0
large	0	0	0	0
ddx56	0	0	0	0
tmed4	0	0	0	0
col26a1	0	0	0	0
ralb	0	0	0	0
ppp1cc	0	0	0	0
dnajb11	0	0	0	0
tbccd1	0	0	0	0
clec11a	0	0	0	0
zfp324	0	0	0	0
gab2	0	0	0	0
coro1c	0	0	0	0
tax1bp1	0	0	0	0
psg17	0	0	0	0
psg19	0	0	0	0
ctse	0	0	0	0
ndrg2	0	0	0	0
mettl17	0	0	0	0
arhgef40	0	0	0	0
pnpla6	0	0	0	0
mcoln1	0	0	0	0
arhgef18	0	0	0	0
pkn2	0	0	0	0
cd33	0	0	0	0
etfb	0	0	0	0
nkg7	0	0	0	0
lim2	0	0	0	0
stxbp2	0	0	-0.895639	-0.895639
pcp2	0	0	0	0
wwox	0	0	0	0
slbp	0	0	0	0
tyr	0	0	0	0
ghrhr	0	0	0	0
arid3b	0	0	0	0
cnn2	0	0	0	0
polr2e	0	0	0	0
abca13	0	0	0	0
myo9b	0	0	0	0
hdac9	0	0	0	2.11573
ly9	0	0	0	0
cd244	0	0	0	0
emr1	0	0	0	0
mtfp1	0	0	0	0
rab23	0	0	0	0
rab11a	0	0	0	0
eif2b2	0	0	0	0
dlst	0	0	0	0
pgf	0	0	0	-1.3324
ulk2	0	0	0	0
ccl24	0	Inf	0	0
dgkq	0	0	0	0
tmed11	0	0	0	0
grap	0	2.11028	0	2.11028
pou1f1	0	0	0	0
chmp2b	0	0	0	0
plod3	0	0	0	0
ap1s1	0	0	0	0
mapk13	0	0	-0.466951	0
srpk1	0	0	0	0
pax3	0	0	0	0
lbr	0	0	0	0
nes	0	0	0	-0.507034
bcan	0	0	0	0
hapln2	0	0	0	0
prcc	0	0	0	0
rrnad1	0	0	0	0
hdgf	0	0	0	0
slc25a18	0	0	0	0
apba3	0	0	0	0
matk	0	0	0	0
pias4	0	0	0	0
map2k1	0	0	0	0
sgta	0	0	0	0
nmrk2	0	0	0	0
tmem242	0	0	0	0
dtx2	0	0	0	1.28548
zp3	0	0	0	0
hspb1	0	0	0	0
rasa4	0	0	2.41193	2.41193
syt5	0	0	0	0
hnrnpa2b1	0	0	0	0
fxyd4	0	0	0	0
ccdc130	0	0	0	0
mri1	0	0	0	0
prkacb	0	0	0	0
sgsh	0	0	0	0
chd5	0	0	0	0
cstb	0	0	0	0
sh2b2	0	0	1.71899	0
pex5	0	0	0	0
jkamp	0	0	0	0
cd44	0	0	0	-0.788403
slc1a2	0	0	0	0
eif2ak4	0	0	0	0
wdr1	0	0	0	0
wisp1	0	0	0	0
ndrg1	0	0	0	0
4930550c14rik	0	0	0	0
man2b1	0	0	0	0
klf5	0	0	0	0
wdr83	0	0	0	0
prdx2	0	0	0	0
polr2a	0	0	0	0
shbg	0	0	0	0
senp3	0	0	0	0
corin	0	0	0	0
plekha8	0	0	0	0
g6pc2	0	0	0	0
spc25	0	0	0	0
dnah2	0	0	0	0
ripk4	0	0	0	-0.950783
ufd1l	0	0	0	0
zfp287	0	0	0	0
prlr	0	0	0.680027	0
letm1	0	0	0	0.0894724
ubqln1	0	0	0	0
fgfr4	0	0	0	0
cadm3	0	0	0	0
fcer1a	0	0	0	0
txn2	0	0	0	0
casp14	0	0	0	0
slc1a6	0	0	0	0
crbn	0	0	0	0
il5ra	0	0	0	0
msh6	0	0	0	0
fbxo11	0	0	0	0
mlxipl	0	0	2.36119	2.36119
tbl2	0	0	0	0
wbscr22	0	0	0	0
hmox1	0	0	0	0
mprip	0	0	0	0
cic	0	0	0	0
pafah1b3	0	0	-0.206983	0
il27ra	0	0	0	0
prkaca	0	0	0	0
asf1b	0	0	0	-0.621015
myl10	0	0	0	0
dnajb1	0	0	0	0
msh4	0	0	0	0
usp40	0	0	0	0
evx1	0	0	0	0
kbtbd4	0	0	0	0
celf1	0	0	0	0
ndufs3	0	0	0	0
insr	0	0	0.693435	0.693435
fcer2a	0	0	0	0
cyp2a5	0	0	0	0
atp4a	0	0	0	0
trim28	0	0	0	0
ube2m	0	0	0	0
adcy9	0	0	0	0
mef2c	0	0	0	0
ctr9	0	0	0	0
eif4g2	0	0	0	0
[truncated: 31,744 more rows]

## Sheet: ST3
Supplementary Table 3. Hallmarks of cancer and enriched terms.
Hallmark of Cancer - Category	Enriched Terms
Sustaining proliferative signaling	regulation of transcription dna-templated	transcription dna-templated	positive regulation of transcription from rna polymerase ii promoter	intracellular signal transduction	signal transduction	positive regulation of gene expression	dna replication	cell differentiation	cell proliferation	positive regulation of cell proliferation	regulation of rho protein signal transduction	small gtpase mediated signal transduction	regulation of rho protein signal transduction	positive regulation of gtpase activity	positive regulation of nf-kappab transcription factor activity	positive regulation of i-kappab kinase/nf-kappab signaling	anterior/posterior pattern specification	heart development	multicellular organismal development	MAPK signaling pathway	Pathways in cancer
Evading growth suppressors	negative regulation of transcription dna-templated	regulation of transcription dna-templated	transcription dna-templated	negative regulation of transcription from rna polymerase ii promoter	intracellular signal transduction	signal transduction	dna replication	cell proliferation	regulation of rho protein signal transduction	small gtpase mediated signal transduction	regulation of rho protein signal transduction	positive regulation of gtpase activity	Pathways in cancer
Activating invasion and metastasis	transmembrane transport	ion transport	transport	phosphorylation	endocytosis	ion transmembrane transport	proteolysis	protein dephosphorylation	regulation of rho protein signal transduction	small gtpase mediated signal transduction	regulation of rho protein signal transduction	cell-matrix adhesion	homophilic cell adhesion	cell adhesion	positive regulation of cell migration	cell migration	positive regulation of gtpase activity	Cell adhesion molecules (CAMs)	Regulation of actin cytoskeleton	Tight junction	Pathways in cancer	ossification	Osteoclast differentiation
Enabling replicative inmortality	regulation of rho protein signal transduction	small gtpase mediated signal transduction	regulation of rho protein signal transduction	positive regulation of gtpase activity	positive regulation of nf-kappab transcription factor activity	positive regulation of i-kappab kinase/nf-kappab signaling	Pathways in cancer
Inducing angiogenesis	angiogenesis	regulation of rho protein signal transduction	small gtpase mediated signal transduction	regulation of rho protein signal transduction	positive regulation of gtpase activity	Pathways in cancer
Resisting cell death	regulation of rho protein signal transduction	small gtpase mediated signal transduction	regulation of rho protein signal transduction	positive regulation of gtpase activity	positive regulation of i-kappab kinase/nf-kappab signaling	Pathways in cancer
Reprogramming Energy Metabolism	glucose metabolic process	carbohydrate metabolic process	lipid metabolic process	Pathways in cancer
Evading Immune Detection	positive regulation of nf-kappab transcription factor activity	inflammatory response	cellular response to dna damage stimulus	inflammation mediated by chemokine and cytokine signaling pathway	Pathways in cancer
Neural Genetics	nervous system development	neuron migration	neuron projection development	axon guidance	Axon guidance	Glutamatergic synapse	alzheimer disease-presenilin pathway	nicotinic acetylcholine receptor signaling pathway

## Sheet: ST4
Supplementary Table 4. Novel miRNAs and their targets.
miRNAs	Targets
mmu-mir-674	ANGPTL2,HIF3A,ADAM19,FLI1,TIMP2,IGFBP4,PMP22,SEC14L4,MOXD1,DRAM1,SHC2,ADCY3,CYGB,MYH10,IRF4,GCNT2,PPARA,SLC38A4,ABCC5,ACY3,PODXL,FAM195A,ITIH5,FAM129A,ACVR1C,CD93,RECK,CXCL15,AHCYL2,PDE2A,FGF13,GNAO1,EGLN1,TMOD2,HEYL,LGI4,MYOM3,PPP1R16B,RGS4,ATF5,RCAN2,RBMS3,PTGER3,PGM5,FAT4,PREX2,MTCL1,CYP2J6,ADAMTSL1
mmu-mir-669d	DLAT,ENSMUSG00000019769,RYR2,HAS2,PAQR8,CAPN2,4930402H24RIK,CD93,SSPN,HPGD,RBMS3,KLHL31,SYNPO2,ZFP831,MED12L,ACBD4
mmu-mir-297a	CAV2,SSBP2,STEAP4,IRF4,GCNT2,HAS2,SLC38A4,PAQR8,ABLIM2,JAM3,HEYL,PYGO1,BMP6,2010003K11RIK,DZIP1,MED12L
mmu-mir-669l	ADAMTS1,BMPER,RBMS3,FAM13C,NLGN2
mmu-mir-297c	SSBP2,IRF4,GCNT2,ANK,ABLIM2,MRAS,FHOD3,PYGO1,BMP6,2010003K11RIK,DZIP1,NCR1
mmu-mir-877	CAV2,HIF3A,TIMP3,DOC2B,MYH10,LRRC16B,FSTL1,ABCC5,MYLK,CCRN4L,KIF5C,NPR2,GPX7,ADAMTS9,CHRDL1,TMOD2,TPST1,LUM,ATF5,COL6A6,DMRT2,OSR1,LONRF2,PDP1,OLFML1,NLGN2,ACBD4,ENSMUSG00000064043
mmu-mir-467a	CAV2,MMP11,PEX19,ST3GAL1,RXRG,JPH2,MFSD3,DRAM1,MYH10,IRF4,HAS2,PPARA,CCRN4L,CPN2,MMP19,CRISPLD1,SNCA,KIF5C,PKN3,ACVR1C,HOXD8,ENPEP,RECK,SEMA3A,PDGFRA,QPRT,TMEM159,FGF13,ARHGAP6,EGLN1,MAP4,LUM,PPP1R16B,ACER2,RGS4,FAM65A,MYL6B,BEGAIN,S1PR1,FAT4,OSR1,PREX2,SYNPO2,LRRC4C,ENSMUSG00000054580
mmu-mir-467c	CAV2,JPH2,MYH10,DPYSL3,ACVR1C,HOXD8,AHCYL2,TMEM159,MAP4,FHOD3,LUM,ACER2,CNST,RCAN2,BEGAIN,S1PR1,FAT4,ST6GALNAC3
mmu-mir-467d	PEX19,FLI1,JPH2,CRISPLD1,ITIH5,HOXD8,ENPEP,COL15A1,RECK,CLCN6,PDGFRA,HPGD,ENSMUSG00000031811,BEGAIN,FAM13C,S1PR1,PLEKHM3
mmu-mir-677	KCNC2
mmu-mir-201	EFNB2,ANGPTL2,IKZF3,AOC3,NFKBIE,MYOT,CRISPLD1,SSPN,AW551984
mmu-mir-702	VSIG2,PRODH,CADM3,STEAP4,SHC2,RGCC,PDLIM2,HDAC7,ABCC5,SYT7,SPEG,PLXND1,CRELD1,SYP,IL34,DNAH8,LY6D,PPP1R16B,DZIP1,FAT4,PLA2G4E,SYNPO2,ISLR2,PLEKHM3,CYP2J6,MED12L,ACBD4
mmu-mir-7a	BCL6B,SSBP2,ANGPTL2,HIF3A,HDAC9,RASA4,CADM3,ADAM19,STEAP4,IGFBP4,LAMA4,WIF1,GLT8D2,IRF4,RGS7BP,PDLIM2,HAS2,SLC38A4,CCRN4L,LVRN,SYT7,ACY3,MMP19,PODXL,PAQR8,GSTA3,ACADL,MARK1,PHYH,4930402H24RIK,ENPEP,TMEM56,MPDZ,SEMA3A,ABLIM2,CXCL15,AHCYL2,ADAMTS9,PLXND1,ANK1,IL34,TMOD2,MAP4,HEYL,PTPRM,PPP1R18,ACER2,DENND2A,PRDM16,DSE,RBMS3,PGM5,2010003K11RIK,DENND4B,ABCB4,HIC1,FAM13C,EMX2,CCBE1,FAT4,DMRT2,LRRC4C,M…
mmu-mir-130b	PHYHIP,SSBP2,MLXIPL,ADAM19,TIMP2,SEC14L4,LAMA4,RGS7BP,PPARA,ABCC5,ADAMTS1,CCRN4L,ITIH5,HC,HOXD8,ANGPT2,HPGD,BMPER,TMOD2,THSD7A,PTPRM,ACER2,KLHL31,S1PR1,OSR1,AGTR1A,PCDH20,LRRC4C,MTCL1
mmu-mir-1968	PODXL,COL15A1,PDGFRA,EIF4EBP1,ANK1,PGM5
mmu-mir-466f	CHRNA1
mmu-mir-135a	GREM2
mmu-mir-592	KIF20A,ARFGEF3,MBOAT2,2010111I01RIK,ILDR1,CLEC4N,PSD2,TNFRSF11A,CHL1,PYCARD,ATP13A4,NPNT,TBC1D30
mmu-mir-1963	APLP1
mmu-mir-493	MUC20,SAMD12
mmu-mir-322	TPD52L1,ELL2,KIF20A,GDPD2,SLC5A8,HOOK1,TSPAN1,CHL1,CRISPLD2,SH3BGRL2,CX3CR1,SAMD12
mmu-mir-154	SLC5A8
mmu-mir-382	SLC5A8,ESCO2,HOOK1,CHL1,CERS3,CRISPLD2
mmu-mir-370	TPD52L1,UBE2C,ELL2,HAVCR2,2010111I01RIK,HN1L,MAL2,ST6GALNAC6,PROM1,CHL1,LRRC1,SOX10,GDF5,GM14137
mmu-mir-665	ACSS1,DEB1,ATP1A1
mmu-mir-341	TPD52L1,BNIPL,CHL1
mmu-mir-410	CDC45,ELL2,KIF20A,IL7R,CACNA1B,NEU1,ADAT2,PKIB,E2F7,PHACTR3,PTPN22,HOOK1,PROM1,CHL1,PGM2L1,ATP6AP2,SH3BGRL2,ATP1A1,ATF7IP2,NPNT
mmu-mir-329	TPD52L1,UBE2C,ELL2,ELAVL2,RAB3D,GDPD2,TOP2A,2010111I01RIK,SRD5A1,CDCA3,HN1L,AURKA,HOOK1,PROM1,CXCL1,CHL1,RAD51AP1,KLK10,PGM2L1,PLK1,ATP6AP2,SH3BGRL2,CSPG5,NPNT,ZFAND4,ENSMUSG00000047643,ST3GAL5,SAMD12,NKPD1
mmu-mir-411	ACSS1,CHL1,SH3BGRL2,DEB1
mmu-mir-184	SLC25A13
mmu-mir-499	PPP1CB
mmu-mir-598	CD44,CDCA3,TMPRSS4,ZFP395,RWDD2B
mmu-mir-378b	ACSS1
mmu-mir-381	ELL2,KIF20A,CACNA1B,PKIB,SLC5A8,E2F7,ESCO2,PTPN22,SH3BGRL2
mmu-mir-504	TPD52L1,RAB3D,2010111I01RIK,CLEC4N,SECTM1A,NANS,CHL1,CERS3,PGM2L1,RIMS3,HID1,EGLN3,TBC1D30

## Sheet: ST5
Supplementary Table 5. Functional enrichment analysis.
Week 6
GOBiologicalProcess
Id	Items	Support	List size	Reference Support	Reference size	pValue	FDR	Genes
1	transcription dna-templated	8	76	1614	37681	0.0159554	0.0358996	PPARA,ZFP618,NFATC2,HLF,PRDM16,MED12L,HDAC9,SSBP2
2	multicellular organismal development	6	76	872	37681	0.00837426	0.0251228	DZIP1,HOXD8,DKK3,TNFRSF11A,EFNB2,PAQR8
3	regulation of transcription dna-templated	9	76	1738	37681	0.00818208	0.0294555	PKNOX2,PPARA,ZFP618,NFATC2,HLF,PRDM16,MED12L,HDAC9,SSBP2
4	transport	11	76	1620	37681	0.000393126	0.00353813	SLC12A5,RAB39B,ABCC5,SLC38A4,CYGB,CACHD1,STEAP4,CLCN6,RAB34,CHRNA1,SYT6
7	ion transport	6	76	553	37681	0.000891904	0.00535143	SLC12A5,SLC38A4,CACHD1,STEAP4,CLCN6,CHRNA1
8	transmembrane transport	4	76	444	37681	0.0125322	0.0322257	SLC12A5,ABCC5,SLC38A4,CLCN6
9	ion transmembrane transport	3	76	331	37681	0.0294943	0.0442415	SLC12A5,CLCN6,CHRNA1
10	cell differentiation	4	76	570	37681	0.0282903	0.0462932	DZIP1,PRDM16,EFNB2,PAQR8
13	negative regulation of transcription from rna polymerase ii promoter	4	76	490	37681	0.0173761	0.0347522	PPARA,HOXD8,PRDM16,HDAC9
15	cell adhesion	7	76	450	37681	3.5551e-05	0.000639918	PODXL,PCDH10,NFASC,BCAM,EFNB2,CADM3,LAMA4
16	angiogenesis	3	76	159	37681	0.00413669	0.0186151	ENPEP,EFNB2,S1PR1
17	cellular response to dna damage stimulus	3	76	308	37681	0.0245334	0.0441602	APTX,NFATC2,REV3L
PantherPathways
Id	Items	Support	List size	Reference Support	Reference size	pValue	FDR	Genes
0	nicotinic acetylcholine receptor signaling pathway	3	76	61	37681	0.00026086	0.00026086	MYH10,CHRNA1,MYO9A
Week 8
GOBiologicalProcess
Id	Items	Support	List size	Reference Support	Reference size	pValue	FDR	Genes
1	transcription dna-templated	11	93	1614	37681	0.00209606	0.0068122	ETV1,PPARA,ARNT2,ZFP287,MED12L,IRF4,HDAC9,SSBP2,MLLT3,OSR1,HEYL
2	multicellular organismal development	10	93	872	37681	5.98253e-05	0.000777729	CHL1,HOXD8,NPNT,TNFRSF11A,4930506M07RIK,EFNB2,PAQR8,HEYL,MMP19,WNT9A
3	regulation of transcription dna-templated	11	93	1738	37681	0.003694	0.00873128	ETV1,PPARA,ARNT2,ZFP287,MED12L,IRF4,HDAC9,SSBP2,MLLT3,OSR1,HEYL
4	anterior/posterior pattern specification	3	93	119	37681	0.00324066	0.00842571	HOXD8,MLLT3,WNT9A
8	positive regulation of transcription dna-templated	5	93	510	37681	0.00873677	0.0151437	ETV1,PPARA,ARNT2,ZFP287,IRF4
10	transmembrane transport	4	93	444	37681	0.0244404	0.0334448	SLC12A5,SLC1A2,ABCC5,SLC38A4
11	positive regulation of gtpase activity	3	93	175	37681	0.0094121	0.0152947	TIAM2,ARHGAP6,RGS4
12	cell differentiation	6	93	570	37681	0.002931	0.00846733	CHL1,NPNT,EFNB2,PAQR8,OSR1,MMP19
13	nervous system development	4	93	279	37681	0.00512776	0.0111101	CHL1,SLC1A2,EFNB2,HDAC9
14	positive regulation of transcription from rna polymerase ii promoter	6	93	643	37681	0.00525346	0.0105069	PPARA,ARNT2,S1PR1,IRF4,OSR1,HEYL
15	proteolysis	5	93	559	37681	0.0126108	0.0192872	ENPEP,PM20D1,ADAM19,2010111I01RIK,MMP19
17	negative regulation of transcription from rna polymerase ii promoter	6	93	490	37681	0.00137737	0.00716233	PPARA,HOXD8,XPO1,HDAC9,OSR1,WNT9A
18	lipid metabolic process	3	93	227	37681	0.018824	0.0271902	PPARA,ACER2,SERINC5
19	heart development	3	93	157	37681	0.00700149	0.0130028	ADAM19,HDAC9,OSR1
21	cell adhesion	9	93	450	37681	1.80885e-06	4.70302e-05	CHL1,PODXL,NPNT,MPDZ,CD93,EFNB2,CADM3,FAT4,LAMA4
22	angiogenesis	4	93	159	37681	0.000665655	0.00432676	ENPEP,EFNB2,S1PR1,MMP19
23	axon guidance	3	93	100	37681	0.00197932	0.00735176	CHL1,ETV1,MYH10
24	neuron migration	3	93	90	37681	0.00146381	0.00634319	CHL1,MARK1,MYH10
25	homophilic cell adhesion	3	93	68	37681	0.000649381	0.00562797	CHL1,CADM3,FAT4
KEGGPathways
Id	Items	Support	List size	Reference Support	Reference size	pValue	FDR	Genes
0	Pathways in cancer	5	93	321	37681	0.00122555	0.00245111	ARNT2,FGF12,WNT9A,FGF13,LAMA4
1	Regulation of actin cytoskeleton	4	93	212	37681	0.0019235	0.0019235	MYH10,FGF12,TIAM2,FGF13
Week 10
GOBiologicalProcess
Id	Items	Support	List size	Reference Support	Reference size	pValue	FDR	Genes
0	cell migration	3	139	116	37681	0.00919145	0.0179651	PODXL,ENPEP,SNAI2
1	positive regulation of cell migration	3	139	115	37681	0.00897759	0.0183827	PODXL,SNAI2,S1PR1
3	carbohydrate metabolic process	3	139	174	37681	0.026841	0.04122	PGM2L1,PGM5,B4GALT1
4	transcription dna-templated	16	139	1614	37681	0.000315329	0.00150657	KLHL31,MYCBP2,PPARA,MLXIPL,SNAI2,FOSL2,NFATC2,ZFP287,MED12L,IRF4,HDAC9,SSBP2,OSR1,HEYL,IKZF2,DACH2
5	multicellular organismal development	15	139	872	37681	8.85206e-07	1.90319e-05	CHL1,JPH2,DZIP1,SNAI2,NDRG4,HOXD8,TNFRSF11A,EFNB2,PAQR8,CHRDL1,TRAF4,TNFSF11,HEYL,DACH2,EDA
6	regulation of transcription dna-templated	17	139	1738	37681	0.00023718	0.00169979	PKNOX2,KLHL31,MYCBP2,PPARA,MLXIPL,SNAI2,FOSL2,NFATC2,ZFP287,MED12L,IRF4,HDAC9,SSBP2,OSR1,HEYL,IKZF2,DACH2
9	neuron projection development	4	139	76	37681	0.000185143	0.00159223	CHL1,STX3,PTPRM,MYH10
10	transport	12	139	1620	37681	0.0170038	0.0292465	RAB39B,MTTP,ABCC5,SLC38A4,STX3,CMAH,STEAP4,KCNC1,SEC14L4,SYT2,CHRNA1,MFSD7C
12	signal transduction	14	139	2190	37681	0.031835	0.0472036	PLK2,TIAM2,ANGPTL2,ARHGAP6,PTPRM,ACVR1C,RGS3,S1PR1,AKAP12,ANK1,TRAF4,MYO9A,MRAS,PKN3
13	positive regulation of transcription dna-templated	7	139	510	37681	0.00294362	0.00744563	SALL1,PPARA,MLXIPL,FOSL2,NFATC2,ZFP287,IRF4
16	positive regulation of gtpase activity	5	139	175	37681	0.000496634	0.00194139	TIAM2,ARHGAP6,RGS3,MYO9A,RGS4
17	cell differentiation	9	139	570	37681	0.000280292	0.00150657	CHL1,DZIP1,ACVR1C,EFNB2,PAQR8,CHRDL1,TNFSF11,OSR1,EDA
18	nervous system development	4	139	279	37681	0.0201233	0.0332808	CHL1,EFNB2,CHRDL1,HDAC9
20	positive regulation of transcription from rna polymerase ii promoter	10	139	643	37681	0.000145046	0.00155924	SALL1,PPARA,MLXIPL,NFATC2,S1PR1,IRF4,TNFSF11,OSR1,HEYL,IKZF2
22	proteolysis	7	139	559	37681	0.00484393	0.0109626	ADAMTS1,ENPEP,PM20D1,ADAM19,ADAMTS9,2010111I01RIK,CAPN2
24	negative regulation of transcription from rna polymerase ii promoter	8	139	490	37681	0.000492477	0.00211765	SALL1,PPARA,BCL6B,MLXIPL,SNAI2,HOXD8,HDAC9,OSR1
25	lipid metabolic process	4	139	227	37681	0.0101461	0.0189687	MTTP,PPARA,ACER2,HPGD
26	heart development	4	139	157	37681	0.00279343	0.00750736	SALL1,ADAM19,HDAC9,OSR1
30	cell adhesion	13	139	450	37681	1.41004e-08	6.06318e-07	CHL1,PODXL,MPDZ,PTPRM,CD93,BCAM,EFNB2,CADM3,FAT4,NLGN2,PGM5,LAMA4,B4GALT1
31	positive regulation of i-kappab kinase/nf-kappab signaling	3	139	98	37681	0.00578653	0.012441	PLK2,TNFSF11,EDA
32	angiogenesis	3	139	159	37681	0.0212714	0.0338768	ENPEP,EFNB2,S1PR1
33	positive regulation of nf-kappab transcription factor activity	3	139	72	37681	0.0024324	0.00697289	TNFRSF11A,TNFSF11,EDA
34	endocytosis	3	139	130	37681	0.0125001	0.0223961	FNBP1L,ITSN1,CAV2
35	neuron migration	3	139	90	37681	0.00456606	0.0109078	CHL1,MARK1,MYH10
36	small gtpase mediated signal transduction	3	139	191	37681	0.0340035	0.0487383	RAB39B,ITSN1,MRAS
37	regulation of rho protein signal transduction	3	139	58	37681	0.00130663	0.00432194	ITSN1,TIAM2,PREX2
39	intracellular signal transduction	6	139	237	37681	0.000260005	0.00159717	ITSN1,TIAM2,PLEKHM3,PREX2,ADCY3,MYO9A
40	ossification	3	139	69	37681	0.00215413	0.00661627	TNFRSF11A,CHRDL1,TNFSF11
41	glucose metabolic process	3	139	53	37681	0.00100542	0.00360277	PPARA,PGM2L1,PGM5
42	homophilic cell adhesion	4	139	68	37681	0.000120233	0.00172335	CHL1,PTPRM,CADM3,FAT4
KEGGPathways
Id	Items	Support	List size	Reference Support	Reference size	pValue	FDR	Genes
0	Cell adhesion molecules (CAMs)	4	139	143	37681	0.00199261	0.0179335	NLGN2,PTPRM,CADM3,CD8A
1	Tight junction	3	139	132	37681	0.0130213	0.0234384	MYH10,MRAS,MPDZ
4	Osteoclast differentiation	3	139	116	37681	0.00919145	0.0275743	FOSL2,TNFRSF11A,TNFSF11
7	Regulation of actin cytoskeleton	4	139	212	37681	0.00803498	0.0361574	MYH10,MRAS,TIAM2,FGF13
8	Axon guidance	3	139	130	37681	0.0125001	0.0281253	RGS3,EFNB2,NFATC2
PantherPathways
Id	Items	Support	List size	Reference Support	Reference size	pValue	FDR	Genes
0	nicotinic acetylcholine receptor signaling pathway	4	139	61	37681	7.85995e-05	7.85995e-05	MYH10,CHRNA1,MYO9A,STX3
Week 12
GOBiologicalProcess
Id	Items	Support	List size	Reference Support	Reference size	pValue	FDR	Genes
0	cell migration	3	152	116	37681	0.0117007	0.025073	PODXL,ENPEP,CCDC88A
1	positive regulation of cell migration	3	152	115	37681	0.0114313	0.0257205	PODXL,S1PR1,INSR
3	response to drug	3	152	123	37681	0.0136889	0.0267825	SLC1A2,PTPRM,NFATC2
4	protein dephosphorylation	3	152	118	37681	0.0122505	0.0250577	PTPRM,PPM1L,PTPRO
5	transcription dna-templated	14	152	1614	37681	0.00588085	0.0165399	KLHL31,PPARA,MLXIPL,NFATC2,ARNT2,HLF,MED12L,RUNX2,IRF4,HDAC9,SSBP2,MLLT3,OSR1,HEYL
6	multicellular organismal development	15	152	872	37681	2.74809e-06	6.18321e-05	CHL1,JPH2,DZIP1,EFNB1,NDRG4,HOXD8,NPNT,DKK3,TNFRSF11A,PAQR8,CHRDL1,TRAF4,HEYL,MMP19,EDA
7	regulation of transcription dna-templated	16	152	1738	37681	0.00182229	0.00820032	PKNOX2,KLHL31,PPARA,MLXIPL,NFATC2,ARNT2,HLF,MED12L,RUNX2,IRF4,HDAC9,SSBP2,MLLT3,OSR1,HEYL,INSR
9	phosphorylation	7	152	689	37681	0.0221585	0.0383512	PLK2,SGMS1,STK31,MARK1,PGM2L1,PKN3,INSR
11	neuron projection development	3	152	76	37681	0.00364736	0.0117236	CHL1,PTPRM,MYH10
12	transport	12	152	1620	37681	0.0315008	0.0429557	RAB39B,SLC1A2,ABCC5,SLC38A4,CYGB,SLC25A42,STEAP4,XK,SEC14L4,KCNF1,RAB34,CHRNA1
15	positive regulation of transcription dna-templated	6	152	510	37681	0.0177128	0.031883	PPARA,MLXIPL,NFATC2,ARNT2,RUNX2,IRF4
17	transmembrane transport	5	152	444	37681	0.0345126	0.0443734	SLC1A2,ABCC5,SLC38A4,SLC25A42,KCNF1
18	positive regulation of gtpase activity	3	152	175	37681	0.0341751	0.0452318	ARHGAP6,RGS3,RGS4
19	cell differentiation	9	152	570	37681	0.000539899	0.00404924	CHL1,DZIP1,EFNB1,NPNT,PAQR8,CHRDL1,OSR1,MMP19,EDA
20	nervous system development	6	152	279	37681	0.000982125	0.00631366	CHL1,SLC1A2,EFNB1,CHRDL1,HDAC9,CCDC88A
21	positive regulation of transcription from rna polymerase ii promoter	10	152	643	37681	0.000299891	0.00269902	PPARA,MLXIPL,NFATC2,ARNT2,RUNX2,S1PR1,AHI1,IRF4,OSR1,HEYL
23	proteolysis	6	152	559	37681	0.0262999	0.0408101	ADAMTS1,ENPEP,PM20D1,ADAM19,2010111I01RIK,MMP19
24	positive regulation of cell proliferation	6	152	348	37681	0.00298312	0.0103262	MLXIPL,ARNT2,RUNX2,S1PR1,ACER2,INSR
25	negative regulation of transcription from rna polymerase ii promoter	6	152	490	37681	0.0148442	0.0278329	PPARA,BCL6B,MLXIPL,HOXD8,HDAC9,OSR1
26	lipid metabolic process	8	152	227	37681	4.26865e-06	6.40298e-05	SGMS1,FAR1,PPARA,ACER2,LIPG,HPGD,PLCH1,SERINC5
27	cell-matrix adhesion	3	152	53	37681	0.00130035	0.00650177	NPNT,BCAM,EDA
28	cell proliferation	3	152	160	37681	0.0272269	0.0382879	ENPEP,MYH10,LIPG
29	positive regulation of gene expression	3	152	156	37681	0.0255159	0.0425265	SGMS1,NFATC2,OSR1
30	heart development	3	152	157	37681	0.025938	0.0416861	ADAM19,HDAC9,OSR1
32	negative regulation of transcription dna-templated	5	152	413	37681	0.0264428	0.0396642	MLXIPL,DKK3,RUNX2,HDAC9,HEYL
33	cell adhesion	13	152	450	37681	4.12357e-08	1.85561e-06	CHL1,PODXL,CD164,NPNT,MPDZ,PTPRM,CD93,BCAM,CADM3,FAT4,NLGN2,PGM5,LAMA4
34	inflammatory response	3	152	179	37681	0.0361688	0.0452109	SGMS1,HDAC9,CCL22
35	angiogenesis	3	152	159	37681	0.0267935	0.0388939	ENPEP,S1PR1,MMP19
37	endocytosis	4	152	130	37681	0.00194987	0.00797674	ITSN1,CAV2,LRP11,RAB34
38	axon guidance	3	152	100	37681	0.00782084	0.0195521	CHL1,EFNB1,MYH10
39	neuron migration	3	152	90	37681	0.00585046	0.0175514	CHL1,MARK1,MYH10
40	small gtpase mediated signal transduction	4	152	191	37681	0.00763861	0.0202198	RAB39B,ITSN1,RAB34,MRAS
41	intracellular signal transduction	5	152	237	37681	0.00282317	0.0105869	ITSN1,PLEKHM3,PREX2,ADCY3,PLCH1
42	dna replication	3	152	115	37681	0.0114313	0.0257205	DTL,REV3L,CCDC88A
43	glucose metabolic process	3	152	53	37681	0.00130035	0.00650177	PPARA,PGM2L1,PGM5
44	homophilic cell adhesion	4	152	68	37681	0.000169563	0.00190759	CHL1,PTPRM,CADM3,FAT4
KEGGPathways
Id	Items	Support	List size	Reference Support	Reference size	pValue	FDR	Genes
0	Cell adhesion molecules (CAMs)	3	152	143	37681	0.0203698	0.0271597	NLGN2,PTPRM,CADM3
1	Tight junction	3	152	132	37681	0.0165107	0.026417	MYH10,MRAS,MPDZ
2	Glutamatergic synapse	3	152	123	37681	0.0136889	0.0365036	SLC1A2,ADCY3,SHANK2
3	MAPK signaling pathway	4	152	263	37681	0.0222186	0.0253927	FGF12,MRAS,NFATC2,FGF13
6	Regulation of actin cytoskeleton	4	152	212	37681	0.0109034	0.0436138	MYH10,FGF12,MRAS,FGF13
7	Axon guidance	3	152	130	37681	0.0158576	0.0317152	RGS3,EFNB1,NFATC2
PantherPathways
Id	Items	Support	List size	Reference Support	Reference size	pValue	FDR	Genes
0	inflammation mediated by chemokine and cytokine signaling pathway	3	152	197	37681	0.0458611	0.0458611	CCL22,MYH10,MRAS
1	alzheimer disease-presenilin pathway	3	152	102	37681	0.0082562	0.0165124	APH1C,MMP19,TRIM2

## Sheet: ST6
Supplementary Table 6. FRPs.
FRPs Week 6
miRNAs	Targets	FDR	Silhouette	Terms
mmu-mir-17,mmu-mir-421,mmu-mir-23b,mmu-mir-429,mmu-mir-182,mmu-mir-92a,mmu-mir-200b,mmu-mir-141,mmu-mir-20a,mmu-mir-31,mmu-mir-200a,mmu-mir-96,mmu-mir-92b,mmu-mir-200c,mmu-mir-672,mmu-mir-375,mmu-mir-301b,mmu-mir-148a,mmu-mir-27b,mmu-mir-146b,mmu-mir-704,mmu-mir-19a,mmu-mir-7a,mmu-mir-130b,mmu-mir-18b,mmu-mir-183,mmu-mir-18a,mmu-mir-215,mmu-mir-325,mmu-mir-199b,mmu-mir-592,mmu-mir-22,mmu-mir-130a…	PCSK5,C1RA,CCBE1,CELSR1,BMP1,NPNT,NRG4,CD93,FBN1,DLK1,ADGRE5,FAT4,WIF1,CRELD1,LAMA4,COMP,ADGRL4,TLL1,STAB1,ADAM19,TGFA	3.40241e-09	0.782873	ipr006210:epidermal growth factor-like,ipr001881:egf-like calcium-binding,ipr000742:epidermal growth factor-like, type 3
mmu-mir-325,mmu-mir-137,mmu-mir-148a,mmu-mir-17,mmu-mir-130b,mmu-mir-20a,mmu-mir-183,mmu-mir-96,mmu-mir-19a,mmu-mir-199b,mmu-mir-130a,mmu-mir-497,mmu-mir-34c,mmu-mir-146b,mmu-mir-702,mmu-mir-298,mmu-mir-674,mmu-mir-700,mmu-mir-484,mmu-mir-27b,mmu-mir-7a,mmu-mir-31,mmu-mir-541,mmu-mir-329,mmu-mir-592,mmu-mir-708,mmu-mir-466g,mmu-mir-421,mmu-mir-23b,mmu-mir-429,mmu-mir-182,mmu-mir-200b,mmu-mir-669b…	IL1B,PPARG,HC,PRKCZ,AGTR1A,HDAC7,CALCA,CXCL15,IL34,CXCL1,PYCARD,HDAC9,PIK3CG,LY86,PDGFRA,S100A8,CMTM7,PDGFRB,AMOT	4.13639e-07	0.000286599	go:0006954:inflammatory response (bp),go:0006935:chemotaxis (bp)
mmu-mir-325,mmu-mir-130b,mmu-mir-301b,mmu-mir-421,mmu-mir-429,mmu-mir-182,mmu-mir-200b,mmu-mir-141,mmu-mir-484,mmu-mir-31,mmu-mir-200a,mmu-mir-297a,mmu-mir-183,mmu-mir-96,mmu-mir-27b,mmu-mir-146b,mmu-mir-23b,mmu-mir-704,mmu-mir-19a,mmu-mir-375,mmu-mir-7a,mmu-mir-148a,mmu-mir-18a,mmu-mir-200c,mmu-mir-92a,mmu-mir-1983,mmu-mir-92b,mmu-mir-199b,mmu-mir-100,mmu-mir-201,mmu-mir-1968,mmu-mir-17,mmu-mir-…	EPHA2,ANGPT2,JAM3,TNFAIP2,CCBE1,ENPEP,FGF1,CYP1B1,PGF,EFNB2,S1PR1,TGFA,HTATIP2,RAMP2,MMP19	7.35866e-07	0.740125	go:0001525:angiogenesis (bp)
mmu-mir-877,mmu-mir-421,mmu-mir-182,mmu-mir-92a,mmu-mir-200b,mmu-mir-141,mmu-mir-31,mmu-mir-27b,mmu-mir-146b,mmu-mir-200a,mmu-mir-1968,mmu-mir-96,mmu-mir-92b,mmu-mir-200c,mmu-mir-19a,mmu-mir-298,mmu-mir-148a,mmu-mir-199b,mmu-mir-100,mmu-mir-17,mmu-mir-23b,mmu-mir-669b,mmu-mir-187,mmu-mir-20a,mmu-mir-297a,mmu-mir-375,mmu-mir-376c,mmu-mir-488,mmu-mir-541,mmu-mir-130b,mmu-mir-429,mmu-mir-183,mmu-mir…	MYLK,PDGFRA,PDGFRB,PGF,CAV2,COL4A5,HRAS,LAMA4,COMP,SHC2,COL6A6,FLNB,PIK3CG,PIK3R3,PPARG,FGF1,SPI1,FGF13,EGLN1,TRAF4,RXRG,TGFA,EGLN3,ITGAE,ARHGEF6,PFN2,MYH10,PIP5K1B	2.74601e-06	0.35193	kegg:04510:focal adhesion,kegg:05200:pathways in cancer,kegg:04810:regulation of actin cytoskeleton
mmu-mir-325,mmu-mir-199b,mmu-mir-592,mmu-mir-135b,mmu-mir-322,mmu-mir-382,mmu-mir-376c,mmu-mir-22,mmu-mir-541,mmu-mir-504,mmu-mir-134,mmu-mir-377,mmu-mir-879,mmu-mir-341,mmu-mir-196a,mmu-mir-10b,mmu-mir-411,mmu-mir-211,mmu-mir-329,mmu-mir-486,mmu-mir-708,mmu-mir-410,mmu-mir-370,mmu-mir-34c,mmu-mir-488,mmu-mir-196b,mmu-mir-130b,mmu-mir-31,mmu-mir-27b,mmu-mir-1983,mmu-mir-183,mmu-mir-148a,mmu-mir-9…	CHL1,PHYHIP,COL14A1,SPEG,FNDC4,EPHA2,MYLK,PTPRM,DSCAM,EBI3,BZRAP1,NFASC,IGSF9,MYOM3,ATF7IP2	3.97046e-06	0.680169	ipr003961:fibronectin, type iii
mmu-mir-201,mmu-mir-421,mmu-mir-130b,mmu-mir-429,mmu-mir-182,mmu-mir-2137,mmu-mir-92a,mmu-mir-700,mmu-mir-200b,mmu-mir-141,mmu-mir-484,mmu-mir-146b,mmu-mir-200a,mmu-mir-1983,mmu-mir-704,mmu-mir-183,mmu-mir-96,mmu-mir-92b,mmu-mir-200c,mmu-mir-19a,mmu-mir-672,mmu-mir-7a,mmu-mir-301b,mmu-mir-148a,mmu-mir-10b,mmu-mir-325,mmu-mir-135b,mmu-mir-137,mmu-mir-130a,mmu-mir-497,mmu-mir-708,mmu-mir-455,mmu-mi…	SLC12A5,ENSMUSG00000021020,SLC1A2,ABCB1B,SNCA,SRD5A1,ATP1A1,PTPRM,NFATC2,APOBEC1,EMX2,DNAH8,ABCC5,ABCA8A,ABCA4,ABCG4,ABCB4,ABCA8B	4.21391e-06	0.124968	go:0042493:response to drug (bp),ipr003593:atpase, aaa+ type, core
mmu-mir-325,mmu-mir-199b,mmu-mir-592,mmu-mir-135b,mmu-mir-322,mmu-mir-382,mmu-mir-376c,mmu-mir-22,mmu-mir-541,mmu-mir-504,mmu-mir-134,mmu-mir-377,mmu-mir-879,mmu-mir-341,mmu-mir-196a,mmu-mir-10b,mmu-mir-411,mmu-mir-211,mmu-mir-329,mmu-mir-486,mmu-mir-708,mmu-mir-410,mmu-mir-370,mmu-mir-34c,mmu-mir-488,mmu-mir-196b,mmu-mir-497,mmu-mir-543,mmu-mir-455,mmu-mir-429,mmu-mir-92a,mmu-mir-200b,mmu-mir-66…	CHL1,ETV1,SEMA3A,CDK5R1,EFNB1,MYH10,GAS1,NFASC,CDH4,DCX,CELSR1,MARK1,CCK,GJA1	7.83716e-06	0.231566	go:0007411:axon guidance (bp),go:0001764:neuron migration (bp)
mmu-mir-92a,mmu-mir-669b,mmu-mir-31,mmu-mir-92b,mmu-mir-379,mmu-mir-410,mmu-mir-665,mmu-mir-211,mmu-mir-376c,mmu-mir-488,mmu-mir-484,mmu-mir-672,mmu-mir-200b,mmu-mir-141,mmu-mir-200a,mmu-mir-1968,mmu-mir-183,mmu-mir-19a,mmu-mir-877,mmu-mir-201,mmu-mir-421,mmu-mir-130b,mmu-mir-429,mmu-mir-182,mmu-mir-2137,mmu-mir-700,mmu-mir-146b,mmu-mir-1983,mmu-mir-704,mmu-mir-96,mmu-mir-200c,mmu-mir-7a,mmu-mir-…	COL14A1,ATP1A1,KCNE3,COL4A5,SLC8A2,CPA3,COL15A1,COL6A6,SLC12A5,SLC38A4,SLC9A6,SCN3B,SLC5A8,SLC22A5	2.30668e-05	0.163619	kegg:04974:protein digestion and absorption,go:0006814:sodium ion transport (bp)
mmu-mir-137,mmu-mir-877,mmu-mir-298,mmu-mir-421,mmu-mir-182,mmu-mir-92a,mmu-mir-200b,mmu-mir-141,mmu-mir-31,mmu-mir-27b,mmu-mir-146b,mmu-mir-200a,mmu-mir-1968,mmu-mir-96,mmu-mir-92b,mmu-mir-200c,mmu-mir-19a,mmu-mir-130b,mmu-mir-148a,mmu-mir-23b,mmu-mir-674,mmu-mir-429,mmu-mir-183,mmu-mir-375,mmu-mir-592,mmu-mir-134,mmu-mir-381,mmu-mir-379,mmu-mir-329,mmu-mir-410,mmu-mir-34c,mmu-mir-488,mmu-mir-18…	P2RX2,MYLK,NOS1,PDGFRA,AGTR1A,PTGER3,PDGFRB,CACNA1B,ADRB3,SLC8A2,ADCY3,CACNA1A,IL1B,JPH2,CALCA,CXCL1	4.26632e-05	0.20025	kegg:04020:calcium signaling pathway,go:0007204:elevation of cytosolic calcium ion concentration (bp)
mmu-mir-325,mmu-mir-137,mmu-mir-674,mmu-mir-31,mmu-mir-146b,mmu-mir-298,mmu-mir-17,mmu-mir-130b,mmu-mir-429,mmu-mir-92a,mmu-mir-200b,mmu-mir-669b,mmu-mir-141,mmu-mir-484,mmu-mir-20a,mmu-mir-200a,mmu-mir-1983,mmu-mir-183,mmu-mir-92b,mmu-mir-200c,mmu-mir-19a,mmu-mir-375,mmu-mir-7a,mmu-mir-301b,mmu-mir-148a,mmu-mir-592,mmu-mir-135b,mmu-mir-322,mmu-mir-541,mmu-mir-196a,mmu-mir-410,mmu-mir-1224,mmu-mi…	IL1B,ID2,PDE2A,NFATC2,IL7R,CITED2,HRAS,HINFP,GJA1,OSR1,RAMP2,PCSK5,AGTR1A,SEMA3C,ADAM19,FBN1,HDAC9	8.78239e-05	0.367389	go:0010628:positive regulation of gene expression (bp),go:0007507:heart development (bp)
mmu-mir-325,mmu-mir-137,mmu-mir-421,mmu-mir-182,mmu-mir-92a,mmu-mir-200b,mmu-mir-141,mmu-mir-31,mmu-mir-27b,mmu-mir-146b,mmu-mir-200a,mmu-mir-1968,mmu-mir-96,mmu-mir-92b,mmu-mir-200c,mmu-mir-19a,mmu-mir-1199,mmu-mir-183,mmu-mir-18a,mmu-mir-148a,mmu-mir-298,mmu-mir-23b,mmu-mir-669b,mmu-mir-20a,mmu-mir-17,mmu-mir-130b,mmu-mir-674,mmu-mir-429,mmu-mir-484,mmu-mir-1983,mmu-mir-375,mmu-mir-7a,mmu-mir-3…	IL1B,PDGFRA,RPS6KA1,FGF1,PDGFRB,PLA2G2D,NFATC2,CACNA1B,FGF13,HRAS,PLA2G4E,DUSP9,FLNB,CACNA1A,CDK5R1,IL34,FAM129A,TGFA,RGCC	0.000120123	0.0586923	kegg:04010:mapk signaling pathway,go:0001934:positive regulation of protein amino acid phosphorylation (bp)
mmu-mir-421,mmu-mir-429,mmu-mir-182,mmu-mir-200b,mmu-mir-141,mmu-mir-484,mmu-mir-31,mmu-mir-200a,mmu-mir-297a,mmu-mir-183,mmu-mir-96,mmu-mir-148a,mmu-mir-17,mmu-mir-23b,mmu-mir-130b,mmu-mir-92a,mmu-mir-20a,mmu-mir-92b,mmu-mir-7a,mmu-mir-135b,mmu-mir-211,mmu-mir-455,mmu-mir-488,mmu-mir-27b,mmu-mir-702,mmu-mir-704,mmu-mir-19a,mmu-mir-22,mmu-mir-497,mmu-mir-146b,mmu-mir-18b,mmu-mir-1983,mmu-mir-1968…	JAM3,MPZ,PTPRM,MPZL1,CADM3,CD22,H2-DMB2,H2-T9,NFASC,NLGN2,CDH4	0.00013359	0.827233	kegg:04514:cell adhesion molecules (cams)
mmu-mir-421,mmu-mir-148a,mmu-mir-23b,mmu-mir-31,mmu-mir-27b,mmu-mir-702,mmu-mir-1983,mmu-mir-183,mmu-mir-298,mmu-mir-325,mmu-mir-137,mmu-mir-708,mmu-mir-17,mmu-mir-669b,mmu-mir-187,mmu-mir-20a,mmu-mir-200a,mmu-mir-297a,mmu-mir-375,mmu-mir-877,mmu-mir-429,mmu-mir-200b,mmu-mir-484,mmu-mir-146b,mmu-mir-96,mmu-mir-200c,mmu-mir-19a,mmu-mir-92a,mmu-mir-704,mmu-mir-18a,mmu-mir-541,mmu-mir-130b,mmu-mir-6…	ENSMUSG00000054580,SYP,APLP1,CAV2,LRP11,DNM3,HRAS,RAB34,PIK3CG,PDGFRA,PRKCZ,ADRB3,PSD2,ARFGAP3,H2-T9,PIP5K1B	0.000590906	0.117635	go:0006897:endocytosis (bp),kegg:04144:endocytosis
mmu-mir-325,mmu-mir-137,mmu-mir-135b,mmu-mir-322,mmu-mir-376c,mmu-mir-22,mmu-mir-377,mmu-mir-543,mmu-mir-211,mmu-mir-668,mmu-mir-421,mmu-mir-182,mmu-mir-92a,mmu-mir-200b,mmu-mir-141,mmu-mir-31,mmu-mir-27b,mmu-mir-146b,mmu-mir-200a,mmu-mir-1968,mmu-mir-96,mmu-mir-92b,mmu-mir-200c,mmu-mir-19a,mmu-mir-708,mmu-mir-455,mmu-mir-370,mmu-mir-298,mmu-mir-148a,mmu-mir-674,mmu-mir-700,mmu-mir-484,mmu-mir-7a…	IL1B,CX3CR1,PDGFRA,GDF5,PDGFRB,CXCL15,CXCL1,TNFRSF9,TNFSF13B,TNFRSF11A,IL7R,TNFSF11,TNFSF8,SBSPON,BMP6,VPREB1	0.000632352	0.424075	kegg:04060:cytokine-cytokine receptor interaction,go:0006955:immune response (bp)
mmu-mir-877,mmu-mir-17,mmu-mir-674,mmu-mir-182,mmu-mir-141,mmu-mir-31,mmu-mir-200a,mmu-mir-1968,mmu-mir-704,mmu-mir-183,mmu-mir-96,mmu-mir-19a,mmu-mir-375,mmu-mir-7a,mmu-mir-148a,mmu-mir-421,mmu-mir-92a,mmu-mir-200b,mmu-mir-27b,mmu-mir-146b,mmu-mir-92b,mmu-mir-200c,mmu-mir-18a,mmu-mir-23b,mmu-mir-429,mmu-mir-298,mmu-mir-130b,mmu-mir-484,mmu-mir-20a,mmu-mir-18b,mmu-mir-1983,mmu-mir-301b,mmu-mir-54…	MYLK,PODXL,PDGFRA,FGF1,SNAI2,PDGFRB,S1PR1,VIL1,JAM3,ENPEP,PRKCZ,ATN1	0.00120106	0.331873	go:0030335:positive regulation of cell migration (bp),go:0016477:cell migration (bp)
mmu-mir-23b,mmu-mir-182,mmu-mir-92a,mmu-mir-27b,mmu-mir-146b,mmu-mir-1983,mmu-mir-183,mmu-mir-92b,mmu-mir-19a,mmu-mir-7a,mmu-mir-148a,mmu-mir-31,mmu-mir-877,mmu-mir-429,mmu-mir-200b,mmu-mir-96,mmu-mir-200c,mmu-mir-484,mmu-mir-135b,mmu-mir-504,mmu-mir-149,mmu-mir-10b,mmu-mir-329,mmu-mir-17,mmu-mir-20a,mmu-mir-541,mmu-mir-130b,mmu-mir-674,mmu-mir-141,mmu-mir-200a,mmu-mir-325,mmu-mir-1940,mmu-mir-70…	RAB39B,RAB3A,ARL4D,RAB36,RAB3D,RHOV,HRAS,RAB34,RAB15,ARHGAP31,RASGEF1B	0.00247084	0.818274	ipr005225:small gtp-binding protein domain,ipr001806:ras gtpase,ipr003579:ras small gtpase, rab type,ipr020849:ras small gtpase,ipr003578:small gtpase, rho type,go:0007264:small gtpase mediated signal transduction (bp)
mmu-mir-17,mmu-mir-421,mmu-mir-20a,mmu-mir-7a,mmu-mir-298,mmu-mir-148a,mmu-mir-135b,mmu-mir-322,mmu-mir-376c,mmu-mir-22,mmu-mir-377,mmu-mir-543,mmu-mir-211,mmu-mir-668,mmu-mir-199b,mmu-mir-130a,mmu-mir-497,mmu-mir-34c,mmu-mir-674,mmu-mir-700,mmu-mir-484,mmu-mir-27b,mmu-mir-146b,mmu-mir-541,mmu-mir-329,mmu-mir-702,mmu-mir-23b,mmu-mir-92a,mmu-mir-18b,mmu-mir-92b,mmu-mir-18a,mmu-mir-411,mmu-mir-376b…	PREX1,CX3CR1,PRKCZ,CXCL15,CXCL1,HRAS,SHC2,ADCY3,PIK3CG,PIK3R3,EIF4EBP1,PPARGC1A,HK2	0.00378847	0.361533	kegg:04062:chemokine signaling pathway,kegg:04910:insulin signaling pathway
FRPs Week 8
miRNAs	Targets	FDR	Silhouette	Terms
mmu-mir-877,mmu-mir-218,mmu-mir-143,mmu-mir-199b,mmu-mir-325,mmu-mir-1943,mmu-mir-130a,mmu-mir-488,mmu-mir-214,mmu-mir-22,mmu-mir-211,mmu-mir-708,mmu-mir-467a,mmu-mir-182,mmu-mir-92b,mmu-mir-181a,mmu-mir-146b,mmu-mir-27b,mmu-mir-421,mmu-mir-200a,mmu-mir-96,mmu-mir-141,mmu-mir-200c,mmu-mir-19a,mmu-mir-200b,mmu-mir-31,mmu-mir-148b,mmu-mir-148a,mmu-mir-183,mmu-mir-18a,mmu-mir-300,mmu-mir-29b,mmu-mir…	MYLK,ARHGEF6,PDGFRA,FGF1,TIAM2,PFN2,PDGFRB,ITGB3,EZR,MYH10,FGF13,FGF12,PFN4,RRAS,MRAS,ITGB6,PIP5K1B,PPP1CB,PIK3R3,PODXL,SNAI2,CTSH,S1PR1,VIL1,DRD1,CAV2,COL4A5,LAMA4,SHC2,CAPN2,COL6A6,FLNB,IL1B,DUSP8,PLA2G2D,MAPK13,CACNA1H,PTPRR,NR4A1,CACNA1A,PPARG,FZD9,ARNT2,EGLN1,TCF7L1,TRAF4,RXRG,TGFA,EGLN3,WNT9A,JAM3,ENPEP,CD44,ATN1,PTK7	8.65528e-11	0.201233	kegg:04810:regulation of actin cytoskeleton,go:0030335:positive regulation of cell migration (bp),kegg:04510:focal adhesion,kegg:04010:mapk signaling pathway,kegg:05200:pathways in cancer,go:0016477:cell migration (bp)
mmu-mir-182,mmu-mir-92b,mmu-mir-181a,mmu-mir-421,mmu-mir-429,mmu-mir-301b,mmu-mir-200a,mmu-mir-23b,mmu-mir-96,mmu-mir-141,mmu-mir-200c,mmu-mir-148a,mmu-mir-17,mmu-mir-672,mmu-mir-375,mmu-mir-200b,mmu-mir-31,mmu-mir-146b,mmu-mir-27b,mmu-mir-148b,mmu-mir-7a,mmu-mir-19a,mmu-mir-704,mmu-mir-547,mmu-mir-18b,mmu-mir-183,mmu-mir-18a,mmu-mir-130b,mmu-mir-143,mmu-mir-486,mmu-mir-215,mmu-mir-199b,mmu-mir-3…	PCSK5,MASP2,C1RA,CCBE1,TENM4,CELSR1,BMP1,NPNT,NRXN2,NRG4,CD93,DLK1,ADGRE5,TENM1,FAT4,WIF1,LAMA4,ADGRL4,TLL1,STAB1,ADAM11,IMPG2,ADAM19,TGFA	1.28576e-09	0.647113	ipr006210:epidermal growth factor-like,ipr000742:epidermal growth factor-like, type 3,ipr001881:egf-like calcium-binding
mmu-mir-669b,mmu-mir-92b,mmu-mir-31,mmu-mir-665,mmu-mir-221,mmu-mir-449c,mmu-mir-103,mmu-mir-143,mmu-mir-150,mmu-mir-488,mmu-mir-877,mmu-mir-484,mmu-mir-672,mmu-mir-200a,mmu-mir-141,mmu-mir-200b,mmu-mir-370,mmu-mir-322,mmu-mir-455,mmu-mir-10b,mmu-mir-211,mmu-mir-329,mmu-mir-497,mmu-mir-708,mmu-mir-183,mmu-mir-19a,mmu-mir-10a,mmu-mir-504,mmu-mir-23b,mmu-mir-669d,mmu-mir-674,mmu-mir-27b,mmu-mir-421…	COL14A1,ATP1A1,COL4A5,FXYD2,SLC8A2,CPA3,COL15A1,KCNQ1,COL6A6,RAB3D,PLA2G2D,RYR2,CAR2,ADCY3,MYLK,EZR,SLC26A7,MYL6B,AGTR1A,ACTG2,NPR2,PPP1CB,RAMP2,ITIH4,VWA3A,CACHD1,AW551984,ITIH5,SLC12A5,KCNS1,KCNA3,KCNN2,KCNH1,ATP2C2,TRPM6,CACNA1H,CACNA1A,GJA4,SLC38A4,SCN3B,SLC5A8,CLIC1	2.38863e-09	0.137647	kegg:04974:protein digestion and absorption,kegg:04972:pancreatic secretion,kegg:04971:gastric acid secretion,kegg:04270:vascular smooth muscle contraction,ipr002035:von willebrand factor, type a,go:0006813:potassium ion transport (bp),go:0006816:calcium ion transport (bp),go:0071805:,go:0006814:sodium ion transport (bp),go:0034765:regulation of ion transmembrane transport (bp)
mmu-mir-218,mmu-mir-150,mmu-mir-137,mmu-mir-877,mmu-mir-298,mmu-mir-467a,mmu-mir-182,mmu-mir-92b,mmu-mir-181a,mmu-mir-146b,mmu-mir-27b,mmu-mir-421,mmu-mir-200a,mmu-mir-96,mmu-mir-141,mmu-mir-200c,mmu-mir-19a,mmu-mir-200b,mmu-mir-31,mmu-mir-148b,mmu-mir-148a,mmu-mir-130b,mmu-mir-674,mmu-mir-429,mmu-mir-23b,mmu-mir-183,mmu-mir-375,mmu-mir-484,mmu-mir-7a,mmu-mir-143,mmu-mir-504,mmu-mir-22,mmu-mir-22…	P2RX2,MYLK,NOS1,PDGFRA,AGTR1A,PTGER3,HRH1,P2RX3,P2RX1,PDGFRB,HTR7,PTGER1,HTR4,CYSLTR2,CACNA1H,ADRB3,RYR2,TBXA2R,SLC8A2,ADCY3,CACNA1A,HTR2A,DRD1,HCRTR1,LPAR2,S1PR1,GRIA3,GABRR2,LPAR3,TSPO	3.27062e-08	0.758023	kegg:04020:calcium signaling pathway,kegg:04080:neuroactive ligand-receptor interaction,ipr017452:gpcr, rhodopsin-like superfamily,go:0007186:g-protein coupled receptor protein signaling pathway (bp),ipr000276:gpcr, rhodopsin-like, 7tm
mmu-mir-29b,mmu-mir-325,mmu-mir-1943,mmu-mir-29c,mmu-mir-301b,mmu-mir-130b,mmu-mir-182,mmu-mir-484,mmu-mir-421,mmu-mir-429,mmu-mir-200a,mmu-mir-297a,mmu-mir-96,mmu-mir-141,mmu-mir-183,mmu-mir-200b,mmu-mir-31,mmu-mir-146b,mmu-mir-27b,mmu-mir-181a,mmu-mir-148b,mmu-mir-23b,mmu-mir-7a,mmu-mir-148a,mmu-mir-19a,mmu-mir-375,mmu-mir-704,mmu-mir-486,mmu-mir-215,mmu-mir-137,mmu-mir-467a,mmu-mir-200c,mmu-mi…	EPHA2,ANGPT2,JAM3,TNFAIP2,CCBE1,COL8A2,ENPEP,FGF1,CYP1B1,EFNB2,S1PR1,ARHGAP24,TGFA,RAMP2,MMP19,MEIS1	2.27787e-06	0.697683	go:0001525:angiogenesis (bp)
mmu-mir-150,mmu-mir-148a,mmu-mir-133b,mmu-mir-218,mmu-mir-143,mmu-mir-1943,mmu-mir-133a,mmu-mir-214,mmu-mir-22,mmu-mir-879,mmu-mir-7a,mmu-mir-146b,mmu-mir-27b,mmu-mir-375,mmu-mir-421,mmu-mir-183,mmu-mir-669b,mmu-mir-181a,mmu-mir-669d,mmu-mir-200a,mmu-mir-23b,mmu-mir-141,mmu-mir-19a,mmu-mir-130b,mmu-mir-182,mmu-mir-148b,mmu-mir-18b,mmu-mir-96,mmu-mir-18a,mmu-mir-467a,mmu-mir-674,mmu-mir-20b,mmu-mi…	SLC27A4,ACSL1,FAAH,ACADL,ECH1,ECHS1,HPGD,ACSM5,ACAA2,SNCA,PPARA,PPARG,ME1,RXRG	6.89399e-06	0.651139	go:0006631:fatty acid metabolic process (bp),kegg:03320:ppar signaling pathway
mmu-mir-325,mmu-mir-137,mmu-mir-322,mmu-mir-22,mmu-mir-211,mmu-mir-221,mmu-mir-377,mmu-mir-92b,mmu-mir-20b,mmu-mir-484,mmu-mir-27b,mmu-mir-23b,mmu-mir-7a,mmu-mir-17,mmu-mir-31,mmu-mir-467a,mmu-mir-182,mmu-mir-181a,mmu-mir-146b,mmu-mir-421,mmu-mir-200a,mmu-mir-96,mmu-mir-141,mmu-mir-200c,mmu-mir-19a,mmu-mir-200b,mmu-mir-10a,mmu-mir-143,mmu-mir-214,mmu-mir-29c,mmu-mir-103,mmu-mir-150,mmu-mir-370,mm…	IL1B,CX3CR1,IL6RA,PDGFRA,IL1RAP,CD40,GDF5,PDGFRB,CXCL15,CXCL1,TNFRSF9,TNFRSF11A,IL7R,OSM,CCR3,CXCR3,CCL22,XCL1,AMH,HC,S100A8,CMTM7,ELMO1,TIAM2,SHC2,ADCY3,PIK3R3,SBSPON,BMP6	9.59002e-06	0.443175	kegg:04060:cytokine-cytokine receptor interaction,kegg:04062:chemokine signaling pathway,go:0006935:chemotaxis (bp),go:0006955:immune response (bp)
mmu-mir-10a,mmu-mir-29b,mmu-mir-196b,mmu-mir-218,mmu-mir-486,mmu-mir-199b,mmu-mir-325,mmu-mir-370,mmu-mir-322,mmu-mir-196a,mmu-mir-488,mmu-mir-504,mmu-mir-214,mmu-mir-449a,mmu-mir-411,mmu-mir-592,mmu-mir-10b,mmu-mir-22,mmu-mir-29c,mmu-mir-211,mmu-mir-134,mmu-mir-377,mmu-mir-329,mmu-mir-341,mmu-mir-879,mmu-mir-708,mmu-mir-136,mmu-mir-143,mmu-mir-130a,mmu-mir-221,mmu-mir-182,mmu-mir-148b,mmu-mir-30…	CHL1,DSG2,CELSR1,CLSTN3,PTPRM,PCDH12,L1CAM,CADM3,FAT4,PCDH20,PCDH7	3.2156e-05	0.750802	go:0007156:homophilic cell adhesion (bp),ipr002126:cadherin
mmu-mir-10a,mmu-mir-29b,mmu-mir-196b,mmu-mir-218,mmu-mir-486,mmu-mir-199b,mmu-mir-325,mmu-mir-370,mmu-mir-322,mmu-mir-196a,mmu-mir-488,mmu-mir-504,mmu-mir-214,mmu-mir-449a,mmu-mir-411,mmu-mir-592,mmu-mir-10b,mmu-mir-22,mmu-mir-29c,mmu-mir-211,mmu-mir-134,mmu-mir-377,mmu-mir-329,mmu-mir-341,mmu-mir-879,mmu-mir-708,mmu-mir-146b,mmu-mir-148b,mmu-mir-148a,mmu-mir-672,mmu-mir-877,mmu-mir-92b,mmu-mir-2…	CHL1,SPEG,MYLK,IL6RA,PTPRU,PTPRM,DSCAM,L1CAM,IGSF9,MYOM3,PHYHIP,COL14A1,FNDC4,EPHA2,EBI3	5.02004e-05	0.818767	ipr003961:fibronectin, type iii
mmu-mir-182,mmu-mir-484,mmu-mir-421,mmu-mir-429,mmu-mir-200a,mmu-mir-297a,mmu-mir-96,mmu-mir-141,mmu-mir-183,mmu-mir-200b,mmu-mir-31,mmu-mir-29b,mmu-mir-218,mmu-mir-325,mmu-mir-1943,mmu-mir-150,mmu-mir-214,mmu-mir-592,mmu-mir-29c,mmu-mir-221,mmu-mir-148b,mmu-mir-148a,mmu-mir-92b,mmu-mir-20b,mmu-mir-23b,mmu-mir-7a,mmu-mir-17,mmu-mir-130b,mmu-mir-103,mmu-mir-143,mmu-mir-455,mmu-mir-488,mmu-mir-211,…	JAM3,F11R,MPZ,PTPRM,MPZL1,L1CAM,CADM3,CD22,CLDN6,CD40,NRXN2,CD86,NLGN2	5.44409e-05	0.778393	kegg:04514:cell adhesion molecules (cams)
mmu-mir-92b,mmu-mir-146b,mmu-mir-23b,mmu-mir-700,mmu-mir-17,mmu-mir-106a,mmu-mir-18a,mmu-mir-298,mmu-mir-467a,mmu-mir-20b,mmu-mir-421,mmu-mir-148b,mmu-mir-200a,mmu-mir-1983,mmu-mir-141,mmu-mir-200c,mmu-mir-375,mmu-mir-877,mmu-mir-31,mmu-mir-103,mmu-mir-300,mmu-mir-130a,mmu-mir-221,mmu-mir-7a,mmu-mir-183,mmu-mir-19a,mmu-mir-184,mmu-mir-669d,mmu-mir-218,mmu-mir-486,mmu-mir-10a,mmu-mir-143,mmu-mir-1…	CIB2,MYL6B,FSTL1,LCP1,FKBP14,CAPN11,SLC25A13,RYR2,EFCAB2,PLCH1,CAPN2,MYL1,EFHB,S100A8	0.000610512	0.676846	ipr018249:ef-hand 2,ipr002048:calcium-binding ef-hand
mmu-mir-674,mmu-mir-182,mmu-mir-20b,mmu-mir-146b,mmu-mir-148b,mmu-mir-200a,mmu-mir-18b,mmu-mir-141,mmu-mir-148a,mmu-mir-17,mmu-mir-183,mmu-mir-18a,mmu-mir-19a,mmu-mir-298,mmu-mir-877,mmu-mir-130b,mmu-mir-704,mmu-mir-31,mmu-mir-181a,mmu-mir-421,mmu-mir-96,mmu-mir-27b,mmu-mir-429,mmu-mir-7a,mmu-mir-200c,mmu-mir-200b,mmu-mir-1983,mmu-mir-375	ABCC5,ABCA8A,ABCA4,ABCC12,ABCB4,ABCA2,ABCA8B,DNAH8	0.000654285	0.856865	ipr003593:atpase, aaa+ type, core,kegg:02010:abc transporters
mmu-mir-103,mmu-mir-370,mmu-mir-455,mmu-mir-497,mmu-mir-182,mmu-mir-148b,mmu-mir-301b,mmu-mir-18b,mmu-mir-7a,mmu-mir-183,mmu-mir-18a,mmu-mir-130b,mmu-mir-293,mmu-mir-694,mmu-mir-421,mmu-mir-23b,mmu-mir-486,mmu-mir-211,mmu-mir-377,mmu-mir-96,mmu-mir-146b,mmu-mir-429,mmu-mir-17,mmu-mir-200b,mmu-mir-215,mmu-mir-325,mmu-mir-92b,mmu-mir-181a,mmu-mir-484,mmu-mir-200a,mmu-mir-141,mmu-mir-200c,mmu-mir-19…	HCRTR1,CELSR1,ADGRB2,PROKR2,ADGRE5,ADGRG3,ADGRL1,ADGRL4,FZD9,CD247,CALCA,L1CAM,CD22	0.00117703	0.72305	go:0007186:g-protein coupled receptor protein signaling pathway (bp),go:0007218:neuropeptide signaling pathway (bp),go:0007166:cell surface receptor linked signaling pathway (bp)
mmu-mir-146b,mmu-mir-23b,mmu-mir-1983,mmu-mir-7a,mmu-mir-199b,mmu-mir-130a,mmu-mir-488,mmu-mir-92b,mmu-mir-148b,mmu-mir-1948,mmu-mir-183,mmu-mir-466g,mmu-mir-877,mmu-mir-214,mmu-mir-674,mmu-mir-200c,mmu-mir-19a,mmu-mir-20b,mmu-mir-200a,mmu-mir-148a,mmu-mir-17,mmu-mir-130b,mmu-mir-18a,mmu-mir-484,mmu-mir-375,mmu-mir-31,mmu-mir-10a,mmu-mir-325,mmu-mir-322,mmu-mir-504,mmu-mir-10b,mmu-mir-134,mmu-mir…	DUSP27,DUSP8,PDP1,PTPN18,PTPRU,PTPRM,PHPT1,PTPRR,FBP2,PGP,DLGAP5,TNS2,PPP1CB	0.00246246	0.821979	go:0016311:dephosphorylation (bp),go:0006470:protein amino acid dephosphorylation (bp)
mmu-mir-674,mmu-mir-484,mmu-mir-429,mmu-mir-297a,mmu-mir-200c,mmu-mir-375,mmu-mir-200b,mmu-mir-146b,mmu-mir-27b,mmu-mir-183,mmu-mir-103,mmu-mir-10a,mmu-mir-504,mmu-mir-10b,mmu-mir-329,mmu-mir-182,mmu-mir-18b,mmu-mir-96,mmu-mir-18a,mmu-mir-31,mmu-mir-148b,mmu-mir-200a,mmu-mir-141,mmu-mir-148a,mmu-mir-19a,mmu-mir-130b,mmu-mir-92b,mmu-mir-421,mmu-mir-301b,mmu-mir-1948,mmu-mir-7a,mmu-mir-297c,mmu-mir…	RAB37,RAB36,RAB3D,RHOF,RRAS,RAB34,MRAS,RAB15,RHOV,ARL5C,ARHGAP31	0.0137058	0.869388	ipr005225:small gtp-binding protein domain,ipr001806:ras gtpase,ipr020849:ras small gtpase,ipr003579:ras small gtpase, rab type,ipr003578:small gtpase, rho type,ipr002041:ran gtpase,go:0007264:small gtpase mediated signal transduction (bp)
FRPs Week 10
miRNAs	Targets	FDR	Silhouette	Terms
mmu-mir-877,mmu-mir-211,mmu-mir-135b,mmu-mir-199b,mmu-mir-708,mmu-mir-143,mmu-mir-130a,mmu-mir-325,mmu-mir-488,mmu-mir-22,mmu-mir-669b,mmu-mir-103,mmu-mir-1968,mmu-mir-421,mmu-mir-182,mmu-mir-92a,mmu-mir-200c,mmu-mir-141,mmu-mir-301a,mmu-mir-27b,mmu-mir-31,mmu-mir-330,mmu-mir-467d,mmu-mir-200b,mmu-mir-467a,mmu-mir-181a,mmu-mir-92b,mmu-mir-146b,mmu-mir-19a,mmu-mir-96,mmu-mir-200a,mmu-mir-181c,mmu-…	MYLK,ARHGEF6,DIAP2,ITGB2,PDGFRA,FGF1,TIAM2,PFN2,ITGAM,PDGFRB,ITGB3,EZR,MYH10,FGF13,HRAS,PFN4,RRAS,MRAS,PIP5K1B,PPP1CB,BMPER,PRKCZ,NPNT,CD44,CYSLTR2,FBXW7,PLA2G5,PLA2G2D,NFATC2,MAPK13,CACNA1B,CACNA1H,PTPRR,PLA2G4E,DUSP9,FLNB,CACNA1A,JAM3,PODXL,ENPEP,SNAI2,NRG1,ATN1,PTK7,CAV2,COL4A5,BAD,LAMA4,SHC2,CAPN2,COL6A6,MIEN1,CTSH,S1PR1,PPARG,TCF7,FZD9,ARNT2,E2F2,EGLN1,TCF7L1,TRAF4,RXRG,EGLN3,CREB3L1,CTTN,MP…	2.82237e-18	0.016019	kegg:04810:regulation of actin cytoskeleton,go:0070374:positive regulation of erk1 and erk2 cascade (bp),kegg:04010:mapk signaling pathway,go:0016477:cell migration (bp),kegg:04510:focal adhesion,go:0030335:positive regulation of cell migration (bp),kegg:05200:pathways in cancer,kegg:05218:melanoma,kegg:05215:prostate cancer,kegg:04530:tight junction,go:0006184:gtp catabolic process (bp),kegg:046…
mmu-mir-708,mmu-mir-143,mmu-mir-130a,mmu-mir-150,mmu-mir-667,mmu-mir-5129,mmu-mir-664,mmu-mir-29c,mmu-mir-221,mmu-mir-103,mmu-mir-29b,mmu-mir-325,mmu-mir-429,mmu-mir-92a,mmu-mir-484,mmu-mir-200c,mmu-mir-20a,mmu-mir-200b,mmu-mir-704,mmu-mir-467a,mmu-mir-669b,mmu-mir-183,mmu-mir-181a,mmu-mir-33,mmu-mir-92b,mmu-mir-18a,mmu-mir-1953,mmu-mir-19a,mmu-mir-672,mmu-mir-7a,mmu-mir-1983,mmu-mir-181c,mmu-mir…	SRGAP3,SEMA4G,NGEF,EPHA2,SEMA3A,PLXNA1,EFNB1,PLXNB3,SEMA3C,DPYSL2,NFATC2,RGS3,L1CAM,HRAS,SEMA4F,EFNB2,ABLIM2,LRRC4C,SLIT3,PLXND1,ITGB2,ITGB3	9.98568e-12	0.57389	kegg:04360:axon guidance,ipr003659:plexin/semaphorin/integrin,ipr001627:semaphorin/cd100 antigen
mmu-mir-31,mmu-mir-421,mmu-mir-141,mmu-mir-200a,mmu-mir-182,mmu-mir-23b,mmu-mir-148a,mmu-mir-27b,mmu-mir-330,mmu-mir-704,mmu-mir-181a,mmu-mir-146b,mmu-mir-19a,mmu-mir-375,mmu-mir-148b,mmu-mir-7a,mmu-mir-181c,mmu-mir-547,mmu-mir-18b,mmu-mir-130b,mmu-mir-183,mmu-mir-18a,mmu-mir-301b,mmu-mir-22,mmu-mir-592,mmu-mir-211,mmu-mir-377,mmu-mir-199b,mmu-mir-143,mmu-mir-130a,mmu-mir-325,mmu-mir-215,mmu-mir-…	MASP2,C1RA,CCBE1,TENM4,CELSR1,BMP1,FRAS1,NPNT,EDIL3,LTBP2,NRG4,CD93,DLK1,ADGRE5,NRG1,FAT4,WIF1,CRELD1,LAMA4,ADGRL4,SLIT3,TLL1,STAB1,IMPG2,ADAM19	2.86979e-10	0.515005	ipr006210:epidermal growth factor-like,ipr001881:egf-like calcium-binding,ipr000742:epidermal growth factor-like, type 3
mmu-mir-10b,mmu-mir-135b,mmu-mir-103,mmu-mir-10a,mmu-mir-504,mmu-mir-221,mmu-mir-325,mmu-mir-22,mmu-mir-23b,mmu-mir-20a,mmu-mir-31,mmu-mir-669b,mmu-mir-669d,mmu-mir-877,mmu-mir-484,mmu-mir-702,mmu-mir-375,mmu-mir-672,mmu-mir-421,mmu-mir-674,mmu-mir-700,mmu-mir-92a,mmu-mir-27b,mmu-mir-18b,mmu-mir-330,mmu-mir-92b,mmu-mir-18a,mmu-mir-382,mmu-mir-211,mmu-mir-708,mmu-mir-143,mmu-mir-322,mmu-mir-150,mm…	RAB3D,PLA2G5,ATP1A1,PLA2G2D,RYR2,CAR2,FXYD2,PLA2G4E,CPA3,ADCY3,KCNQ1,COL14A1,COL4A5,SLC8A2,COL15A1,COL6A6,KCND3,CACNA1B,KCNC1,CACNA1H,CLCN6,KCNH1,CACNA1A,ATP2C2,ATP10A,SLC30A4,ATP13A4,ATP8A2,CHRNB1,AOC3,PEX5L,ABCB1B,KCNN2,ABCB4,KCNC2,CLIC4,HIC1,KLHL31,BCL6B,ABTB2,KCTD12B,KLHL34,KLHL12,BTBD11	8.10554e-10	0.0112317	kegg:04972:pancreatic secretion,kegg:04974:protein digestion and absorption,go:0034765:regulation of ion transmembrane transport (bp),go:0006812:cation transport (bp),kegg:04976:bile secretion,go:0006813:potassium ion transport (bp),go:0071805:,ipr000210:btb/poz-like
mmu-mir-877,mmu-mir-298,mmu-mir-1968,mmu-mir-421,mmu-mir-182,mmu-mir-92a,mmu-mir-200c,mmu-mir-141,mmu-mir-301a,mmu-mir-27b,mmu-mir-31,mmu-mir-330,mmu-mir-467d,mmu-mir-200b,mmu-mir-467a,mmu-mir-181a,mmu-mir-92b,mmu-mir-146b,mmu-mir-19a,mmu-mir-96,mmu-mir-200a,mmu-mir-181c,mmu-mir-148a,mmu-mir-130b,mmu-mir-148b,mmu-mir-674,mmu-mir-23b,mmu-mir-429,mmu-mir-183,mmu-mir-33,mmu-mir-375,mmu-mir-484,mmu-m…	MYLK,NOS1,PDGFRA,AGTR1A,PTGER3,HRH1,TACR1,PDGFRB,HTR7,PTGER1,HTR4,CACNA1B,CYSLTR2,CACNA1H,ADRB3,RYR2,SLC8A2,ADCY3,ERBB3,CACNA1A,HTR2A,LPAR2,S1PR1,P2RY2,CHRNB1,TSPO,CHRNA1	1.42837e-06	0.757074	kegg:04020:calcium signaling pathway,ipr017452:gpcr, rhodopsin-like superfamily,kegg:04080:neuroactive ligand-receptor interaction,ipr000276:gpcr, rhodopsin-like, 7tm,go:0007186:g-protein coupled receptor protein signaling pathway (bp)
mmu-mir-429,mmu-mir-92a,mmu-mir-148a,mmu-mir-200c,mmu-mir-200b,mmu-mir-92b,mmu-mir-148b,mmu-mir-96,mmu-mir-674,mmu-mir-17,mmu-mir-484,mmu-mir-141,mmu-mir-20a,mmu-mir-301a,mmu-mir-27b,mmu-mir-31,mmu-mir-130b,mmu-mir-467a,mmu-mir-183,mmu-mir-181a,mmu-mir-33,mmu-mir-18a,mmu-mir-19a,mmu-mir-672,mmu-mir-20b,mmu-mir-200a,mmu-mir-181c,mmu-mir-150,mmu-mir-7a,mmu-mir-146b,mmu-mir-375,mmu-mir-421,mmu-mir-2…	PLA2G15,PPARA,SLC27A4,ACSL1,ACADL,ECH1,ECHS1,HPGD,ACAA2,SNCA,PPARG,OLR1,ME1,RXRG	7.50599e-06	0.66026	go:0006631:fatty acid metabolic process (bp),kegg:03320:ppar signaling pathway
mmu-mir-877,mmu-mir-17,mmu-mir-467a,mmu-mir-20b,mmu-mir-148a,mmu-mir-301a,mmu-mir-130b,mmu-mir-146b,mmu-mir-148b,mmu-mir-221,mmu-mir-325,mmu-mir-504,mmu-mir-22,mmu-mir-429,mmu-mir-200c,mmu-mir-27b,mmu-mir-200b,mmu-mir-704,mmu-mir-23b,mmu-mir-20a,mmu-mir-31,mmu-mir-669b,mmu-mir-1191,mmu-mir-669c,mmu-mir-466g,mmu-mir-702,mmu-mir-298,mmu-mir-1983,mmu-mir-484,mmu-mir-375,mmu-mir-421,mmu-mir-674,mmu-m…	MYLK,MYL6B,AGTR1A,PLA2G5,ACTG2,PLA2G2D,RAMP1,NPR2,PLA2G4E,ADCY3,PPP1CB,RAMP2,NFATC2,MAPK13,HRAS,BAD,SHC2,GNAO1,NOS1,CACNA1A,LAMA4,TLR11,SHANK2	1.7182e-05	0.391997	kegg:04270:vascular smooth muscle contraction,kegg:04370:vegf signaling pathway,kegg:04730:long-term depression,kegg:05145:toxoplasmosis,kegg:04724:glutamatergic synapse
mmu-mir-182,mmu-mir-429,mmu-mir-17,mmu-mir-20a,mmu-mir-31,mmu-mir-200b,mmu-mir-20b,mmu-mir-301a,mmu-mir-467a,mmu-mir-19a,mmu-mir-23b,mmu-mir-181a,mmu-mir-181c,mmu-mir-92a,mmu-mir-130b,mmu-mir-191,mmu-mir-183,mmu-mir-33,mmu-mir-92b,mmu-mir-301b,mmu-mir-7a,mmu-mir-1983,mmu-mir-484,mmu-mir-148a,mmu-mir-298,mmu-mir-96,mmu-mir-200c,mmu-mir-704,mmu-mir-669b,mmu-mir-877,mmu-mir-467c,mmu-mir-199b,mmu-mir…	DCN,CPN2,SLITRK2,LRRC4C,FMOD,SLIT3,LUM,ASPN,FLRT3,RSU1,LGI2,LRRC1,LGI4,TLR11,ISLR2	2.66277e-05	0.629169	ipr003591:leucine-rich repeat, typical subtype,ipr000372:leucine-rich repeat-containing n-terminal,ipr000483:cysteine-rich flanking region, c-terminal domain
mmu-mir-592,mmu-mir-196b,mmu-mir-382,mmu-mir-10b,mmu-mir-29c,mmu-mir-211,mmu-mir-134,mmu-mir-541,mmu-mir-377,mmu-mir-135b,mmu-mir-341,mmu-mir-199b,mmu-mir-708,mmu-mir-196a,mmu-mir-10a,mmu-mir-29b,mmu-mir-325,mmu-mir-322,mmu-mir-488,mmu-mir-504,mmu-mir-22,mmu-mir-221,mmu-mir-143,mmu-mir-130a,mmu-mir-182,mmu-mir-18b,mmu-mir-130b,mmu-mir-183,mmu-mir-18a,mmu-mir-148b,mmu-mir-301b,mmu-mir-7a,mmu-mir-1…	CHL1,DSG2,CELSR1,CLSTN3,PTPRM,PCDH12,L1CAM,CADM3,FAT4,PCDH20,PCDHB21	3.44314e-05	0.75333	go:0007156:homophilic cell adhesion (bp),ipr002126:cadherin
mmu-mir-592,mmu-mir-196b,mmu-mir-382,mmu-mir-10b,mmu-mir-29c,mmu-mir-211,mmu-mir-134,mmu-mir-541,mmu-mir-377,mmu-mir-135b,mmu-mir-341,mmu-mir-199b,mmu-mir-708,mmu-mir-196a,mmu-mir-10a,mmu-mir-29b,mmu-mir-325,mmu-mir-322,mmu-mir-488,mmu-mir-504,mmu-mir-22,mmu-mir-148a,mmu-mir-702,mmu-mir-330,mmu-mir-33,mmu-mir-146b,mmu-mir-672,mmu-mir-148b,mmu-mir-877,mmu-mir-674,mmu-mir-92a,mmu-mir-200c,mmu-mir-9…	CHL1,SPEG,MYLK,PTPRU,PTPRM,DSCAM,L1CAM,MYOM3,PHYHIP,COL14A1,FNDC4,EPHA2,FLRT3,DUSP27,PDP1,PPM1L,PPM1J,PTPRR,DUSP9,PPP1CB,INPP5J,DLGAP5,TNS2	9.40936e-05	0.334602	ipr003961:fibronectin, type iii,go:0006470:protein amino acid dephosphorylation (bp),go:0016311:dephosphorylation (bp)
mmu-mir-29c,mmu-mir-29b,mmu-mir-22,mmu-mir-23b,mmu-mir-148a,mmu-mir-27b,mmu-mir-181a,mmu-mir-148b,mmu-mir-181c,mmu-mir-700,mmu-mir-17,mmu-mir-484,mmu-mir-18a,mmu-mir-146b,mmu-mir-20b,mmu-mir-541,mmu-mir-708,mmu-mir-103,mmu-mir-143,mmu-mir-130a,mmu-mir-1191,mmu-mir-20a,mmu-mir-669c,mmu-mir-466g,mmu-mir-702,mmu-mir-298,mmu-mir-1983,mmu-mir-592,mmu-mir-134,mmu-mir-488,mmu-mir-92a,mmu-mir-187,mmu-mir…	ATP2C2,GJA4,CACHD1,TRPM6,RAMP1,CACNA1B,CACNA1H,RYR2,CYP27B1,CACNA1A,RAMP2,JPH2	0.000129179	0.7888	go:0006816:calcium ion transport (bp),go:0070588:calcium ion transmembrane transport (bp)
mmu-mir-182,mmu-mir-23b,mmu-mir-92a,mmu-mir-148a,mmu-mir-301a,mmu-mir-27b,mmu-mir-183,mmu-mir-181a,mmu-mir-33,mmu-mir-92b,mmu-mir-146b,mmu-mir-19a,mmu-mir-148b,mmu-mir-7a,mmu-mir-1983,mmu-mir-484,mmu-mir-10b,mmu-mir-135b,mmu-mir-103,mmu-mir-10a,mmu-mir-504,mmu-mir-541,mmu-mir-325,mmu-mir-17,mmu-mir-20a,mmu-mir-467c,mmu-mir-20b,mmu-mir-18b,mmu-mir-31,mmu-mir-18a,mmu-mir-96,mmu-mir-346,mmu-mir-421,…	RAB39B,RAB36,RAB3D,RAB4A,RHOV,HRAS,RRAS,REM2,MRAS,IFT27,RAB15,ARL4D,ITSN1,RGL1,RASGEF1B	0.000204864	0.77677	ipr001806:ras gtpase,ipr020849:ras small gtpase,ipr003579:ras small gtpase, rab type,ipr003578:small gtpase, rho type,ipr005225:small gtp-binding protein domain,go:0007264:small gtpase mediated signal transduction (bp),ipr002041:ran gtpase
mmu-mir-421,mmu-mir-182,mmu-mir-429,mmu-mir-484,mmu-mir-141,mmu-mir-31,mmu-mir-330,mmu-mir-200b,mmu-mir-183,mmu-mir-96,mmu-mir-200a,mmu-mir-297a,mmu-mir-148a,mmu-mir-148b,mmu-mir-23b,mmu-mir-17,mmu-mir-92a,mmu-mir-20a,mmu-mir-301a,mmu-mir-130b,mmu-mir-92b,mmu-mir-20b,mmu-mir-7a,mmu-mir-200c,mmu-mir-27b,mmu-mir-467a,mmu-mir-181a,mmu-mir-298,mmu-mir-467c,mmu-mir-181c,mmu-mir-211,mmu-mir-135b,mmu-mi…	JAM3,MPZ,PTPRM,CD8A,MPZL1,L1CAM,CADM3,CD22,H2-T9,ITGB2,ITGAM,NLGN2	0.000238126	0.683538	kegg:04514:cell adhesion molecules (cams)
mmu-mir-182,mmu-mir-18b,mmu-mir-130b,mmu-mir-183,mmu-mir-18a,mmu-mir-148b,mmu-mir-301b,mmu-mir-7a,mmu-mir-199b,mmu-mir-130a,mmu-mir-325,mmu-mir-215,mmu-mir-293,mmu-mir-429,mmu-mir-200c,mmu-mir-27b,mmu-mir-330,mmu-mir-200b,mmu-mir-467a,mmu-mir-181a,mmu-mir-298,mmu-mir-467c,mmu-mir-181c,mmu-mir-421,mmu-mir-23b,mmu-mir-191,mmu-mir-29c,mmu-mir-211,mmu-mir-135b,mmu-mir-708,mmu-mir-103,mmu-mir-29b,mmu-…	CELSR1,PRKCZ,FZD9,ADGRB2,CD8A,ADGRE5,L1CAM,ADGRG3,ADGRL1,AGT,ADGRL4,CD22,TACR1,CALCA	0.000400303	0.726921	go:0007166:cell surface receptor linked signaling pathway (bp),go:0007186:g-protein coupled receptor protein signaling pathway (bp),go:0007218:neuropeptide signaling pathway (bp)
mmu-mir-20a,mmu-mir-674,mmu-mir-182,mmu-mir-17,mmu-mir-148a,mmu-mir-141,mmu-mir-301a,mmu-mir-669c,mmu-mir-702,mmu-mir-18b,mmu-mir-31,mmu-mir-130b,mmu-mir-704,mmu-mir-183,mmu-mir-18a,mmu-mir-146b,mmu-mir-19a,mmu-mir-148b,mmu-mir-298,mmu-mir-877,mmu-mir-20b,mmu-mir-200a,mmu-mir-421,mmu-mir-181a,mmu-mir-181c,mmu-mir-92a,mmu-mir-467d,mmu-mir-467a,mmu-mir-92b,mmu-mir-429,mmu-mir-200c,mmu-mir-200b,mmu-…	ABCB1B,ABCC5,ABCA8A,ABCG4,ABCB4,ABCA2,ABCA8B,DNAH8,WRNIP1,HELZ2	0.00245949	0.789475	ipr003593:atpase, aaa+ type, core,kegg:02010:abc transporters
FRPs Week 12
miRNAs	Targets	FDR	Silhouette	Terms
mmu-mir-181c,mmu-mir-421,mmu-mir-23b,mmu-mir-206,mmu-mir-325,mmu-mir-137,mmu-mir-27b,mmu-mir-181a,mmu-mir-146b,mmu-mir-330,mmu-mir-31,mmu-mir-200b,mmu-mir-30c,mmu-mir-1968,mmu-mir-92b,mmu-mir-19a,mmu-mir-200a,mmu-mir-96,mmu-mir-182,mmu-mir-200c,mmu-mir-92a,mmu-mir-467d,mmu-mir-141,mmu-mir-301a,mmu-mir-467a,mmu-mir-130a,mmu-mir-199b,mmu-mir-488,mmu-mir-1199,mmu-mir-148b,mmu-mir-183,mmu-mir-18a,mmu…	FGF20,IL1B,PDGFRA,DUSP8,RPS6KA1,FGF1,PDGFRB,PLA2G2D,NFATC2,FGF13,PRKACA,CACNA1H,FGF12,PTPRR,CACNA1F,PLA2G4E,NR4A1,MRAS,FLNB,CACNA1A,BMPER,PRKCZ,NPNT,ITGB3,CD44,GPER1,MYLK,ARHGEF6,DIAP2,TIAM2,PFN2,MYH10,PIP5K1B,PIK3CG,PPP1CB,PODXL,SNAI2,CTSH,S1PR1,VIL1,AQP1,INSR,JAM3,ENPEP,SHROOM2,HOXA5,PTK7,CCDC88A,PGF,CAV2,COL4A5,LAMA4,COMP,SHC2,CAPN2,COL6A6,EPHA2,ANGPT2,CLNK,AHI1,TUBB2B,TUBB1,ADCY3,GJA1,HTR2A,H…	3.51011e-19	0.0894102	kegg:04010:mapk signaling pathway,go:0070374:positive regulation of erk1 and erk2 cascade (bp),kegg:04810:regulation of actin cytoskeleton,go:0030335:positive regulation of cell migration (bp),go:0016477:cell migration (bp),kegg:04020:calcium signaling pathway,kegg:04510:focal adhesion,kegg:05200:pathways in cancer,kegg:05218:melanoma,go:0007169:transmembrane receptor protein tyrosine kinase sign…
mmu-mir-181c,mmu-mir-421,mmu-mir-23b,mmu-mir-148b,mmu-mir-148a,mmu-mir-27b,mmu-mir-146b,mmu-mir-30c,mmu-mir-672,mmu-mir-7a,mmu-mir-484,mmu-mir-15b,mmu-mir-181a,mmu-mir-330,mmu-mir-31,mmu-mir-200b,mmu-mir-1968,mmu-mir-92b,mmu-mir-19a,mmu-mir-200a,mmu-mir-96,mmu-mir-182,mmu-mir-200c,mmu-mir-92a,mmu-mir-467d,mmu-mir-141,mmu-mir-301a,mmu-mir-467a,mmu-mir-183,mmu-mir-18a,mmu-mir-138,mmu-mir-215,mmu-mi…	FGF20,PPARG,TCF7,PDGFRA,FGF1,GLI2,FZD9,PAX8,PDGFRB,PGF,ARNT2,COL4A5,FGF13,EGLN1,FGF12,TCF7L1,TRAF4,RXRG,LAMA4,WNT6,PIK3CG,EGLN3,FRZB,EOMES,DCX,CDK5R1,MYH10,SHROOM2,S1PR1,EMX2,HIC1,CDK14,MARK1,DKK3,CD44,WIF1,KLHL12,PYGO1,PTK7,SNAI2,PTPRU,RYR2,RUNX2,BCL11B,EDA,DSG2,ITGB3,CACNA1F,GJA1,GNAO1,EDNRB,PRKACA,ADCY3,PRKAR1B,FLI1,TGM1,SLIT3,INSR,PTPRM,PTPRJ,DLK1,HUS1,FOXM1,TPM1,PPP2R5B,NFATC2	1.69418e-15	0.0706956	kegg:05200:pathways in cancer,go:0007420:brain development (bp),go:0016055:wnt receptor signaling pathway (bp),go:0060070:wnt receptor signaling pathway through beta-catenin (bp),go:0042475:odontogenesis of dentine-containing tooth (bp),kegg:05412:arrhythmogenic right ventricular cardiomyopathy (arvc),kegg:04916:melanogenesis,go:0009887:organ morphogenesis (bp),kegg:04520:adherens junction,go:000…
mmu-mir-877,mmu-mir-181b,mmu-mir-181d,mmu-mir-20b,mmu-mir-17,mmu-mir-467a,mmu-mir-146b,mmu-mir-148b,mmu-mir-30c,mmu-mir-148a,mmu-mir-130b,mmu-mir-301a,mmu-mir-27b,mmu-mir-200b,mmu-mir-704,mmu-mir-429,mmu-mir-200c,mmu-mir-20a,mmu-mir-31,mmu-mir-669b,mmu-mir-23b,mmu-mir-15b,mmu-mir-298,mmu-mir-325,mmu-mir-137,mmu-mir-702,mmu-mir-375,mmu-mir-484,mmu-mir-18b,mmu-mir-330,mmu-mir-92b,mmu-mir-18a,mmu-mi…	MYLK,MYL6B,AGTR1A,ACTG2,PLA2G2D,PRKACA,NPR2,CACNA1F,PLA2G4E,ADCY3,ADRA1D,PPP1CB,RAMP2,SLC15A1,COL4A5,FXYD2,SLC8A2,CPA3,COL15A1,KCNQ1,COL6A6,ABCB1B,KCNN2,ABCB4,AQP1,LPO,NOS1,ADRB3,SLC9A6,TNNT2,RYR2,COX8A,TPM1,SLC1A2,GNAO1,SLC1A3,SHANK2,CACNA1A,RAB3D,ITGB3,GPX7,ALOX8,ALOX12,CYP2J6	2.96654e-12	0.00620499	kegg:04270:vascular smooth muscle contraction,kegg:04020:calcium signaling pathway,kegg:04974:protein digestion and absorption,kegg:04976:bile secretion,kegg:04970:salivary secretion,kegg:04260:cardiac muscle contraction,kegg:04724:glutamatergic synapse,kegg:04972:pancreatic secretion,kegg:05414:dilated cardiomyopathy,kegg:00590:arachidonic acid metabolism
mmu-mir-330,mmu-mir-31,mmu-mir-200b,mmu-mir-183,mmu-mir-200a,mmu-mir-297a,mmu-mir-96,mmu-mir-421,mmu-mir-429,mmu-mir-182,mmu-mir-141,mmu-mir-484,mmu-mir-181d,mmu-mir-148b,mmu-mir-148a,mmu-mir-181b,mmu-mir-20a,mmu-mir-34a,mmu-mir-92b,mmu-mir-20b,mmu-mir-7a,mmu-mir-23b,mmu-mir-92a,mmu-mir-130b,mmu-mir-17,mmu-mir-301a,mmu-mir-211,mmu-mir-103,mmu-mir-143,mmu-mir-135b,mmu-mir-488,mmu-mir-29c,mmu-mir-1…	JAM3,ALCAM,MPZ,PTPRM,MPZL1,L1CAM,CADM3,CHL1,DSG2,CLSTN3,PCDH12,FAT4,PCDH20,PHYHIP,SPEG,EPHA2,MYLK,PTPRU,PTPRO,MYOM3,PTPRJ,FLRT3,BOC,COL20A1,INSR,CLDN10,CLDN6,NRXN2,CLDN19,NLGN2	1.03725e-08	0.210167	kegg:04514:cell adhesion molecules (cams),go:0007156:homophilic cell adhesion (bp),ipr003961:fibronectin, type iii
mmu-mir-206,mmu-mir-325,mmu-mir-137,mmu-mir-20a,mmu-mir-181a,mmu-mir-146b,mmu-mir-330,mmu-mir-31,mmu-mir-148b,mmu-mir-200b,mmu-mir-183,mmu-mir-704,mmu-mir-92b,mmu-mir-19a,mmu-mir-148a,mmu-mir-298,mmu-mir-96,mmu-mir-20b,mmu-mir-181b,mmu-mir-421,mmu-mir-7a,mmu-mir-429,mmu-mir-182,mmu-mir-200c,mmu-mir-92a,mmu-mir-17,mmu-mir-301a,mmu-mir-181d,mmu-mir-130b,mmu-mir-130a,mmu-mir-199b,mmu-mir-30c,mmu-mir…	IL1B,SGMS1,VNN1,PPARG,HC,PRKCZ,AGTR1A,HDAC7,CXCL15,IL34,CXCL1,HCK,PYCARD,HDAC9,CCL22,THEMIS2,TLR11,PIK3CG,CX3CR1,ACVR2A,PDGFRA,IL1RAP,GDF5,PDGFRB,TNFRSF11A,IL7R,OSM,CXCR3,EDA,AMH,ELMO1,TIAM2,PRKACA,SHC2,ADCY3,SBSPON,BMP6,ENPP2	2.30252e-08	0.382878	go:0006954:inflammatory response (bp),kegg:04062:chemokine signaling pathway,kegg:04060:cytokine-cytokine receptor interaction,go:0006955:immune response (bp)
mmu-mir-130a,mmu-mir-708,mmu-mir-143,mmu-mir-150,mmu-mir-29c,mmu-mir-664,mmu-mir-103,mmu-mir-29b,mmu-mir-5129,mmu-mir-325,mmu-mir-1943,mmu-mir-20a,mmu-mir-181a,mmu-mir-1953,mmu-mir-200b,mmu-mir-30c,mmu-mir-181c,mmu-mir-669b,mmu-mir-1983,mmu-mir-183,mmu-mir-704,mmu-mir-92b,mmu-mir-18a,mmu-mir-19a,mmu-mir-672,mmu-mir-7a,mmu-mir-429,mmu-mir-200c,mmu-mir-92a,mmu-mir-484,mmu-mir-15b,mmu-mir-467a,mmu-m…	SRGAP3,SEMA4G,EPHA2,SEMA3A,PLXNA1,EFNB1,SEMA3C,DPYSL2,NFATC2,RGS3,L1CAM,PLXNA4,ABLIM2,LRRC4C,SLIT3,PLXND1,ITGB3	1.10302e-07	0.603066	kegg:04360:axon guidance,ipr001627:semaphorin/cd100 antigen,ipr003659:plexin/semaphorin/integrin
mmu-mir-31,mmu-mir-200a,mmu-mir-421,mmu-mir-141,mmu-mir-27b,mmu-mir-181a,mmu-mir-146b,mmu-mir-330,mmu-mir-148b,mmu-mir-181c,mmu-mir-704,mmu-mir-19a,mmu-mir-375,mmu-mir-148a,mmu-mir-181b,mmu-mir-7a,mmu-mir-182,mmu-mir-23b,mmu-mir-181d,mmu-mir-211,mmu-mir-130a,mmu-mir-486,mmu-mir-143,mmu-mir-199b,mmu-mir-215,mmu-mir-325,mmu-mir-1943,mmu-mir-488,mmu-mir-592,mmu-mir-22,mmu-mir-196b,mmu-mir-196a,mmu-m…	MASP2,C1RA,CCBE1,BMP1,NPNT,EDIL3,NRXN2,LTBP2,NRG4,CD93,DLK1,ADGRE5,FAT4,WIF1,CRELD1,LAMA4,COMP,ADGRL4,SLIT3,TLL1,ADAM19	1.51938e-07	0.569793	ipr006210:epidermal growth factor-like,ipr001881:egf-like calcium-binding,ipr000742:epidermal growth factor-like, type 3
mmu-mir-877,mmu-mir-181b,mmu-mir-181d,mmu-mir-298,mmu-mir-15b,mmu-mir-27b,mmu-mir-181a,mmu-mir-146b,mmu-mir-330,mmu-mir-31,mmu-mir-200b,mmu-mir-30c,mmu-mir-181c,mmu-mir-1968,mmu-mir-92b,mmu-mir-19a,mmu-mir-200a,mmu-mir-96,mmu-mir-421,mmu-mir-182,mmu-mir-200c,mmu-mir-92a,mmu-mir-467d,mmu-mir-141,mmu-mir-301a,mmu-mir-467a,mmu-mir-148b,mmu-mir-148a,mmu-mir-130b,mmu-mir-703,mmu-mir-183,mmu-mir-375,mm…	MYLK,NOS1,PDGFRA,AGTR1A,EDNRB,PTGER3,HRH1,P2RX3,P2RX1,PDGFRB,HTR7,PTGER1,HTR4,PRKACA,CACNA1H,ADRB3,RYR2,SLC8A2,CACNA1F,ADCY3,ADRA1D,CACNA1A,HTR2A,LPAR2,S1PR1,TSPO,CHRNA1,P2RY2	4.2636e-07	0.72729	kegg:04020:calcium signaling pathway,ipr017452:gpcr, rhodopsin-like superfamily,kegg:04080:neuroactive ligand-receptor interaction,ipr000276:gpcr, rhodopsin-like, 7tm,go:0007186:g-protein coupled receptor protein signaling pathway (bp)
mmu-mir-29c,mmu-mir-29b,mmu-mir-325,mmu-mir-1943,mmu-mir-301b,mmu-mir-130b,mmu-mir-330,mmu-mir-31,mmu-mir-200b,mmu-mir-183,mmu-mir-200a,mmu-mir-297a,mmu-mir-96,mmu-mir-421,mmu-mir-429,mmu-mir-182,mmu-mir-141,mmu-mir-484,mmu-mir-27b,mmu-mir-146b,mmu-mir-181a,mmu-mir-148b,mmu-mir-181c,mmu-mir-704,mmu-mir-19a,mmu-mir-375,mmu-mir-148a,mmu-mir-181b,mmu-mir-7a,mmu-mir-23b,mmu-mir-181d,mmu-mir-34a,mmu-m…	EPHA2,ANGPT2,JAM3,TNFAIP2,CCBE1,ENPEP,FGF1,CYP1B1,PGF,S1PR1,RAMP2,MMP19,AURKB,RPS6KA1,MARK1,LMTK3,SIK2,PRKACA,HCK,PTK7,AATK,INSR,GSG2,PDGFRB,NRGN	4.80088e-06	0.253406	go:0001525:angiogenesis (bp),ipr001245:serine-threonine/tyrosine-protein kinase,go:0007243:protein kinase cascade (bp)
mmu-mir-143,mmu-mir-504,mmu-mir-22,mmu-mir-20a,mmu-mir-31,mmu-mir-148b,mmu-mir-183,mmu-mir-672,mmu-mir-148a,mmu-mir-200a,mmu-mir-20b,mmu-mir-7a,mmu-mir-17,mmu-mir-330,mmu-mir-92b,mmu-mir-466g,mmu-mir-92a,mmu-mir-484,mmu-mir-187,mmu-mir-669d,mmu-mir-325,mmu-mir-137,mmu-mir-27b,mmu-mir-669b,mmu-mir-18a,mmu-mir-96,mmu-mir-29c,mmu-mir-29b,mmu-mir-30c,mmu-mir-181a,mmu-mir-181c,mmu-mir-181b,mmu-mir-23b…	P2RX3,P2RX1,CACNA1H,RYR2,CACNA1F,CACNA1A,ATP2C2,STIM1,GJA4,CACHD1,TRPM6,CYP27B1,RAMP2,JPH2	1.53204e-05	0.521256	kegg:04020:calcium signaling pathway,go:0006816:calcium ion transport (bp),go:0070588:calcium ion transmembrane transport (bp)
mmu-mir-181c,mmu-mir-187,mmu-mir-10a,mmu-mir-20a,mmu-mir-148b,mmu-mir-183,mmu-mir-19a,mmu-mir-148a,mmu-mir-96,mmu-mir-20b,mmu-mir-130b,mmu-mir-17,mmu-mir-301a,mmu-mir-330,mmu-mir-200a,mmu-mir-421,mmu-mir-141,mmu-mir-15b,mmu-mir-467a,mmu-mir-1983,mmu-mir-877,mmu-mir-298,mmu-mir-181b,mmu-mir-181d,mmu-mir-27b,mmu-mir-181a,mmu-mir-30c,mmu-mir-301b,mmu-mir-674,mmu-mir-484,mmu-mir-31,mmu-mir-200b,mmu-m…	SERPINB11,WFDC12,HC,CD109,TIMP3,TIMP2,ITIH5,RECK,AGT,SERPINI1,SERPINA3F,PI16	0.000301397	0.738676	go:0010951:negative regulation of endopeptidase activity (bp),go:0010466:negative regulation of peptidase activity (bp)
mmu-mir-92a,mmu-mir-15b,mmu-mir-20a,mmu-mir-27b,mmu-mir-181a,mmu-mir-200b,mmu-mir-183,mmu-mir-92b,mmu-mir-200a,mmu-mir-298,mmu-mir-96,mmu-mir-20b,mmu-mir-181b,mmu-mir-466g,mmu-mir-421,mmu-mir-429,mmu-mir-182,mmu-mir-200c,mmu-mir-23b,mmu-mir-130b,mmu-mir-141,mmu-mir-146b,mmu-mir-181c,mmu-mir-669b,mmu-mir-19a,mmu-mir-7a,mmu-mir-181d,mmu-mir-31,mmu-mir-148b,mmu-mir-467c,mmu-mir-1983,mmu-mir-18a,mmu-…	HOXA9,ACVR2A,DLK1,HOXC6,GAS1,HOXA5,HOXD8,HOXB4,EMX2,MLLT3,WNT6	0.000689024	0.645299	go:0048706:embryonic skeletal system development (bp),go:0009952:anterior/posterior pattern formation (bp),ipr020479:homeobox, eukaryotic
mmu-mir-10a,mmu-mir-92a,mmu-mir-130a,mmu-mir-103,mmu-mir-877,mmu-mir-181b,mmu-mir-677,mmu-mir-181d,mmu-mir-27b,mmu-mir-18b,mmu-mir-330,mmu-mir-200b,mmu-mir-18a,mmu-mir-19a,mmu-mir-200a,mmu-mir-7a,mmu-mir-429,mmu-mir-182,mmu-mir-200c,mmu-mir-141,mmu-mir-484,mmu-mir-15b,mmu-mir-9,mmu-mir-211,mmu-mir-708,mmu-mir-143,mmu-mir-10b,mmu-mir-31,mmu-mir-92b,mmu-mir-466g,mmu-mir-187,mmu-mir-146b,mmu-mir-148…	SLC12A8,HCN3,KCNN2,FXYD2,KCNC2,KCNF1,KCNH1,KCNQ1,AQP1,CACNA1H,CLCN6,CACNA1A,CACNA1F	0.000886088	0.567319	go:0006813:potassium ion transport (bp),go:0034765:regulation of ion transmembrane transport (bp),go:0071805:
mmu-mir-130a,mmu-mir-199b,mmu-mir-488,mmu-mir-20a,mmu-mir-148b,mmu-mir-183,mmu-mir-92b,mmu-mir-877,mmu-mir-181b,mmu-mir-466g,mmu-mir-146b,mmu-mir-330,mmu-mir-19a,mmu-mir-200c,mmu-mir-674,mmu-mir-92a,mmu-mir-34a,mmu-mir-148a,mmu-mir-200a,mmu-mir-20b,mmu-mir-7a,mmu-mir-23b,mmu-mir-130b,mmu-mir-17,mmu-mir-301a,mmu-mir-181a,mmu-mir-18b,mmu-mir-181c,mmu-mir-18a,mmu-mir-672,mmu-mir-375,mmu-mir-301b,mmu…	DUSP8,PDP1,PTPRU,PTPRM,PPM1L,PHPT1,PPM1J,PTPRO,PTPRR,PTPRJ,PPP1CB,INPP5J,DLGAP5,TNS2	0.000891277	0.77203	go:0006470:protein amino acid dephosphorylation (bp),go:0016311:dephosphorylation (bp),go:0035335:,ipr000387:protein-tyrosine/dual-specificity phosphatase
mmu-mir-27b,mmu-mir-181a,mmu-mir-146b,mmu-mir-148b,mmu-mir-1983,mmu-mir-183,mmu-mir-92b,mmu-mir-19a,mmu-mir-148a,mmu-mir-181b,mmu-mir-7a,mmu-mir-182,mmu-mir-23b,mmu-mir-92a,mmu-mir-301a,mmu-mir-15b,mmu-mir-30c,mmu-mir-484,mmu-mir-103,mmu-mir-149,mmu-mir-10a,mmu-mir-135b,mmu-mir-504,mmu-mir-10b,mmu-mir-325,mmu-mir-330,mmu-mir-200b,mmu-mir-200a,mmu-mir-96,mmu-mir-429,mmu-mir-200c,mmu-mir-674,mmu-mi…	RAB39B,RAB36,RAB3D,RAB4A,RHOF,RAB34,MRAS,RAB15,ARL4D,ARL2,ARL5C	0.000923412	0.816828	ipr005225:small gtp-binding protein domain,ipr001806:ras gtpase,ipr020849:ras small gtpase,ipr003579:ras small gtpase, rab type,ipr003578:small gtpase, rho type,ipr002041:ran gtpase,go:0007264:small gtpase mediated signal transduction (bp)
mmu-mir-293,mmu-mir-330,mmu-mir-191,mmu-mir-421,mmu-mir-23b,mmu-mir-211,mmu-mir-486,mmu-mir-34a,mmu-mir-183,mmu-mir-96,mmu-mir-182,mmu-mir-15b,mmu-mir-19a,mmu-mir-146b,mmu-mir-200b,mmu-mir-181c,mmu-mir-181b,mmu-mir-429,mmu-mir-17,mmu-mir-181d,mmu-mir-138,mmu-mir-215,mmu-mir-325,mmu-mir-674,mmu-mir-130a,mmu-mir-199b,mmu-mir-29c,mmu-mir-103,mmu-mir-708,mmu-mir-29b,mmu-mir-143,mmu-mir-1943,mmu-mir-1…	ADGRB2,ADGRE5,ADGRG3,ADGRL1,PKD1L2,ADGRL4,FZD9,AGT,PRKCZ,L1CAM	0.00116366	0.772364	go:0007218:neuropeptide signaling pathway (bp),ipr000203:gps domain,go:0007186:g-protein coupled receptor protein signaling pathway (bp),go:0007166:cell surface receptor linked signaling pathway (bp)
mmu-mir-148a,mmu-mir-15b,mmu-mir-7a,mmu-mir-20a,mmu-mir-27b,mmu-mir-146b,mmu-mir-375,mmu-mir-34a,mmu-mir-30c,mmu-mir-183,mmu-mir-421,mmu-mir-181a,mmu-mir-181c,mmu-mir-669b,mmu-mir-19a,mmu-mir-200a,mmu-mir-669d,mmu-mir-181b,mmu-mir-23b,mmu-mir-130b,mmu-mir-467d,mmu-mir-141,mmu-mir-301a,mmu-mir-181d,mmu-mir-18b,mmu-mir-148b,mmu-mir-18a,mmu-mir-96,mmu-mir-182,mmu-mir-31,mmu-mir-200b,mmu-mir-672,mmu-…	ACSL1,ACADL,ECH1,ECHS1,HPGD,ACSM5,PPARA,SNCA	0.00139186	0.907517	go:0006631:fatty acid metabolic process (bp)
mmu-mir-206,mmu-mir-325,mmu-mir-20a,mmu-mir-181a,mmu-mir-181c,mmu-mir-467e,mmu-mir-148a,mmu-mir-96,mmu-mir-20b,mmu-mir-181b,mmu-mir-23b,mmu-mir-17,mmu-mir-181d,mmu-mir-330,mmu-mir-148b,mmu-mir-19a,mmu-mir-301b,mmu-mir-130b,mmu-mir-301a,mmu-mir-211,mmu-mir-10a,mmu-mir-138,mmu-mir-215,mmu-mir-1943,mmu-mir-504,mmu-mir-10b,mmu-mir-137,mmu-mir-22,mmu-mir-200b,mmu-mir-375,mmu-mir-200a,mmu-mir-141,mmu-m…	ID2,TFEC,MLXIPL,ARNT2,MSC,MYF6,SCX,HIF3A,HEYL	0.00143977	0.916683	ipr001092:helix-loop-helix dna-binding domain
mmu-mir-15b,mmu-mir-20a,mmu-mir-146b,mmu-mir-92b,mmu-mir-18a,mmu-mir-298,mmu-mir-23b,mmu-mir-92a,mmu-mir-17,mmu-mir-700,mmu-mir-20b,mmu-mir-467a,mmu-mir-27b,mmu-mir-181a,mmu-mir-330,mmu-mir-191,mmu-mir-31,mmu-mir-200b,mmu-mir-467c,mmu-mir-30c,mmu-mir-181c,mmu-mir-669b,mmu-mir-1983,mmu-mir-704,mmu-mir-19a,mmu-mir-672,mmu-mir-375,mmu-mir-200a,mmu-mir-877,mmu-mir-96,mmu-mir-181b,mmu-mir-421,mmu-mir-…	DST,CIB2,MYL6B,ITSN1,FSTL1,LCP1,CAPN11,RYR2,PLCH1,CAPN2,MYL1,EFHB,S100A8	0.0019262	0.755058	ipr018249:ef-hand 2,ipr002048:calcium-binding ef-hand
mmu-mir-20a,mmu-mir-15b,mmu-mir-146b,mmu-mir-18b,mmu-mir-702,mmu-mir-34a,mmu-mir-31,mmu-mir-148b,mmu-mir-30c,mmu-mir-183,mmu-mir-704,mmu-mir-18a,mmu-mir-19a,mmu-mir-148a,mmu-mir-200a,mmu-mir-877,mmu-mir-298,mmu-mir-20b,mmu-mir-182,mmu-mir-674,mmu-mir-130b,mmu-mir-17,mmu-mir-141,mmu-mir-301a,mmu-mir-669c,mmu-mir-181a,mmu-mir-181c,mmu-mir-181b,mmu-mir-421,mmu-mir-181d,mmu-mir-200b,mmu-mir-7a,mmu-mi…	ABCB1B,ABCC5,ABCA8A,ABCB4,ABCA2,ABCA8B,DNAH8,ENSMUSG00000021020	0.0222232	0.850694	ipr003593:atpase, aaa+ type, core,kegg:02010:abc transporters
FRPs Negative Trends
miRNAs	Targets	FDR	Silhouette	Terms
mmu-mir-150,mmu-mir-874,mmu-mir-1958,mmu-mir-504,mmu-mir-669e,mmu-mir-137,mmu-mir-203,mmu-mir-133a,mmu-mir-133b,mmu-mir-698	CLIC6,KCNE4,KCTD4,KCNK3	0.00255545	0.799539	go:0034765:regulation of ion transmembrane transport (bp);go:0006813:potassium ion transport (bp);go:0071805:;go:0006811:ion transport (bp)
mmu-mir-698,mmu-mir-137,mmu-mir-206,mmu-mir-203,mmu-mir-133a,mmu-mir-133b	IL1B,FGF13,MUSK,CITED1	0.00926122	0.499963	go:0001934:positive regulation of protein amino acid phosphorylation (bp);go:0010628:positive regulation of gene expression (bp)
mmu-mir-698,mmu-mir-137,mmu-mir-206,mmu-mir-203,mmu-mir-708,mmu-mir-669b,mmu-mir-504	IL1B,CXCL1,FKBP1B,NFKBID	0.0109689	0.499927	go:0007204:elevation of cytosolic calcium ion concentration (bp);go:0006954:inflammatory response (bp)
FRPs Positive Trends
miRNAs	Targets	FDR	Silhouette	Terms
mmu-mir-326,mmu-mir-1188,mmu-mir-692,mmu-mir-375,mmu-mir-1187,mmu-mir-1927,mmu-mir-376b,mmu-mir-688	MYLK2,ANKRD1,TCAP,TTN,NEB,MYPN	2.47699e-08	0.363977	go:0055008:cardiac muscle tissue morphogenesis (bp);go:0045214:sarcomere organization (bp)
mmu-mir-375,mmu-mir-5107,mmu-mir-1188,mmu-mir-692,mmu-mir-541,mmu-mir-1187,mmu-mir-204,mmu-mir-326,mmu-mir-694,mmu-mir-325	SCN4B,SCN2A1,KCNQ4,KCNV2,KCNA7,CLIC5,CACNA2D2,KCNA1,ATP1A3	4.6324e-07	0.685531	go:0034765:regulation of ion transmembrane transport (bp);go:0006813:potassium ion transport (bp);go:0071805:;ipr003091:voltage-dependent potassium channel
mmu-mir-325,mmu-mir-375,mmu-mir-546,mmu-mir-541,mmu-mir-204,mmu-mir-688,mmu-mir-326,mmu-mir-1187,mmu-mir-692,mmu-mir-1927,mmu-mir-376b,mmu-mir-1188	MYH4,MYBPC1,MYL6B,TPM2,MYOM2,FXYD1,TTN,MYL1,MYL3,PVALB	5.96023e-07	0.00620255	go:0006936:muscle contraction (bp);ipr018249:ef-hand 2
mmu-mir-688,mmu-mir-1188,mmu-mir-1927,mmu-mir-376b,mmu-mir-692,mmu-mir-204,mmu-mir-375,mmu-mir-543,mmu-mir-1956,mmu-mir-326,mmu-mir-541	ADGRB2,CELSR3,PTH1R,ADGRF1,ATP2B2,FXYD1,TRDN	1.66189e-06	0.0410704	go:0007186:g-protein coupled receptor protein signaling pathway (bp);go:0007165:signal transduction (bp);go:0007166:cell surface receptor linked signaling pathway (bp);ipr000832:gpcr, family 2, secretin-like;ipr017981:gpcr, family 2-like;go:0006874:cellular calcium ion homeostasis (bp)
mmu-mir-326,mmu-mir-1945,mmu-mir-1188,mmu-mir-692,mmu-mir-1927,mmu-mir-376b,mmu-mir-217,mmu-mir-325,mmu-mir-196a,mmu-mir-375,mmu-mir-204	TWIST1,MSX2,SPP1,IHH,PTN,PTH1R	3.34952e-06	0.720957	go:0001503:ossification (bp);go:0001649:osteoblast differentiation (bp)
mmu-mir-196a,mmu-mir-376b,mmu-mir-217,mmu-mir-375,mmu-mir-541,mmu-mir-1188,mmu-mir-204,mmu-mir-325,mmu-mir-688	HOXB7,HOXB5,MSX2,HOXC4,PITX2,EN1,WNT16	3.89539e-06	0.6768	ipr020479:homeobox, eukaryotic;go:0009952:anterior/posterior pattern formation (bp)
mmu-mir-196a,mmu-mir-326,mmu-mir-1945,mmu-mir-1188,mmu-mir-692,mmu-mir-1927,mmu-mir-376b,mmu-mir-375,mmu-mir-688	HOXB7,TWIST1,HOXB5,MYCN,GSC	4.18474e-06	0.81512	go:0048704:embryonic skeletal system morphogenesis (bp)
mmu-mir-692,mmu-mir-326,mmu-mir-375,mmu-mir-541,mmu-mir-1187,mmu-mir-1927,mmu-mir-376b,mmu-mir-688,mmu-mir-204	DES,MYL3,TPM2,TTN,CACNA2D2,COX4I2,ATP1A3	5.5602e-06	0.478891	kegg:05410:hypertrophic cardiomyopathy (hcm);kegg:05414:dilated cardiomyopathy;kegg:04260:cardiac muscle contraction
mmu-mir-196a,mmu-mir-672,mmu-mir-694,mmu-mir-326,mmu-mir-543,mmu-mir-692,mmu-mir-204,mmu-mir-375,mmu-mir-3970	ADAM5,TENM2,NRXN2,NRG4,VWA2,CELSR3,WIF1,HHIP	9.48054e-06	0.928913	ipr000742:epidermal growth factor-like, type 3;ipr006210:epidermal growth factor-like
mmu-mir-326,mmu-mir-1188,mmu-mir-672,mmu-mir-376b,mmu-mir-1940,mmu-mir-196a,mmu-mir-543,mmu-mir-325,mmu-mir-541,mmu-mir-204,mmu-mir-375,mmu-mir-692	MYLK2,PHKG1,ATP2B2,PTGER1,ADRB3,CAMK2A,ADRA1D,ATP1A3	3.42684e-05	0.244784	kegg:04020:calcium signaling pathway;kegg:04970:salivary secretion
mmu-mir-326,mmu-mir-541,mmu-mir-692,mmu-mir-204,mmu-mir-1927,mmu-mir-376b,mmu-mir-1956,mmu-mir-196a,mmu-mir-543,mmu-mir-694,mmu-mir-1940,mmu-mir-375	GRIN3A,ADRA2C,PTGER1,TSHR,LEP,ADRB3,PTH1R,ADRA1D	0.000242775	0.729375	kegg:04080:neuroactive ligand-receptor interaction;go:0007165:signal transduction (bp);go:0007186:g-protein coupled receptor protein signaling pathway (bp);ipr017452:gpcr, rhodopsin-like superfamily;ipr000276:gpcr, rhodopsin-like, 7tm
mmu-mir-3470b,mmu-mir-669k,mmu-mir-196a,mmu-mir-546,mmu-mir-543,mmu-mir-802,mmu-mir-694,mmu-mir-204,mmu-mir-692,mmu-mir-541,mmu-mir-326,mmu-mir-1187	LGI1,SLITRK2,OPTC,FLRT1,NYX,LRRC7	0.000557964	0.816496	ipr003591:leucine-rich repeat, typical subtype;ipr000483:cysteine-rich flanking region, c-terminal domain
mmu-mir-326,mmu-mir-692,mmu-mir-204,mmu-mir-375,mmu-mir-1187,mmu-mir-1927,mmu-mir-376b,mmu-mir-196a,mmu-mir-546,mmu-mir-543	SPEG,MYBPC1,MYOM2,TTN,OBSCN,FNDC7	0.000771609	0.887287	ipr003961:fibronectin, type iii
mmu-mir-326,mmu-mir-1945,mmu-mir-1188,mmu-mir-692,mmu-mir-1927,mmu-mir-376b,mmu-mir-217,mmu-mir-375,mmu-mir-688	TWIST1,MSX2,CYP26B1,EN1,MYLK2,WNT16	0.0013497	0.214429	go:0030326:embryonic limb morphogenesis (bp);go:0010628:positive regulation of gene expression (bp)

## Sheet: ST7
Supplementary Table 7. Transition pattern profiles.
Pattern	No. miRNAs	No. targets
p0++	1	15
p+0+	1	5
p+00	8	35
p0+0	4	25
p00+	12	141
p++-	2	7
p+-+	10	36
p-++	1	1
p+-0	5	104
p+0-	9	16
p0+-	10	94
p+0-	9	16
p0-+	4	10
p-+0	9	40
p-0+	4	9
p+--	2	4
p-+-	7	10
p-00	11	69
p00-	6	49
p0-0	1	3

## Sheet: ST8
Supplementary Table 8. Transition pattern profiles with annotation.
Patterns	Mirna(s)	Target gene(s)	KEGG pathways associated
p+++	No microRNAs	No genes	No terms enriched
p++-	mmu-mir-669i,mmu-mir-1953	ensmusg00000000942,ensmusg00000028871,ensmusg00000035681,ensmusg00000034912,ensmusg00000022484,ensmusg00000066392,ensmusg00000036913	Cell adhesion molecules (CAMs)
p++0	No microRNAs	No genes	No terms enriched
p+-+	mmu-mir-9,mmu-mir-5128,mmu-mir-494,mmu-mir-1934,mmu-mir-467b,mmu-mir-1902,mmu-mir-1907,mmu-mir-135b,mmu-mir-1951,mmu-mir-31	ensmusg00000069171,ensmusg00000044499,ensmusg00000002588,ensmusg00000050377,ensmusg00000000320,ensmusg00000055775,ensmusg00000037996,ensmusg00000052271,ensmusg00000040136,ensmusg00000045281,ensmusg00000043673,ensmusg00000060445,ensmusg00000061937,ensmusg00000022491,ensmusg00000063816,ensmusg00000056569,ensmusg00000028033,ensmusg00000021750,ensmusg00000042717,ensmusg00000030167,ensmusg00000024827,…	Type II diabetes mellitus, Arachidonic acid metabolism
p+--	mmu-mir-122,mmu-mir-653	ensmusg00000043110,ensmusg00000047230,ensmusg00000030669,ensmusg00000003476	Cell adhesion molecules (CAMs), Tight junction, Hepatitis C, Neuroactive ligand-receptor interaction
p+-0	mmu-mir-1961,mmu-mir-383,mmu-mir-382,mmu-mir-1192,mmu-mir-1190	ensmusg00000038663,ensmusg00000022123,ensmusg00000029716,ensmusg00000022208,ensmusg00000011171,ensmusg00000026765,ensmusg00000045608,ensmusg00000027016,ensmusg00000025892,ensmusg00000032719,ensmusg00000071868,ensmusg00000036295,ensmusg00000025582,ensmusg00000040649,ensmusg00000051354,ensmusg00000042501,ensmusg00000032572,ensmusg00000045620,ensmusg00000014198,ensmusg00000029784,ensmusg00000023999,…	Glutamatergic synapse, MAPK signaling pathway, Chemokine signaling pathway, Neuroactive ligand-receptor interaction, Calcium signaling pathway, Melanogenesis
p+0+	mmu-mir-217	ensmusg00000021469,ensmusg00000050447,ensmusg00000042672,ensmusg00000050663,ensmusg00000064225	No terms enriched
p+0-	mmu-mir-216b,mmu-mir-493,mmu-mir-208b,mmu-mir-1903,mmu-mir-1a,mmu-mir-489,mmu-mir-128,mmu-mir-758,mmu-mir-547	ensmusg00000019577,ensmusg00000028370,ensmusg00000025488,ensmusg00000027513,ensmusg00000030317,ensmusg00000031906,ensmusg00000052396,ensmusg00000041817,ensmusg00000036172,ensmusg00000050505,ensmusg00000014704,ensmusg00000009356,ensmusg00000066510,ensmusg00000045215,ensmusg00000021198,ensmusg00000039004	TGF-beta signaling pathway
p+00	mmu-mir-669k,mmu-mir-3470b,mmu-mir-690,mmu-mir-196a,mmu-mir-1956,mmu-mir-543,mmu-mir-546,mmu-mir-1940	ensmusg00000063851,ensmusg00000026676,ensmusg00000048899,ensmusg00000039601,ensmusg00000036964,ensmusg00000026644,ensmusg00000041293,ensmusg00000029838,ensmusg00000050677,ensmusg00000046275,ensmusg00000015476,ensmusg00000026645,ensmusg00000002104,ensmusg00000020963,ensmusg00000030674,ensmusg00000031489,ensmusg00000033849,ensmusg00000039824,ensmusg00000022099,ensmusg00000041216,ensmusg00000029273,…	Glycosphingolipid biosynthesis - lacto and neolacto series, Neuroactive ligand-receptor interaction, Fatty acid biosynthesis
p-++	mmu-mir-677	ensmusg00000074001	No terms enriched
p-+-	mmu-mir-216a,mmu-mir-592,mmu-mir-499,mmu-mir-295,mmu-mir-1960,mmu-mir-1966,mmu-mir-1892	ensmusg00000001657,ensmusg00000036466,ensmusg00000033044,ensmusg00000031089,ensmusg00000038916,ensmusg00000050967,ensmusg00000020175,ensmusg00000035296,ensmusg00000022485,ensmusg00000024411	Hypertrophic cardiomyopathy (HCM), Arrhythmogenic right ventricular cardiomyopathy (ARVC), Dilated cardiomyopathy, Viral myocarditis
p-+0	mmu-mir-211,mmu-mir-1930,mmu-mir-18b,mmu-mir-207,mmu-mir-449c,mmu-mir-1970,mmu-mir-705,mmu-mir-124,mmu-mir-682	ensmusg00000058966,ensmusg00000050473,ensmusg00000035860,ensmusg00000026343,ensmusg00000001622,ensmusg00000066861,ensmusg00000030077,ensmusg00000010044,ensmusg00000009092,ensmusg00000021803,ensmusg00000021702,ensmusg00000047443,ensmusg00000043541,ensmusg00000025329,ensmusg00000049551,ensmusg00000010064,ensmusg00000031224,ensmusg00000047797,ensmusg00000042498,ensmusg00000079339,ensmusg00000022790,…	Alanine, aspartate and glutamate metabolism
p--+	No microRNAs	No genes	No terms enriched
p---	No microRNAs	No genes	No terms enriched
p--0	No microRNAs	No genes	No terms enriched
p-0+	mmu-mir-294,mmu-mir-1938,mmu-mir-703,mmu-mir-470	ensmusg00000026147,ensmusg00000031202,ensmusg00000031382,ensmusg00000048583,ensmusg00000003282,ensmusg00000038763,ensmusg00000001510,ensmusg00000033508,ensmusg00000074505	Protein digestion and absorption
p-0-	No microRNAs	No genes	No terms enriched
p-00	mmu-mir-669l,mmu-mir-669e,mmu-mir-669b,mmu-mir-3473c,mmu-mir-3964,mmu-mir-504,mmu-mir-201,mmu-mir-150,mmu-mir-708,mmu-mir-1958,mmu-mir-874	ensmusg00000006435,ensmusg00000061577,ensmusg00000028003,ensmusg00000079662,ensmusg00000049100,ensmusg00000032495,ensmusg00000022181,ensmusg00000022602,ensmusg00000054855,ensmusg00000002808,ensmusg00000055691,ensmusg00000017491,ensmusg00000038932,ensmusg00000040254,ensmusg00000008206,ensmusg00000045996,ensmusg00000049176,ensmusg00000070547,ensmusg00000033740,ensmusg00000042306,ensmusg00000030589,…	Axon guidance
p0++	mmu-mir-325	ensmusg00000039376,ensmusg00000029304,ensmusg00000035606,ensmusg00000047976,ensmusg00000044086,ensmusg00000005716,ensmusg00000008658,ensmusg00000026100,ensmusg00000027004,ensmusg00000061723,ensmusg00000031097,ensmusg00000028023,ensmusg00000024617,ensmusg00000057003,ensmusg00000026697	No terms enriched
p0+-	mmu-mir-1983,mmu-mir-491,mmu-mir-1968,mmu-mir-665,mmu-mir-5113,mmu-mir-449a,mmu-mir-1224,mmu-mir-1971,mmu-mir-488,mmu-mir-3471	ensmusg00000019124,ensmusg00000021604,ensmusg00000070604,ensmusg00000030406,ensmusg00000063919,ensmusg00000047182,ensmusg00000045776,ensmusg00000051969,ensmusg00000025777,ensmusg00000030134,ensmusg00000006642,ensmusg00000068417,ensmusg00000036062,ensmusg00000033730,ensmusg00000032262,ensmusg00000001240,ensmusg00000030303,ensmusg00000046794,ensmusg00000058022,ensmusg00000019326,ensmusg00000039533,…	Insulin signaling pathway, MAPK signaling pathway, Calcium signaling pathway, Adipocytokine signaling pathway
p0+0	mmu-mir-694,mmu-mir-802,mmu-mir-3970,mmu-mir-672	ensmusg00000023959,ensmusg00000042750,ensmusg00000026012,ensmusg00000049336,ensmusg00000025537,ensmusg00000053963,ensmusg00000025082,ensmusg00000048939,ensmusg00000048503,ensmusg00000047344,ensmusg00000050069,ensmusg00000059201,ensmusg00000007021,ensmusg00000015568,ensmusg00000026308,ensmusg00000046818,ensmusg00000041889,ensmusg00000044626,ensmusg00000003477,ensmusg00000041202,ensmusg00000033581,…	No terms enriched
p0-+	mmu-mir-1906,mmu-mir-1905,mmu-mir-3572,mmu-mir-346	ensmusg00000031665,ensmusg00000000296,ensmusg00000008489,ensmusg00000056947,ensmusg00000042268,ensmusg00000042182,ensmusg00000029814,ensmusg00000016239,ensmusg00000060509,ensmusg00000014372	Drug metabolism - cytochrom, Mineral absorption
p0--	No microRNAs	No genes	No terms enriched
p0-0	mmu-mir-190b	ensmusg00000028965,ensmusg00000019932,ensmusg00000026327	Cytokine-cytokine receptor interaction
p00+	mmu-mir-692,mmu-mir-376b,mmu-mir-204,mmu-mir-688,mmu-mir-1927,mmu-mir-326,mmu-mir-5107,mmu-mir-375,mmu-mir-1187,mmu-mir-1188,mmu-mir-541,mmu-mir-1945	ensmusg00000075394,ensmusg00000016349,ensmusg00000038201,ensmusg00000028176,ensmusg00000055761,ensmusg00000034780,ensmusg00000026207,ensmusg00000079355,ensmusg00000044951,ensmusg00000010066,ensmusg00000046480,ensmusg00000040972,ensmusg00000028631,ensmusg00000045912,ensmusg00000056328,ensmusg00000022464,ensmusg00000030302,ensmusg00000059022,ensmusg00000022449,ensmusg00000008496,ensmusg00000029563,…	Cardiac muscle contraction, Hypertrophic cardiomyopathy (HCM), Dilated cardiomyopathy, Calcium signaling pathway, Salivary secretion, Retinol metabolism, Pentose and glucuronate interconversions, Ascorbate and aldarate metabolism
p00-	mmu-mir-137,mmu-mir-698,mmu-mir-133b,mmu-mir-133a,mmu-mir-203,mmu-mir-206	ensmusg00000057280,ensmusg00000046523,ensmusg00000029335,ensmusg00000032890,ensmusg00000069170,ensmusg00000031860,ensmusg00000051279,ensmusg00000050578,ensmusg00000022176,ensmusg00000031137,ensmusg00000071470,ensmusg00000029380,ensmusg00000027971,ensmusg00000037846,ensmusg00000070570,ensmusg00000027398,ensmusg00000021055,ensmusg00000031285,ensmusg00000051499,ensmusg00000028269,ensmusg00000021587,…	Primary immunodeficiency, NOD-like receptor signaling pathway
p000	mmu-mir-377,mmu-mir-100,mmu-mir-468,mmu-mir-29b,mmu-mir-3473b,mmu-mir-5129,mmu-mir-302a,mmu-mir-19b,mmu-mir-186,mmu-mir-678,mmu-mir-148a,mmu-mir-1943,mmu-mir-702,mmu-mir-28c,mmu-let-7a,mmu-mir-199b,mmu-mir-1895,mmu-mir-301b,mmu-mir-879,mmu-mir-149,mmu-mir-697,mmu-mir-210,mmu-mir-669g,mmu-mir-98,mmu-mir-1962,mmu-mir-376a,mmu-mir-130a,mmu-mir-320,mmu-mir-411,mmu-mir-466k,mmu-mir-181b,mmu-mir-29c,mm…	ensmusg00000036777,ensmusg00000055305,ensmusg00000024201,ensmusg00000029238,ensmusg00000020107,ensmusg00000031740,ensmusg00000037579,ensmusg00000031613,ensmusg00000024873,ensmusg00000056106,ensmusg00000016356,ensmusg00000031167,ensmusg00000059498,ensmusg0	No actual expression changes
